1 **Anillin/Mid1p interacts with the ECSRT-associated protein Vps4p**  
2 **and mitotic kinases to regulate cytokinesis in fission yeast**

3

4 Imane M. Rezig<sup>1</sup>, Gwyn W. Gould<sup>1,3,4</sup> and Christopher J. McInerny<sup>2,3</sup>

5

6 <sup>1</sup> Institute of Molecular, Cell and Systems Biology

7 <sup>2</sup> School of Life Sciences

8

9 Henry Wellcome Laboratory of Cell Biology,

10 College of Medical, Veterinary and Life Sciences,

11 Davidson Building,

12 University of Glasgow,

13 Glasgow G12 8QQ,

14 Scotland, United Kingdom

15

16 <sup>3</sup> Email: [Gwyn.Gould@strath.ac.uk](mailto:Gwyn.Gould@strath.ac.uk), [Chris.McInerny@glasgow.ac.uk](mailto:Chris.McInerny@glasgow.ac.uk)

17

18 <sup>4</sup> Current address: Strathclyde Institute of Pharmacy and Biomedical Sciences,

19 University of Strathclyde,

20 161 Cathedral Street,

21 Glasgow G4 0RE,

22 Scotland, United Kingdom

23

24 Short title: Interactions of anillin, ESCRT-associated protein Vps4, aurora and polo

25 kinases

26 **Abstract**

27 Cytokinesis is the final stage of the cell cycle which separates cellular constituents to  
28 produce two daughter cells. Using *Schizosaccharomyces pombe* we have  
29 investigated the role of various classes of proteins involved in this process. Central to  
30 these is anillin/Mid1p which forms a ring-like structure at the cell equator that predicts  
31 the site of cell separation through septation in fission yeast. Here we demonstrate a  
32 direct physical interaction between Mid1p and the endosomal sorting complex  
33 required for transport (ESCRT)-associated protein Vps4p. The interaction is essential  
34 for cell viability, and Vps4p is required for the correct cellular localization of Mid1p.  
35 Furthermore, we show that Mid1p is phosphorylated by the aurora kinase Aurora A,  
36 that the interaction of *mid1* and *ark1* genes is essential for cell viability, and that  
37 Ark1p is also required for the correct cellular localization of Mid1p. We mapped the  
38 sites of phosphorylation of Mid1p by Aurora A and the polo kinase Plk1 and  
39 assessed their importance by mutational analysis. Mutational analysis revealed  
40 S332, S523 and S531 to be required for Mid1p function and its interaction with  
41 Vps4p, Ark1p and Plo1p. Combined our data suggest a physical interaction between  
42 Mip1p and Vps4p important for cytokinesis, and identify phosphorylation of Mid1p by  
43 aurora and polo kinases as being significant for this process.

44

45 **Author summary**

46 Replication is a property of all living cells, with cell separation, so-called cytokinesis,  
47 the final step in the process. A large number of proteins have been identified that are  
48 required for cytokinesis, but in many cases it is not understood how they interact and  
49 regulate each other. In this research we have analysed two classes of proteins  
50 found in all eukaryotic cells with central roles in cytokinesis: the endosomal sorting

51 complex required for transport (ESCRT) proteins and the anillin protein Mid1p. We  
52 identify a direct physical interaction between the ESCRT protein Vps4 and  
53 anillin/Mid1p, and explore how it regulates cytokinesis. Midp1 activity is shown to  
54 controlled by the protein kinase Ark1p by direct phosphorylation, and this  
55 phosphorylation is important for Mid1p function. These observations identify new  
56 ways in which ESCRT and anillin/Mid1p control cell separation.

57

## 58 **Introduction**

59 Much is understood about the control and regulation of the cell division cycle, with  
60 many critical cell cycle mechanisms identified being evolutionarily conserved, present  
61 across the eukaryotic kingdom. One cell cycle stage that has been increasingly  
62 studied is cytokinesis where DNA, organelles and cell constituents are partitioned  
63 and allocated to two daughter cells during their physical separation. The fission yeast  
64 *Schizosaccharomyces pombe* has proven to be an excellent model organism to  
65 study the eukaryotic cell cycle [1]. It is especially useful for studying cytokinesis and  
66 cell division as, explicit in its name, it divides by medial fission involving a contractile  
67 actomyosin ring leading to the process of cell separation, which is similar to these  
68 processes in mammalian cells [2].

69

70 A number of proteins have been identified that regulate cytokinesis in fission yeast,  
71 including those in a signal transduction pathway named the Septation Initiation  
72 Network (SIN) [3]. The SIN proteins form a pathway that facilitates contractile ring  
73 constriction and promotes the formation of a medial cell wall-like structure between  
74 the two daughter cells, called the septum. Furthermore, SIN components associate  
75 with the spindle pole bodies and link mitotic exit with cytokinesis [4]. Sid2p is one  
76 regulator of the SIN-cascade of signaling proteins [5]. It terminates the signaling

77 cascade leading to the transition from the spindle pole bodies to the cell division site  
78 promoting the onset of cytokinesis [6]. A recent study identified anillin/Mid1p as a  
79 substrate for Sid2p and indicated that the phosphorylation of Mid1p facilitates its  
80 removal from the cell cortex during the actomyosin contractile ring constriction [7].

81  
82 Mid1p forms a ring-like structure at the cell equator that predicts the site of cell  
83 separation through the formation of a septum in fission yeast [8,9,10]. In cells  
84 containing a chromosomal deletion of the *mid1* gene (*mid1Δ*), a misshaped  
85 contractile ring is assembled during anaphase when the SIN pathway becomes  
86 active; such observations confirm the important role of Mid1p in directing contractile  
87 ring assembly to its correct location [11,12,13].

88  
89 Many other groups of proteins have a role in septum formation in *S. pombe*. Amongst  
90 these the various classes of ESCRT proteins, including the ESCRT-III regulator  
91 Vps4p, were found to be required for septation, suggesting that they have a role in  
92 cytokinesis in fission yeast [14,15]. Additional experiments suggested that the  
93 ESCRT proteins interacted with established cell cycle regulators including the polo  
94 kinase Plo1p, the aurora kinase Ark1p and the CDC14 phosphatase, Clp1p to control  
95 these processes [14].

96  
97 As a way to further understand the regulation of ESCRT proteins during cytokinesis  
98 in fission yeast, we sought to identify other proteins that interact with anillin/Mid1p.  
99 Here we describe a direct physical interaction between Vps4p and the anillin Mid1p  
100 which is essential for cell viability and for the correct placement of Mid1p. We further  
101 show an interaction between Mid1p and the aurora kinase Ark1p which is essential  
102 for cell viability and identify phospho-acceptor sites in Mid1p and study their role

103 using mutagenesis. Collectively, our observations reveal novel mechanisms by which  
104 cytokinesis is regulated by different classes of proteins acting through Mid1p.

105

## 106 **Results**

### 107 **Genetic and physical interactions between Mid1p and Vps4p in fission yeast**

108 Previously, we identified and characterised the requirement and role of ESCRT  
109 proteins for cytokinesis in fission yeast [15]. These experiments also revealed the  
110 interaction of ESCRT proteins with three cell cycle regulators, the Polo-like kinase  
111 Plo1p, the aurora kinase Ark1p and the CDC14 phosphatase Clp1p. These  
112 observations offered a framework by which ESCRT proteins are regulated to control  
113 cytokinesis. To further explore ways in which the ESCRT proteins might integrate  
114 with other cell cycle regulators to control cytokinesis, we examined their interaction  
115 with the anillin Mid1p. Mid1p has a central structural role in cytokinesis, forming  
116 equatorial nodes to create an annular shaped structure that determines the position  
117 of the division plane [16,13].

118

119 We initiated this by searching for genetic interactions between the *mid1* gene and  
120 genes encoding ESCRTs and ESCRT-associated proteins. Double mutant fission  
121 yeast strains were created containing a chromosomal deletion of *mid1* (*mid1D*) and  
122 individual chromosomal deletions of ESCRT genes from Classes E-0 to E-III and  
123 *vps4* and searching for synthetic phenotypes. *mid1Δ* was combined with *sst4Δ* (E-0),  
124 *sst6Δ* and *vps28Δ* (E-I), *vps36Δ* and *vps25Δ* (EII), *vps20Δ*, *vps32Δ* and *vps2Δ* (E III),  
125 and *vps4Δ* [17,15]. In each case double mutants were created which were viable,  
126 with no apparent synthetic phenotypes (data not shown). The exception was *mid1Δ*

127 *vps4* $\Delta$  which instead failed to form viable colonies and was synthetically lethal (Fig  
128 1A).

129

130 This striking observation demonstrated a genetic interaction between the *mid1* and  
131 *vps4* genes, with one explanation that the two encoded proteins interact to control an  
132 essential cellular function. To test this hypothesis we expressed and purified a His-  
133 tagged version of Vps4p protein from bacteria, using the same method to express  
134 and purify three different GST-tagged domains of Mid1p. Full length Mid1p was not  
135 purified as it is insoluble under such conditions [16,18].

136

137 Full length Mid1p is 920 amino acids in length; the three domains used in pull-down  
138 experiments described here encompass the amino acids 1-453 (“N-term”), 452-579  
139 (“Middle”) and 798-920 (“C-term”) [19,18]. Of these three domains, only the C-  
140 terminus of amino acids 798-920 was pulled-down by recombinant Vps4p (Fig 1B).  
141 This indicates a direct physical interaction between Vps4p and the C-terminus of  
142 Mid1p, and that this interaction involved residues 798-920 of Mid1p.

143

#### 144 **Vps4p is required for the correct cellular distribution of Mid1p**

145 To further understand the interaction between Vps4p and Mid1p we examined the  
146 requirement for Vps4p to control the cellular distribution of GFP-tagged Mid1p during  
147 the cell cycle. Mid1p distribution has been well characterised and shown to move  
148 from the nucleus to the equatorial region to form nodes and a medial ring, that  
149 predicts the site of cell cleavage during septation [8].

150

151 Wild-type cells showed three patterns of GFP-Mid1p: localization to the nucleus,

152 cytoplasmic, and equatorial nodes, as previously reported (Fig 2A; [8,5]). By contrast,  
153 GFP-Mid1p in *vps4Δ* cells showed strikingly different patterns. Although cytoplasmic  
154 GFP-Mid1p was similar to wild-type, additional plasma membrane localization was  
155 observed (Fig 2B). In some cells, GFP-Mid1p localized to only one node and the  
156 plasma membrane, or localized to three nodes in other cells. The frequencies of  
157 these abnormal phenotypes in *vps4Δ* cells were compared with wild-type and  
158 showed significant differences (quantified in Fig 2C). Overall, GFP-Mid1p localization  
159 was significantly altered by the absence of *vps4*<sup>+</sup>.

160

161 These results, in addition to the observation that the *mid1* and *vps4* genes interact  
162 genetically, and further that the Mid1p and Vps4p physically interact *in vitro*, suggest  
163 that Mid1p and Vps4p coordinate to regulate the *S. pombe* cell cycle.

164

### 165 **Genetic and physical interactions between Mid1p and Ark1p in fission yeast**

166 We hypothesized that *mid1* and *ark1* genes interact to accomplish *S. pombe*  
167 cytokinesis, as we and others have shown that aurora kinases modulate ESCRT  
168 protein function [20,15]. To test this, both genetic and biochemical approaches were  
169 taken.

170

171 First, a *mid1Δ* strain was crossed with strains containing *ark1*-TS mutations to  
172 generate double *mid1Δ ark1*-TS mutant strains. The *mid1Δ ark1*-TS double mutant  
173 failed to form viable colonies (Fig 3A). Such a synthetic lethality indicates a genetic  
174 interaction between the *mid1* and *ark1* genes.

175

176 As with *mid1* and *vps4* such a genetic interaction might be explained by a physical  
177 interaction between Mid1p and Ark1p proteins. Since Ark1p is a protein kinase we  
178 tested whether Mid1p can be phosphorylated by aurora kinase, using an *in vitro*  
179 phosphorylation approach with recombinant Mid1p domains purified from *E. coli*.  
180 These experiments were performed with the human aurora kinases Aurora A, Aurora  
181 B, and the human polo kinase Plk1 (Fig 3B). Phosphorylation of both the "N-term"  
182 and "Middle" Mid1p domains by Aurora A and Plk1 was detected, but not by Aurora  
183 B (Fig 3B; Exp. B and Exp. C). In contrast, no phosphorylation was detected of the  
184 "C-term" Mid1p domain by any of the three kinases Aurora A, Aurora B or Plk1 (Fig  
185 3B; Exp. D). These results indicate that, at least *in vitro*, the "N-term" and "Middle"  
186 domains of Mid1p interact with and are phosphorylated by both Aurora A and Plk1  
187 kinases, while the "C-term" domain of Mid1p is not phosphorylated by Aurora A,  
188 Aurora B or Plk1.

189

### 190 **Ark1p is required for the correct cellular distribution of Mid1p**

191 To further analyse the interaction of Ark1p and Mid1p we examined the effect of two  
192 different temperature sensitive *ark1* mutants, *ark1-T11* and *ark1-T8*, on Mid1p  
193 distribution in cells (Fig 4).

194

195 In *ark1-T11* cells GFP-Mid1p showed wild-type phenotypes (Fig 4A). But in addition,  
196 new localization patterns were apparent, where GFP-Mid1p localization showed  
197 nuclear exclusion and appeared to be encircling the nucleus. The frequencies of  
198 these phenotypes were quantified and compared to wild-type cells revealing  
199 significant differences (Figs 4B). In *ark1-T8* cells GFP-Mid1p showed new additional  
200 localization patterns (Fig 4D). Cells were observed to be round and shorter than the



201 rod-shaped wild-type cells and GFP-Mid1p localization presented nuclear exclusion  
202 and encircled the nucleus. While some cells had one nucleus, others showed two,  
203 three, or even four nuclei. The frequencies of these phenotypes were quantified and  
204 compared to wild-type cells revealing significant differences (Figs 4E). These data  
205 support the hypothesis that Mid1p and Ark1p coordinate to regulate the *S. pombe*  
206 cell cycle.

207

### 208 **Identification of Mid1p amino acid residues phosphorylated by aurora and polo** 209 **kinases**

210 To further explore phosphorylation of Mid1p by aurora and polo kinases a mass  
211 spectrophotometry approach was used to identify phospho-acceptor sites. The "N-  
212 term" and "Middle" domains of Mid1p gel fragments from *in vitro* kinase assay  
213 reactions identical to those shown Fig 3B, but with non-labelled ATP, were excised  
214 and subjected to nano-scale liquid chromatographic tandem mass spectrometry  
215 (nLC-MS/MS) to generate a Mid1p phospho-site map (Fig 5). This analysis identified  
216 35 potential Mid1p residues phosphorylated by either Plk1 or Aurora A kinases (S2  
217 Table). In parallel we examined other published databases on fission yeast phospho-  
218 proteomes to refine and confirm the number of Mid1p phospho-sites. Most of these  
219 studies used a stable isotope labeling by amino acid in cell culture approach. We  
220 selected four studies which studied the *S. pombe* global proteome and identified  
221 several Mid1p specific phospho-sites [21-24].

222

223 The Mid1p phosphorylation events identified by mass spectrophotometry are  
224 summarized in S3 Table, alongside those described by the four published studies.  
225 The red highlighted residues represent overlap with the residues identified reported

226 here. The phospho-sites map shows a total of six potential phospho-sites distributed  
227 along the "N-term" and "Middle" Mid1p sequence, five of which were identified in this  
228 work, and the sixth was added from the published studies (Fig 5B). These are the  
229 serine residues S167, S328, S331, S332, S523 and S531.

230

231 To confirm the new phospho-sites identified in Mid1p, *in vitro* phosphorylation  
232 experiments involving bacterially expressed phospho-resistant mutant (serine to  
233 alanine) forms of the "N-term" and "Middle" domains of Mid1p with Aurora A and Plk1  
234 kinases were completed (Fig 6). These experiments revealed markedly reduced  
235 phosphorylation of the Mid1p phospho-resistant mutant S167A by both Aurora A and  
236 Plk1 kinases, and S523A by Aurora A alone. These observations support the  
237 suggestion that the S167 and S523 residues are phosphorylated by the Aurora A and  
238 Plk1 kinases, at least *in vitro*.

239

#### 240 **Biological relevance of amino acid residues phosphorylated by Ark1p and** 241 **Plo1p in Mid1p**

242 As another way to examine the role of the phospho-sites identified in Mid1p, we  
243 analysed the effect of their mutation *in vivo*. *S. pombe* cells exhibit morphology  
244 defects in the absence of Mid1p function. Therefore, we tested the effect of  
245 mutations of Mid1p phospho-sites in fission yeast on cell morphology to assay their  
246 relevance.

247

248 Versions of the *mid1* gene containing phospho-site mutations were generated and  
249 integrated in single copy into chromosomal DNA of *S. pombe mid1* $\Delta$  cells. Each  
250 version of the *mid1* gene had either a phospho-mimetic (S>D) or a phospho-resistant

251 (S>A) point mutation(s) of the residues S167, S328, S331, S332, S523 or S531 to  
252 create a panel of mutant *S. pombe* strains (S1 Fig). Such *mid1* mutations were made  
253 both singly and in combination. As a positive control we integrated the wild-type  
254 *mid1*<sup>+</sup> gene into *mid1*Δ cells to create *mid1*Δ pJK148:*mid1*<sup>+</sup>. This resulted in cells that  
255 behaved identically to wild-type both on solid medium and in liquid culture (Fig 7 and  
256 S1 Fig).

257

#### 258 *Mid1p phospho-mutants in mid1*Δ *cells*

259 Initial experiments examined in *mid1*Δ cells the effect of Mid1p phospho-mimetic or  
260 phospho-resistant mutations. Strains were grown on solid medium, with the formation  
261 of colonies observed in all cases. In most strains where serine was changed to either  
262 alanine or aspartic acid cell morphology appeared similar to wild-type (Fig 7, and  
263 data not shown). However, interestingly, *mid1* S332A cells (but not *mid1* S332D) had  
264 defects in morphology similar to those observed in *mid1*Δ cells, with slower growth at  
265 25°C (Fig 7). These data indicate a requirement of S332 for Mid1p function.

266

267 Furthermore, other phenotypes were revealed when certain Mid1p phospho-mutants  
268 were cultured in liquid medium. For example, *mid1* S523A and *mid1* S531A mutants  
269 displayed morphology defects (S2 Fig). In contrast, the equivalent phospho-mimetic  
270 mutants *mid1* S523D or *mid1* S531D did not.

271

#### 272 *Mid1p phospho-mutants in ark1-T11 cells*

273 To examine the role of Mid1p phosphorylation in its interaction with Ark1p, we  
274 crossed the strains containing phospho-mimetic/resistant versions of *mid1* with *ark1*-  
275 T11 mutant cells and searched for synthetic phenotypes in double mutants. Viable

276 colonies were observed in all cases with no synthetic phenotypes detected in most  
277 double mutants (data not shown). However, *mid1* S523A *ark1*-T11 and *mid1* S531A  
278 *ark1*-T11 double mutants showed cell morphology defects when cells were grown in  
279 liquid culture more severe than the single mutant strains (S3 Fig). These defects  
280 were not observed in the equivalent *mid1* S523D *ark1*-T11 or *mid1* S531D *ark1*-T11  
281 double mutants. The cell morphology defects observed in *mid1* S523A *ark1*-T11 and  
282 *mid1* S531A *ark1*-T11 double mutants were defined as loss of the rod-like shape of  
283 cells. This suggests a role for these two phospho-sites in Mid1p function during the  
284 *S. pombe* cell cycle to ensure medial division plane placement, and consequently  
285 equal sized and rod-shaped daughter cells.

286

#### 287 *Mid1p phospho-mutants in plo1-ts35 cells*

288 To examine the role of Mid1p phosphorylation in its interaction with Plo1p, we  
289 crossed strains containing phospho-mimetic/resistant versions of *mid1* with *plo1-ts35*  
290 mutant cells and searched for synthetic phenotypes in double mutants. Viable  
291 colonies were observed in all cases with no synthetic phenotypes detected for the  
292 majority of double mutants (data not shown). However, colony formation on solid  
293 medium was slower for *mid1* S332A *plo1-ts35* double mutants, and more severe cell  
294 morphology phenotypes were observed, compared to the single mutant strains (data  
295 not shown). These defects were not observed in the equivalent *mid1* S332D *plo1-*  
296 *ts35* double mutants. Such genetic interactions suggest a link between the regulation  
297 of Mid1p and Plo1p.

298

#### 299 *Mid1p phospho-mutants in vps4Δ cells*

300 To examine the role of Mid1p phosphorylation in its interaction with Vps4p, we  
301 crossed strains containing phospho-mimetic/resistant versions of *mid1* with *vps4Δ*  
302 mutant cells and searched for synthetic phenotypes in double mutants, Viable  
303 colonies were observed in all cases with no synthetic phenotypes detected (data not  
304 shown). However, colony formation on solid medium was slower for *mid1* S523D  
305 S531D *vps4Δ* double mutants, and more severe cell morphology phenotypes were  
306 observed, compared to the single mutant strains. Strikingly, cells had defects in  
307 morphology similar to those observed in *mid1Δ* cells (Fig 8). The same serine  
308 residues changed to alanine S523A or S531A had no such effect when combined  
309 with *vps4Δ* (data not shown). These genetic interactions suggest a link between the  
310 regulation of Mid1p by both Vps4p and Ark1p.

311

## 312 Discussion

313 In fission yeast the Mid1p protein has important roles during cytokinesis during the  
314 cell cycle, with anillin homologues having similar roles in higher eukaryotes. These  
315 roles centre around its structural role in predicting and controlling the site of cell  
316 division in the equatorial region of the cell. Here we have identified new classes of  
317 proteins with which Mid1p interacts, and explored the mechanism by which these  
318 proteins cooperate and regulate each other and cell growth/morphology.

319

### 320 *Mid1p and Vps4p*

321 Genetic and biochemical approaches revealed a direct physical interaction of Mid1p  
322 with the ESCRT-associated protein Vps4p. Furthermore, we demonstrated that a  
323 chromosomal deletion of the *vps4<sup>+</sup>* gene caused defects in the cellular localization of  
324 GFP-Mid1p. These defects included mis-localization of nodes whereby one node is

325 randomly positioned, or three nodes were present. This suggests a role of Vps4p in  
326 the Mid1p-dependent node localization pathway, which led us to hypothesize that the  
327 function of Mid1p is regulated by Vps4p during nodes attachment to the plasma  
328 membrane (Fig 9).

329

330 Two types of nodes are involved in *S. pombe* actomyosin ring assembly and  
331 contraction (Fig 9). Mid1p cortical anchorage first drives the recruitment of  
332 cytokinesis proteins, then interactions with myosin filaments causes the  
333 condensation of nodes into the actomyosin ring. Mid1p cortical anchorage depends  
334 on the PH domain [13] and its potential interaction with Vps4p might stabilize this  
335 interaction. Since Vps4p physically interacts with residues within the C-terminal  
336 domain of Mid1p, which contains membrane binding motifs, we speculate that Vps4p  
337 may facilitate Mid1p cortical anchorage to promote *S. pombe* medial division.

338

339 We suggest that a physical interaction between Vps4p and Mid1p regulates Mid1p-  
340 dependent node attachment to the plasma membrane to determine the division plane  
341 in *S. pombe*, and that this interaction directly or indirectly involves Mid1p PH domain  
342 cell cortex anchorage (Fig 9). It is interesting to note that the domain of Mid1p that  
343 interacts with Vps4p *in vitro* (Fig 1) contains the PH domain, suggesting that binding  
344 of Vps4p to this region may regulate interaction with the cell cortex (Fig 9).

345

#### 346 *Phosphorylation of Mid1p*

347 Genetic and biochemical approaches revealed a direct physical interaction of Mid1p with the  
348 aurora kinase, Ark1p, with Aurora A phosphorylating Mid1p the "N-term" and "Middle"  
349 domains. Mapping of the amino acids in Mid1p phosphorylated *in vitro* by Aurora A  
350 and Plk1 revealed 35 potential phospho-sites, with some of these sites independently

351 identified in four *S. pombe* global proteomic studies (Fig 5). Such combined analysis  
352 suggested six potential phospho-sites in Mid1p: S167, S328, S331, S332, S523 and  
353 S531. Subsequent *in vitro* kinase assay experiments confirmed the *in vitro* phosphorylation  
354 of S167, S331 and S523 phospho-sites of Mid1p by Aurora A and Plk1 kinases (Fig 6).

355

356 To complement these studies, we examined the effect of mutations of these  
357 phospho-sites *in vivo* on cell morphology in wild-type, *ark1-T11*, *plo1-ts35* and *vps4Δ*  
358 *S. pombe* cells. In wild-type cells defective cell morphology phenotypes were  
359 observed for the phospho-mimetic mutants S332, S523 and S531 (Fig 7). These  
360 were exacerbated when combined with mutations in *ark1*, *plo1* and *vps4* (Fig 8).

361 Therefore, we conclude that the phosphorylation of these amino acid residues is  
362 important for Mid1p function and its interaction with these proteins to regulate cell  
363 cycle events. It is tempting to speculate that the interaction of Mid1p and Vps4p is  
364 regulated by the activity of Ark1p and/or Plo1p, but it is important to note that the  
365 regions of Mid1p phosphorylated by these kinases do not include the binding region  
366 for Vps4p. Clearly, phosphorylation in adjacent regions may modulate binding via  
367 conformational changes in Mid1p, as regions containing the phospho-acceptor sites  
368 have been shown to regulate the interaction of Mid1p with other proteins, including  
369 Plo1p and Sid1p. Plo1p phosphorylates residues within the first 100 amino acids of  
370 Mid1p to trigger Myosin II recruitment during contractile ring assembly [25]. Later at  
371 contractile ring constriction Sid1p phosphorylates Mid1p to facilitate its export from  
372 the cell cortex [7]. Future experiments will be aimed at unraveling how the Mid1p  
373 interactome is modified both by association with Vps4p and by phosphorylation by  
374 mitotic kinases.

375

## 376 **Materials and Methods**

### 377 *Yeast media and general techniques*

378 General molecular procedures were performed, with standard methodology and  
379 media used for the manipulation of *S. pombe* [26,27]. The yeast strains used in this  
380 study are shown in S1 Table. Cells were routinely cultured using liquid or solid  
381 complete (YE) or minimal (EMM) medium, at 25°C or 30°C.

382

### 383 *DNA constructs*

384 The DNA constructs used in this study are listed in S2 Table. Some were  
385 synthesized and cloned by either GenScript or Invitrogen. All constructs were  
386 sequenced before use.

387

### 388 *Bacterial expression DNA constructs*

389 Four fragments of the *mid1*<sup>+</sup> gene encoding the amino acids 1-453 "N-terminus",  
390 452-579 "Middle", 578-799, 798-920 "C-term" [19] were synthesized and cloned into  
391 *Bam* HI/*Xho* I of pGEX-4T-1. Full-length *vps4*<sup>+</sup> was synthesized and cloned into *Nde*  
392 *I/Bam* HI of pET-14b. The C-terminal domain of *myo2*<sup>+</sup> was synthesized and cloned  
393 into *Nde I/Bam* HI of pET-14b.

394

### 395 *mid1* phospho-mimetic/resistant mutants

396 Eighteen versions of the *mid1* gene with different phospho-mimetic/resistant  
397 mutations were synthesized, along with a wild-type *mid1*<sup>+</sup> control. All had the wild-  
398 type *mid1*<sup>+</sup> promoter in ~1 kbp of DNA upstream of *mid1*<sup>+</sup> open reading frame, and  
399 were each cloned into *Kpn I/Sac I* of pJK148. Integration of the pJK148:*mid1* genes  
400 (1-19) into *S. pombe mid1*Δ cells was through homologous recombination after



401 linearization of pJK148:*mid1* with *Nde* I in the *leu1*<sup>+</sup> gene. The resulting panel of  
402 phospho-mimetic/resistant mutant strains is listed in S1 Table and S1 Fig.

403

#### 404 *Recombinant protein purification*

405 GST-Mid1p, 6His-Vps4p or 6His-C-term Myo2p plasmids were grown in BL21 *E. coli*  
406 until an OD of 0.6-0.8, with protein production induced by adding 1 mM IPTG. Mid1p  
407 578-799 was not found to be expressed under these conditions, and so was not used  
408 for further experiments.

409

410 Bacterial pellets were produced by centrifugation with cells re-suspended in 20 ml re-  
411 suspension buffer with EDTA free protease inhibitors; for GST-Mid1p fusion proteins  
412 PBS buffer (137 mM NaCl, 2.7 mM KCl, 10 mM Na<sub>2</sub>HPO<sub>4</sub> and 1.8 mM KH<sub>2</sub>PO<sub>4</sub>, pH  
413 7.4) was used, whereas for 6His-Vps4p, HEPES buffer (25 mM HEPES, 400 mM KCl  
414 and 10% (v/v) glycerol, pH 7.4) was used. Cells were then lysed by sonication, where  
415 a final concentration of 1 mg ml<sup>-1</sup> lysozyme was added for cell wall digestion followed  
416 by sonication, with 0.1 % (v/v) Triton X-100 added prior to lysis. A clear lysate was  
417 produced by centrifugation. GST-tagged fusion proteins were purified using 1ml l<sup>-1</sup>  
418 glutathione beads in PBS buffer, while 6His-tagged Vps4p or C-term Myo2p were  
419 purified using 500 µl l<sup>-1</sup> Ni-NTA beads in HEPES buffer, either for 2 h or overnight at  
420 4°C. Mid1p was eluted from glutathione beads using Reduced glutathione buffer.  
421 Vps4p or C-term Myo2p were washed and eluted from Ni-NTA beads using HEPES  
422 buffers. Elution was carried out for 2 h at 4°C. Samples of proteins from each step  
423 were subjected to SDS-PAGE to determine elution efficiency.

424

#### 425 *Pull-down experiments*

426 Pull-down experiments utilized Ni-NTA beads-immobilized bait proteins (6His-Vps4p  
427 or 6His- C-term Myo2p) and prey-eluted proteins (GST-Mid1p: “N-terminus”, “Middle”  
428 or “C-terminus”) to investigate protein-protein interactions. Bait proteins xx ug were  
429 loaded onto Ni-NTA beads by incubation in PBS containing 0.01% (v/v) Triton X-100  
430 for 1 h (4°C). After loading, the mixture was washed with PBS containing 0.01% (v/v)  
431 Triton X-100, and beads were blocked for non-specific binding by incubation in PBS  
432 containing 0.2% fish-skin gelatin. The beads mixture was incubated with yy ug prey  
433 protein in PBS with 0.01% (v/v) Triton X-100. Subsequently, beads were washed with  
434 PBS containing 0.01% (v/v) Triton X-100 three times, 0.5% (v/v) glycerol and 0.2%  
435 (w/v) fish skin gelatin three times, and with PBS alone four times. Proteins were  
436 eluted from beads by boiling in Laemmli sample buffer (LSB) (75 mM Tris pH 6.8,  
437 12% (w/v) SDS, 60% (v/v) glycerol, 600 mM DTT and 0.6% (w/v) Bromophenol Blue)  
438 and samples were subjected to SDS-PAGE.

439

#### 440 *In vitro kinase assays*

441 Assays combined either human Plk1 (0.023 µg/µl), Aurora A (0.01 µg/µl), Aurora B  
442 (0.01 µg/µl) and myelin basic protein (MBP; 2.5 µg) (Sigma-Aldrich and Biaffin  
443 GmbH) or one of the three Mid1p domains (“N-term”, “Middle” or “C-term” 2.5 µg).  
444 Kinase, substrate proteins, 1 µCi [ $\gamma$ -<sup>32</sup>P] ATP, 10 mM ATP and kinase assay buffer  
445 (25 mM MOPS, 25 mM MgCl<sub>2</sub>, 1 mM EDTA and 0.25 mM DTT, pH 7.2) were mixed  
446 in a total volume of 20 µl; the reaction was initiated by adding 5 µl ATP cocktail and  
447 incubated at 30°C for 1 h and terminated by the addition of LSB; samples were  
448 subjected to SDS-PAGE followed by autoradiography or phospho-imaging. Following  
449 detection of *in vitro* phosphorylation signals, mass spectrometric analysis was carried

450 out by the Dundee FingerPrints Proteomics service

451 (<http://proteomics.lifesci.dundee.ac.uk/>).

452

### 453 *Confocal and light microscopy*

454 Septation and GFP studies were carried out by visualizing *S. pombe* using

455 calcofluor-white stain and fluorescence microscopy, respectively. *S. pombe* cells

456 were cultured in 50 ml YE shaking at 28°C (25°C for *ark1*-TS strains) for 18 hours.

457 Cell septa were visualized using bright field and DAPI filters of a Zeiss Axiovert 135

458 fluorescent microscope equipped with a Zeiss 63X Plan-APOCHROMAT oil-

459 immersion objective lens. GFP-tagged *mid1*<sup>+</sup> [28] was examined by a He/Ne and Ag

460 laser system of Zeiss LSM microscope using 63X high NA objective lens. Cell

461 images were collected using Zeiss Pascal software and processed using ImageJ,

462 Microsoft PowerPoint and Keynote software. Numerical analysis was completed from

463 three independent experiments where 200-250 cells were counted. Yeast colonies

464 grown on solid medium were imaged using a Zeiss Axioscope microscope and a

465 Sony DSC-75 camera.

466

### 467 **Acknowledgements**

468 We thank Anne Paoletti, Tomoko Iwaki and Silke Hauf for sharing fission yeast

469 strains used in this study. We thank Ian Salt for his contribution to this project, both

470 with experimental and practical advice. We acknowledge the following for

471 contributions to experiments: Rianne Cort, Laura Downie, Bethany Hutton, Christina

472 Jack, Jack Goddard, Susan McGill, Mark McLean, Chiamaka Okoli, Elena Pescuma,

473 Liam Pollock, James Provan, John Riddell, Aizhan Shagadatova, Ellen Shercliff,

474 Haoying Wang, and Wandiahyel Yaduma.

475

476 **References**

- 477 1. Hoffman C S, Wood V, Fantes P A. An ancient yeast for young geneticists: a  
478 primer on the *Schizosaccharomyces pombe* model system. Genetics 2015; 201:  
479 403-423.
- 480 2. Willet A H, McDonald N A, Gould K L. Regulation of contractile ring formation  
481 and septation in *Schizosaccharomyces pombe*. Curr Opin Microbiol. 2015; 28:  
482 46-52.
- 483 3. Simanis V. Pombe's thirteen - control of fission yeast cell division by the  
484 septation initiation network. J. Cell Sci. 2015; 128: 1465-1474.
- 485 4. Tomlin G C, Morrell J L, Gould K L. The spindle pole body protein Cdc11p  
486 links Sid4p to the fission yeast septation initiation network. Mol. Biol. Cell.  
487 2002; 13: 1203-1214.
- 488 5. Akamatsu M, Berro J, Pu K M, Tebbs I R, Pollard T D. Cytokinetic nodes in  
489 fission yeast arise from two distinct types of nodes that merge during  
490 interphase. J. Cell Biol. 2014; 204: 977-988.
- 491 6. Sparks C A, Morphey M, McCollum D. Sid2p, a spindle pole body kinase that  
492 regulates the onset of cytokinesis. J. Cell. Biol. 1999; 146: 777-790.
- 493 7. Willet A H, DeWitt A K, Beckley J R, Clifford D M, Gould K L. NDR kinase Sid2  
494 drives Anillin-like Mid1 from the membrane to promote cytokinesis and medial  
495 division site placement. Curr. Biol. 2019; 29: 1055-1063.e2.
- 496 8. Paoletti A, Chang F. Analysis of mid1p, a protein required for placement of the  
497 cell division site, reveals a link between the nucleus and the cell surface in  
498 fission yeast. Mol. Biol. Cell. 2000; 11: 2757-2773.

- 499 9. Hachet O, Simanis V. Mid1p/anillin and the septation initiation network  
500 orchestrate contractile ring assembly for cytokinesis. *Genes Dev.* 2008; 22:  
501 3205-3216.
- 502 10. Almonacid M, Moseley J B, Janvare J, Mayeux A, Fraiser V, Nurse P, Paoletti  
503 A. Spatial control of cytokinesis by Cdr2 kinase and Mid1/Anillin nuclear  
504 export. *Curr. Biol.* 2009; 19: 961-966.
- 505 11. Chang F, Woollard A, Nurse P. Isolation and characterization of fission yeast  
506 mutants defective in the assembly and placement of the contractile actin ring.  
507 *J. Cell Sci.* 1996; 109: 131-142.
- 508 12. Saha S, Pollard T D. Anillin-related protein Mid1p coordinates the assembly of  
509 the cytokinetic contractile ring in fission yeast. *Mol. Biol. Cell.* 2012a; 23:  
510 3982-3992.
- 511 13. Sun L, Guan R, Lee I J, Liu Y, Chen M, Wang J, et al. Mechanistic insights  
512 into the anchorage of the contractile ring by Anillin and Mid1. *Dev. Cell.* 2015;  
513 33: 413-426.
- 514 14. Bhutta M S, McInerney C J, Gould G W. ESCRT function in cytokinesis:  
515 location, dynamics and regulation by mitotic kinases. *Int. J. Mol. Sci.*  
516 2014a; 15: 21723-21739.
- 517 15. Bhutta M S, Roy B, Gould G W, McInerney C J. A complex network of  
518 interactions between mitotic kinases, phosphatases and ESCRT proteins  
519 regulates septation and membrane trafficking in *S. pombe*. *PLoS ONE* 2014b;  
520 9: e111789.
- 521 16. Rincon S A, Paoletti A. Mid1/anillin and the spatial regulation of cytokinesis in  
522 fission yeast. *Cytoskeleton* 2012; 69: 764-777.

- 523 17. Iwaki T, Onishi M, Ikeuchi M, Kita A, Sugiura R, Giga-Hama Y, et al. Essential  
524 roles of class E Vps proteins for sorting into multivesicular bodies in  
525 *Schizosaccharomyces pombe*. *Microbiology* 2007; 153: 2753-2764.
- 526 18. Chatterjee M, Pollard T D. The functionally important N-terminal half of fission  
527 yeast Mid1p anillin is intrinsically disordered and undergoes phase separation.  
528 *Biochemistry* 2019; 58: 3031-3041.
- 529 19. Saha S, Pollard T D. Characterization of structural and functional domains of  
530 the anillin-related protein Mid1p that contribute to cytokinesis in fission yeast.  
531 *Mol. Biol. Cell.* 2012b; 23: 3993-4007.
- 532 20. Carlton J G, Caballe A, Agromayor M, Kloc M, Martin-Serrano J. ESCRT-III  
533 governs the Aurora B-mediated abscission checkpoint through CHMP4C.  
534 *Science* 2012; 336: 220-225.
- 535 21. Koch A, Krug K, Pengelley S, Macek B, Hauf S. Mitotic substrates of the  
536 kinase Aurora with roles in chromatin regulation identified through quantitative  
537 phosphoproteomics of fission yeast. *Sci. Signal.* 2011; 4: rs6-rs6.
- 538 22. Carpy A, Krug K, Graf S, Koch A, Popic S, et al. Absolute proteome and  
539 phosphoproteome dynamics during the cell cycle of *Schizosaccharomyces*  
540 *pombe* (fission yeast). *Mol. Cell. Proteomics* 2014; 13: 1925-1936.
- 541 23. Kettenbach A N, Deng L, Wu Y, Baldissard S, Adamo M E, Gerber S A,  
542 Moseley J B. Quantitative phosphoproteomics reveals pathways for  
543 coordination of cell growth and division by the conserved fission yeast kinase  
544 Pom1. *Mol. Cell. Proteom.* 2015; 14: 1275-1287.
- 545

- 546 24. Swaffer M P, Jones A W, Flynn H R, Snijders A P, Nurse P. Quantitative  
547 phosphoproteomics reveals the signaling dynamics of cell-cycle kinases in the  
548 fission yeast *Schizosaccharomyces pombe*. Cell Rep. 2018; 24: 503-514.
- 549 25. Almonacid M, Celton-Morizur S, Jakubowski J L, Dingli F, Loew D, Mayeux A,  
550 et al. Temporal control of contractile ring assembly by Plo1 regulation of  
551 Myosin II recruitment by Mid1/Anillin. Curr. Biol. 2011; 21: 473-479.
- 552 26. Moreno S, Klar A, Nurse P. Molecular genetic analysis of fission yeast  
553 *Schizosaccharomyces pombe*. Methods Enzymol. 1991; 194: 795-823.
- 554 27. Rezig I M, Bremner S K, Bhutta M S, Salt I P, Gould G W, McInerny C J.  
555 Genetic and cytological methods to study ESCRT cell cycle function in fission  
556 yeast. Methods Mol. Biol. 2019; 1998: 239-250.
- 557 28. Bähler J, Steever A B, Wheatley S, Wang Y I, Pringle J R, Gould K L,  
558 McCollum D. Role of polo kinase and Mid1p in determining the site of cell  
559 division in fission yeast. J. Cell Biol. 1998; 143: 1603-1616.

560

## 561 **Figure legends**

### 562 **Fig 1. Genetic and physical interactions between *mid1* and *vps4* in fission**

563 **yeast. (A)** Synthetic lethality in *mid1* $\Delta$  *vps4* $\Delta$  double mutant cells indicates a genetic

564 interaction between the *mid1* and *vps4* genes. Tetrad analysis of h<sup>-</sup> *vps4* $\Delta$

565 (*vps4::ura4*<sup>+</sup>) mated with h<sup>+</sup> *mid1* $\Delta$  (*dmf1::KanMX4*) to identify *vps4* $\Delta$  *mid1* $\Delta$  double

566 mutants that show a synthetic lethal growth phenotype. Tetrads created by mating

567 the two strains on solid ME medium, four spores dissected and allowed to grow on

568 solid YE medium until colonies formed. Colonies replicated to solid

569 YE+G418/KanMX4 and EMM-ura media and incubated to identify growth phenotypes

570 and double mutants. **(B)** Direct physical interaction between Vps4p and the "C-term"

571 domain of Mid1p. Recombinant GST-tagged (Mid1p domains: "N-term" (aa 1-453),  
572 "Middle" (452-579) and "C-term" (793-920)) and 6 His-tagged (Vps4p and "C-term"  
573 Myo2p) proteins were expressed in *E. coli* and purified using GST-sepharose beads  
574 and Ni-NTA agarose beads, respectively. Exp. A, eluted prey Mid1p domains were  
575 added to bait Vps4p bound to Ni-NTA agarose beads: (\*) represents physical  
576 interaction of Vps4p and Mid1p "C-term" domain. Exp. B, eluted prey Mid1p "N-term"  
577 and "Middle" domains were added to bait Myo2p bound to Ni-NTA agarose beads as  
578 a positive control: (\*\*) represents physical interaction of Mid1p "N-term" and "Middle"  
579 domains with "C-term" domain of Myo2p (left panel). The 14.5 kDa "C-term" Myo2p  
580 was not detected in this gel; in a separate experiment (right panel) the detected 14.5  
581 kDa "C-term" Myo2p is shown. Asterisks (\*\*) indicate detected physical interactions  
582 of Mid1p "N-term" and "Middle" domains with "C-term" domain of Myo2p. Coloured  
583 boxes represent predicted proteins: Vps4p purple, Mid1p "N-term" red, Plk1 purple,  
584 Mid1p "Middle" green and Mid1p "C-term" dark blue.

585

586 **Fig 2. GFP-Mid1p cellular localization is disrupted in *vps4Δ* cells.** Wild-type (W-  
587 T) and *vps4Δ* (*vps4::ura<sup>+</sup>*) *S. pombe* strains containing GFP-Mid1p grown at 25°C in  
588 liquid YE medium to mid-exponential phase and visualized by confocal microscopy.  
589 **(A)** Key to characterised GFP-Mid1p localization phenotypes. Scale bar, 5 μm. Bright  
590 and green fluorescent images of cells (left) and quantitative analysis (right) of GFP-  
591 Mid1p localization phenotypes for wild-type (W-T) **(B)** and *vps4Δ* **(C)** cells. Scale bar,  
592 10 μm. **(D)** Two-way ANOVA analysis of frequencies of localization phenotypes in  
593 *vps4Δ* compared to wild-type (W-T). Asterisks (\*\*\*\*) denote *p* values <0.0001  
594 indicating significant differences to wild-type. Error bars, SEM.

595



596 **Fig 3. Genetic and physical interactions between *mid1* and *ark1* in fission**  
597 **yeast. (A)** Synthetic lethality in *mid1* $\Delta$  *ark1*-T11 double mutant cells indicates genetic  
598 interaction between *mid1*<sup>+</sup> and *ark1*<sup>+</sup> genes. Tetrad analysis of h<sup>+</sup> *ark1*-T11 (*ark1*-  
599 T11<<Kan<sup>R</sup>) crossed with h<sup>-</sup> *mid1* $\Delta$  (*mid1*::*ura*<sup>+</sup>) to identify *mid1* $\Delta$  *ark1*-T11 double  
600 mutants that show a synthetic lethal growth phenotype. Tetrads created by mating  
601 the two strains on solid ME medium, four spores dissected and allowed to grow on  
602 solid YE medium until colonies formed. Colonies replicated to solid  
603 YE+G418/KanMX4 and EMM-ura media and incubated to identify growth phenotypes  
604 and double mutants. **(B)** Plk1 and Aurora A kinases phosphorylate Mid1p "N-term"  
605 and "Middle" domains. Recombinant GST-tagged Mid1p domain proteins "N-term"  
606 (aa 1-453), "Middle" (452-579) and "C-term" (798-920) were purified and analysed by  
607 *in vitro* phosphorylation assays. In "Exp. A" myelin basic protein (MBP) was a  
608 positive control. In "Exp. B", "Exp. C" and "Exp. D" the "N-term", "Middle" and "C-  
609 term" domains of Mid1p were substrates with the kinases Plk1, Aurora A or Aurora B,  
610 respectively. Asterisks (\*) indicate detected *in vitro* phosphorylation signals. Coloured  
611 boxes represent predicted proteins: MBP yellow, Mid1p "N-term" species red, and  
612 Mid1p "Middle" species green.

613

614 **Fig 4. GFP-Mid1p cellular localization is disrupted in *ark1*-T11 and *ark1*-T8**  
615 **cells.** Wild-type (W-T), *ark1*-T11 and *ark1*-T8 *S. pombe* strains containing GFP-  
616 Mid1p were grown at 25°C in liquid YE medium to mid-exponential phase and  
617 visualized by confocal microscopy. **(A)** Key to characterised GFP-Mid1p localization  
618 phenotypes. Scale bar, 5  $\mu$ m. Bright and green fluorescent images of cells (left) and  
619 quantitative analysis of GFP-Mid1p localisation phenotypes (right) for *ark1*-T11 **(B)**  
620 and *ark1*-T8 **(D)**. Scale bar, 10  $\mu$ m. **(C, E)** Two-way ANOVA analysis of frequencies

621 of localization phenotypes in *ark1*-T11 and *ark1*-T8 compared to wild-type (W-T).  
622 Asterisks (\*\*\*\*) denote *p* values <0.0001 indicating a significant difference to wild-  
623 type. Error bars = SEM.

624

625 **Fig 5. Identification of Mid1p phospho-sites by mass-spectrometry analysis**  
626 **(MSA) and published studies. (A)** Mid1p full-length amino acid sequence with "N-  
627 term" and "Middle" domains indicated in red and green. Highlighted peptides show  
628 35 phosphorylated amino acid residues identified by MSA of *in vitro* phosphorylation  
629 reactions for the kinases Plk1 (bold), Aurora A (underlined) or both (bold and  
630 underlined). **(B)** Five Mid1p phospho-sites generated from comparison of the 35  
631 MSA amino acids with Mid1p phosphorylated amino acids identified in four published  
632 proteomic studies [21-24]. Amino acids identified by MSA and four independent  
633 studies (pink), MSA and three studies (light blue), and MSA and two studies (dark  
634 blue and orange). Asterisk (\*) indicates a sixth serine phospho-site at position 531  
635 derived from [23] and [24].

636

637 **Fig 6. Reduced *in vitro* phosphorylation of Mid1p "N-term and "Middle"**  
638 **phospho-resistant mutants by Plk1 and Aurora A kinases.** Recombinant GST-  
639 tagged Mid1p "N-term" **(A)** and "Middle" **(B)** domains phospho-resistant mutants  
640 were expressed and purified in *E. coli*. Proteins subjected to *in vitro* phosphorylation  
641 experiments with Aurora A (Exp. A) or Plk1 (Exp. B) kinases. Asterisks (\* and \*\*)   
642 indicate wild-type Mid1p "N-term" and Mid1p "Middle" recombinant proteins used as  
643 positive controls. Coloured boxes represent predicted proteins: MBP yellow, Mid1p  
644 "N-term" species red, Plk1 purple, and all Mid1p "Middle"-related species green.  
645 "Multiple" indicates mutations in all four phospho-sites.

646

647 **Fig 7. The S332 phospho-site is required for Mid1p function.** Three phospho-  
648 resistant *mid1* mutant strains *mid1* S332A, *mid1* S167A S328A S331A S332A, and  
649 *mid1* S167A S328A S331A S332A S523A S531A, and the three phospho-mimetic  
650 mutants *mid1* mutant strains S332D, *mid1* S167D S328D S331D S332D, and *mid1*  
651 S167D S328D S331D S332D S523D S531D streaked to single colonies on solid YE  
652 at 25°C to compare growth rates **(A)** and colony morphology **(B)**. Controls: *mid1*Δ  
653 and wild-type (W-T) cells. Scale bar, 10 μm.

654

655 **Fig 8. The Mid1p S523 and S531 phospho-sites regulate its interaction with**  
656 **Vps4p.** Strains streaked to single colonies on solid YE medium and grown at 25° to  
657 compare growth rates and colony morphology. Controls: *vps4*Δ and wild-type (W-T)  
658 cells. Scale bar, 10 μm.

659

660 **Fig 9. Interaction of Mid1p and Vps4p to regulate *S. pombe* septation. (A)**  
661 Schematic representation of Mid1p localization during *S. pombe* cell cycle stages.  
662 CR = contractile ring. **(B)** Mid1p is phosphorylated by Plo1p to promote mitotic entry,  
663 during which Rng2p and other proteins interact with the N-terminal domain of Mid1p.  
664 **(C)** In mitosis, Mid1p forms nodes which are attached to the plasma membrane via  
665 the lipid binding motifs present within the Mid1p C-terminal domain. Green box  
666 represent the overall structure of Mid1p C-terminal region (aa 579-920) containing:  
667 the C2 domain (cyan), the connector domain (red) and the PH domain (yellow);  
668 dotted lines represent the lipid binding loop. Structure adapted from [13]. The Vps4p  
669 interaction with the C-terminal domain of Mid1p potentially regulates this process.

670

671 **S1 Fig. Summary of Mid1p phospho-mimetic/resistant fission yeast mutant**

672 **strains used in this study.** Top Panel: full length Mid1p with S167, S328, S331,

673 S332, S523 and S531 phospho-sites indicated. Lower Panel: summary of single or

674 combinatorial ("Multi") phospho-mimetic or phospho-resistant mutations of the *mid1*

675 gene, to generate eighteen versions integrated into *mid1* $\Delta$  cells, with each yeast

676 strain given a "GG" lab collection number.

677

678 **S2 Fig. *mid1* phospho-resistant/mimetic mutants reveal cell division**

679 **phenotypes.** Wild-type (W-T), *mid1* $\Delta$ , *mid1* $\Delta$  pJK148:*mid1*<sup>+</sup>, *mid1* $\Delta$

680 pJK148:*mid1*S523A, *mid1* $\Delta$  pJK148:*mid1*S523D, *mid1* $\Delta$  pJK148:*mid1*S531A, *mid1* $\Delta$

681 pJK148:*mid1*S531D, *mid1* $\Delta$  pJK148:*mid1*S523A S531A and *mid1* $\Delta$

682 pJK148:*mid1*S523D S531D strains grown at 25°C in liquid YE medium to mid-

683 exponential phase. Cells visualized by confocal microscopy under bright field. Scale

684 bar, 10  $\mu$ m. Characterised cell morphology phenotypes indicated by red arrows. **(A)**

685 Two-way ANOVA analysis of frequencies of localization phenotypes in wild-type (W-

686 T), *mid1* $\Delta$  and *mid1* $\Delta$  pJK148:*mid1*<sup>+</sup> cells. **(B)** Key to characterised cell morphology

687 phenotypes. Scale bar, 5  $\mu$ m. **(C-E)** Two-way ANOVA analysis of frequencies of

688 localization phenotypes of *mid1* phospho-resistant/mimetic mutants. Asterisks (\*\*\*\*)

689 denote *p* values <0.0001 indicating significant difference to wild-type. Error bars =

690 SEM.

691

692 **S3 Fig. *mid1* phospho-resistant/mimetic *ark1*-T11 double mutants reveal cell**

693 **division phenotypes.** *ark1*-T11, *mid1* $\Delta$  *ark1*-T11 pJK148:*mid1*<sup>+</sup>, *mid1* $\Delta$  *ark1*-T11

694 pJK148:*mid1*S523A, *mid1* $\Delta$  *ark1*-T11 pJK148:*mid1*S523D, *mid1* $\Delta$  *ark1*-T11

695 pJK148:*mid1*S531A, *mid1* $\Delta$  *ark1*-T11 pJK148:*mid1*S531D, *mid1* $\Delta$  *ark1*-T11

696 pJK148:*mid1*S523A S531A and *mid1*Δ *ark1*-T11 pJK148:*mid1*S523D S531D strains  
697 grown at 25°C in liquid YE medium to mid-exponential phase. Cells visualized by  
698 confocal microscopy under bright field. Scale bar, 10 μm. Characterised cell  
699 morphology phenotypes indicated by red arrows. **(A)** Two-way ANOVA analysis of  
700 frequencies of localization phenotypes in wild-type (W-T), *ark1*-T11 and *mid1*Δ  
701 pJK148:*mid1*<sup>+</sup> *ark1*-T11 cells. **(B)** Key to characterised cell morphology phenotypes.  
702 Scale bar, 5 μm. **(C-E)** Two-way ANOVA analysis of frequencies of localization  
703 phenotypes in wild-type (W-T), *mid1* phospho-resistant/mimetic and *ark1*-T11 cells.  
704 Asterisks (\*\*\*\*) denote *p* values <0.0001 indicating significant difference to wild-type.  
705 Error bars = SEM.

# *mid1* $\Delta$ X *vps4* $\Delta$ Tetrads

(A)

bioRxiv preprint doi: <https://doi.org/10.1101/2019.12.13.875211>; this version posted December 13, 2019. The copyright holder for this preprint (which was not certified by peer review) is the author/funder, who has granted bioRxiv a license to display the preprint in perpetuity. It is made available under aCC-BY 4.0 International license.

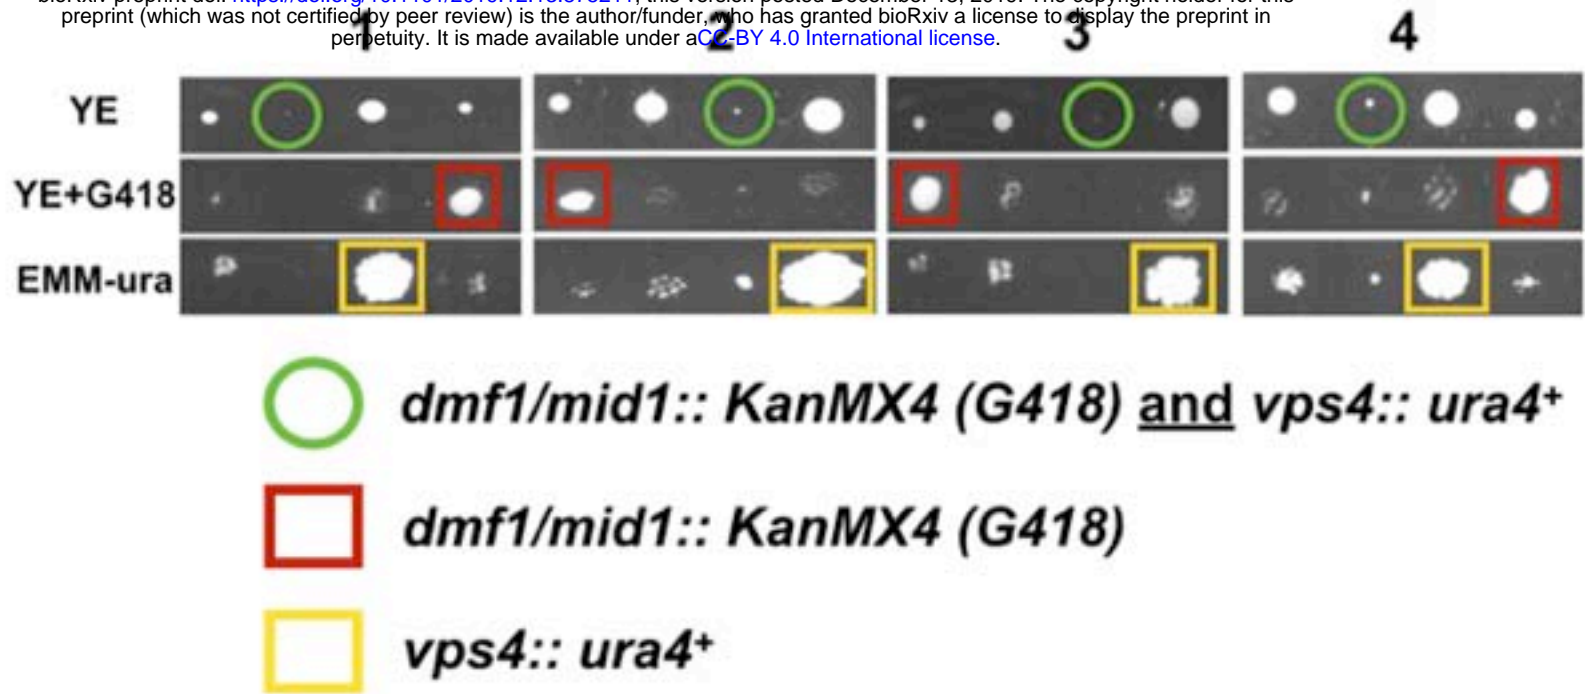

(B)

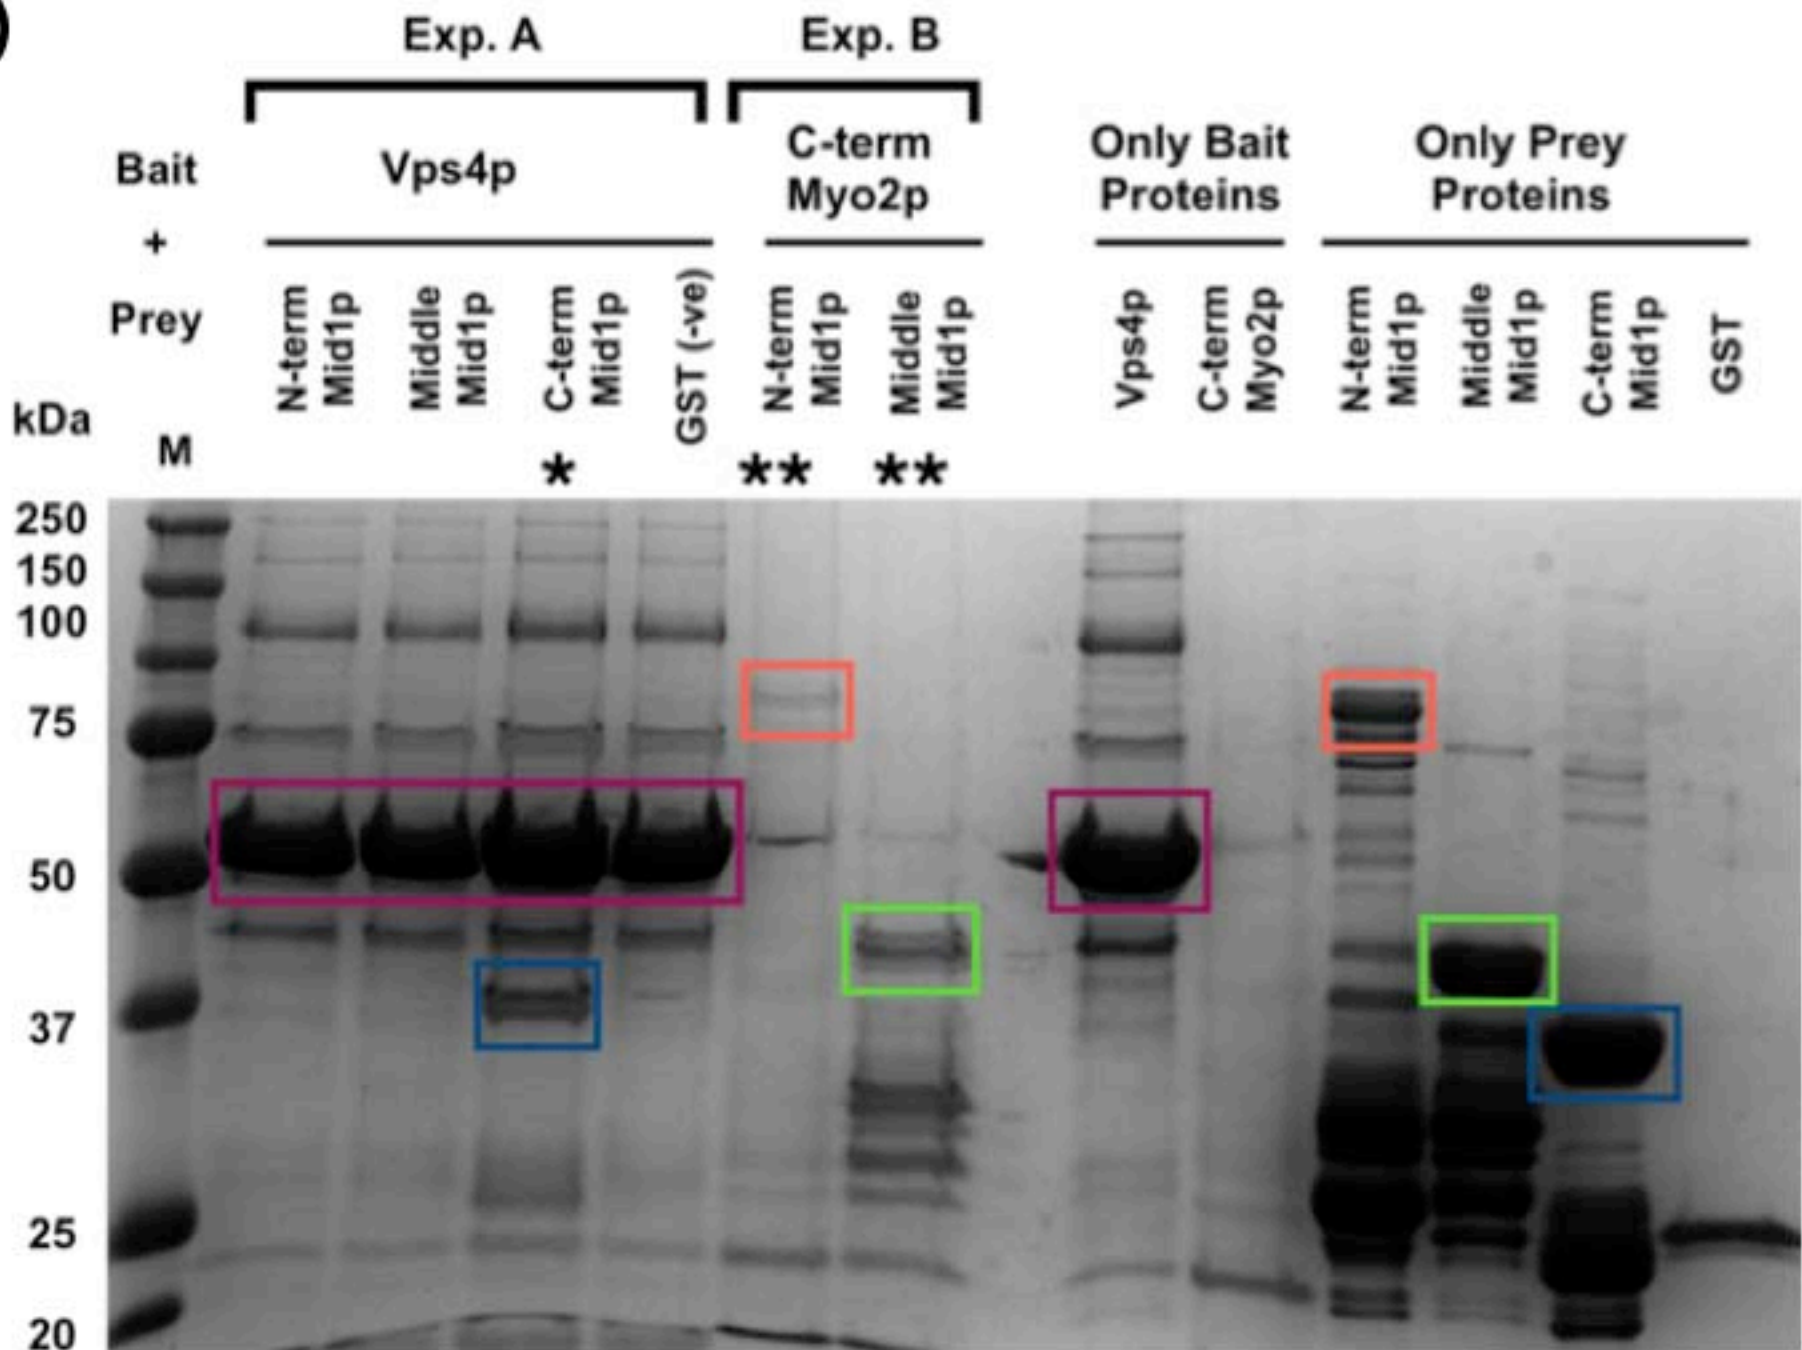



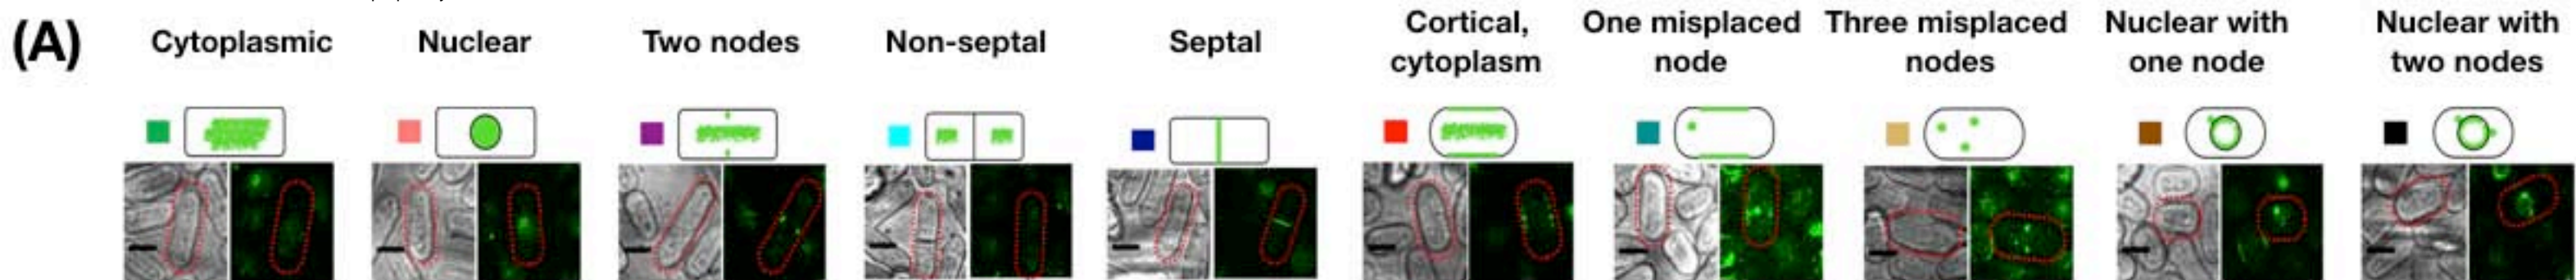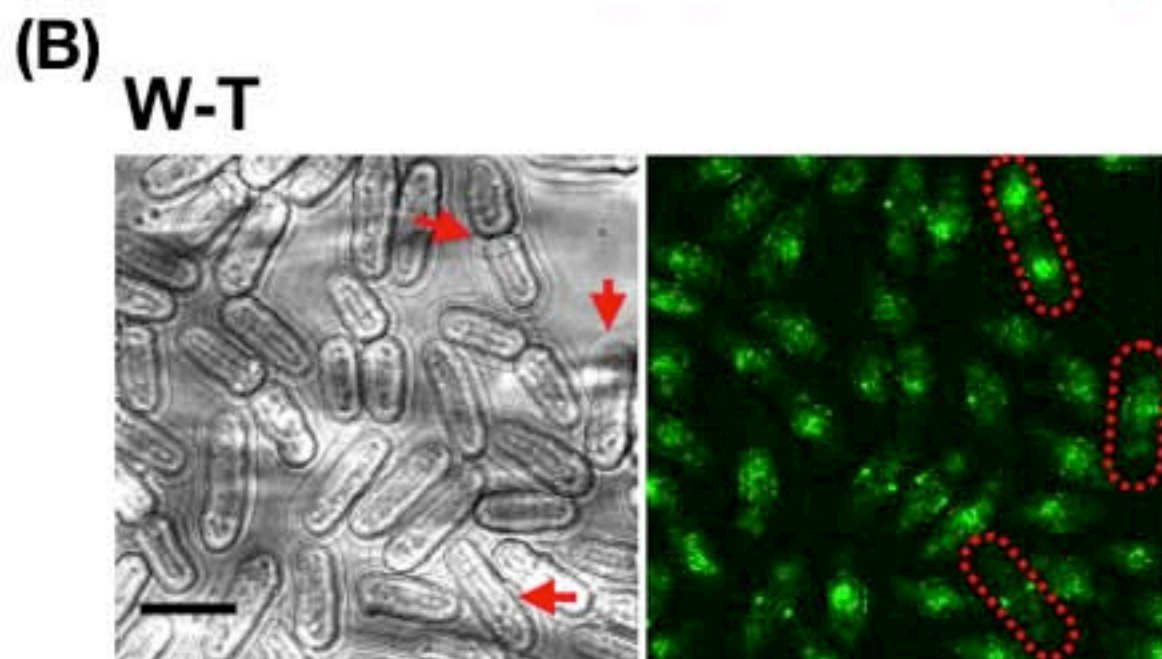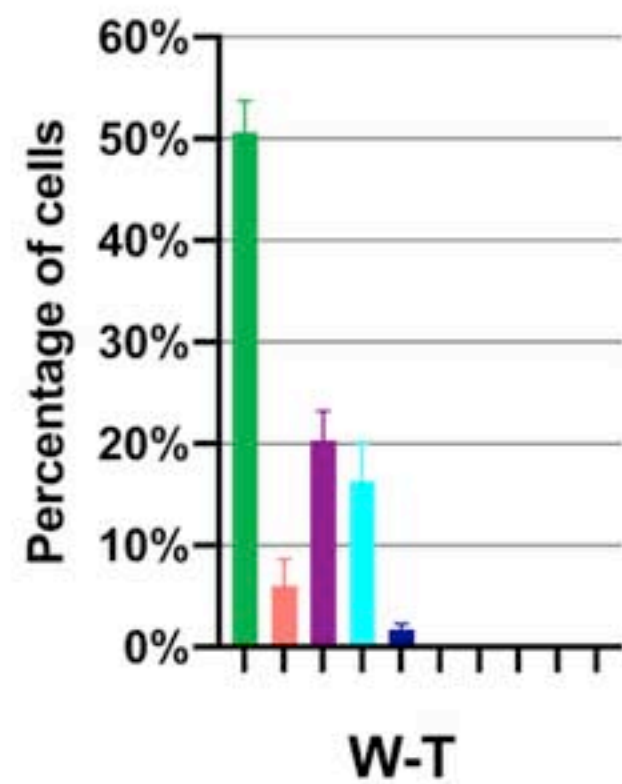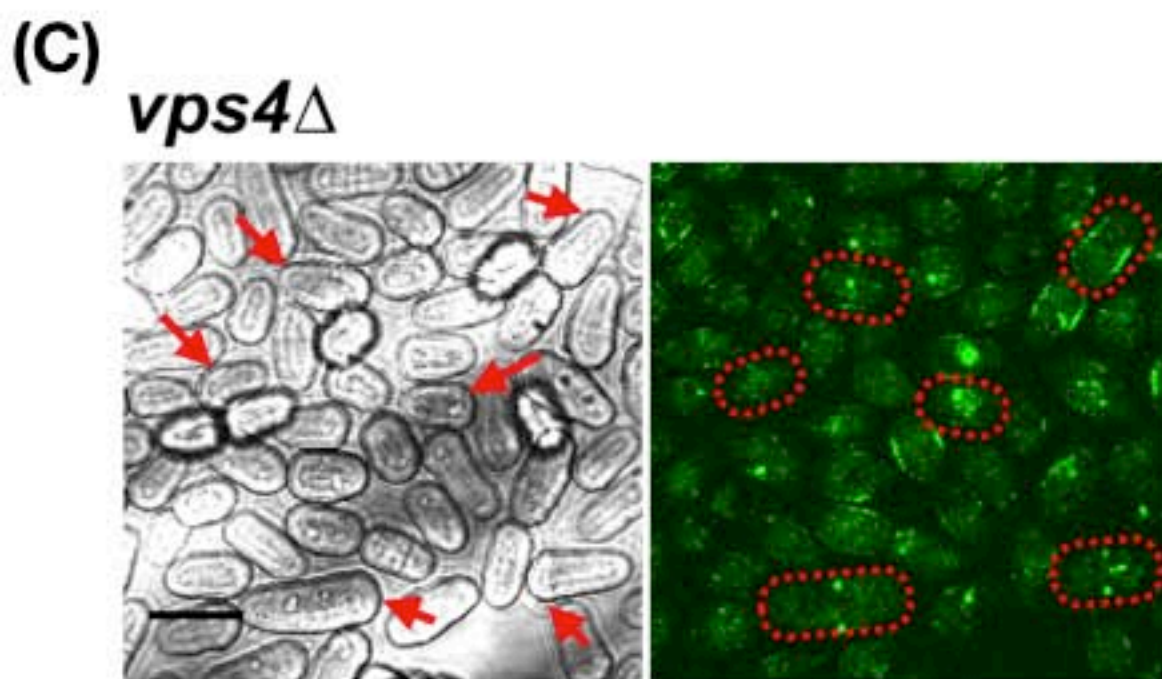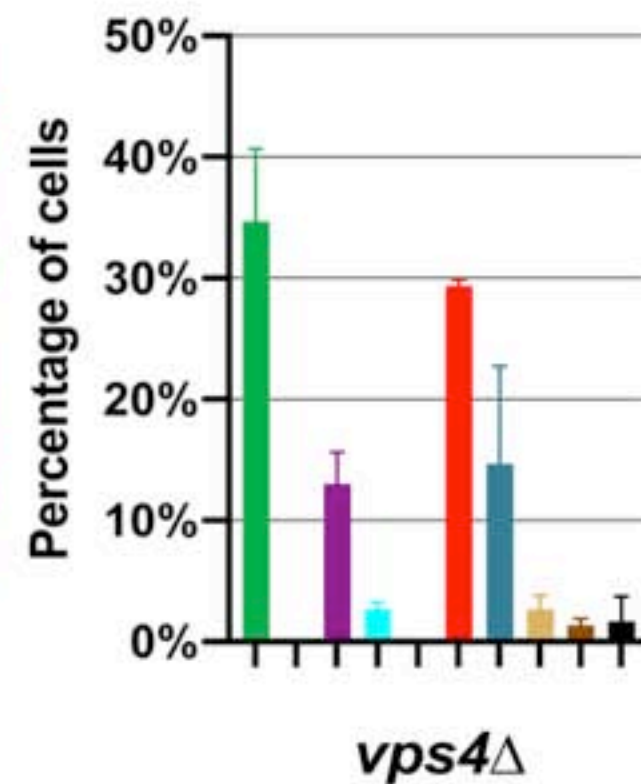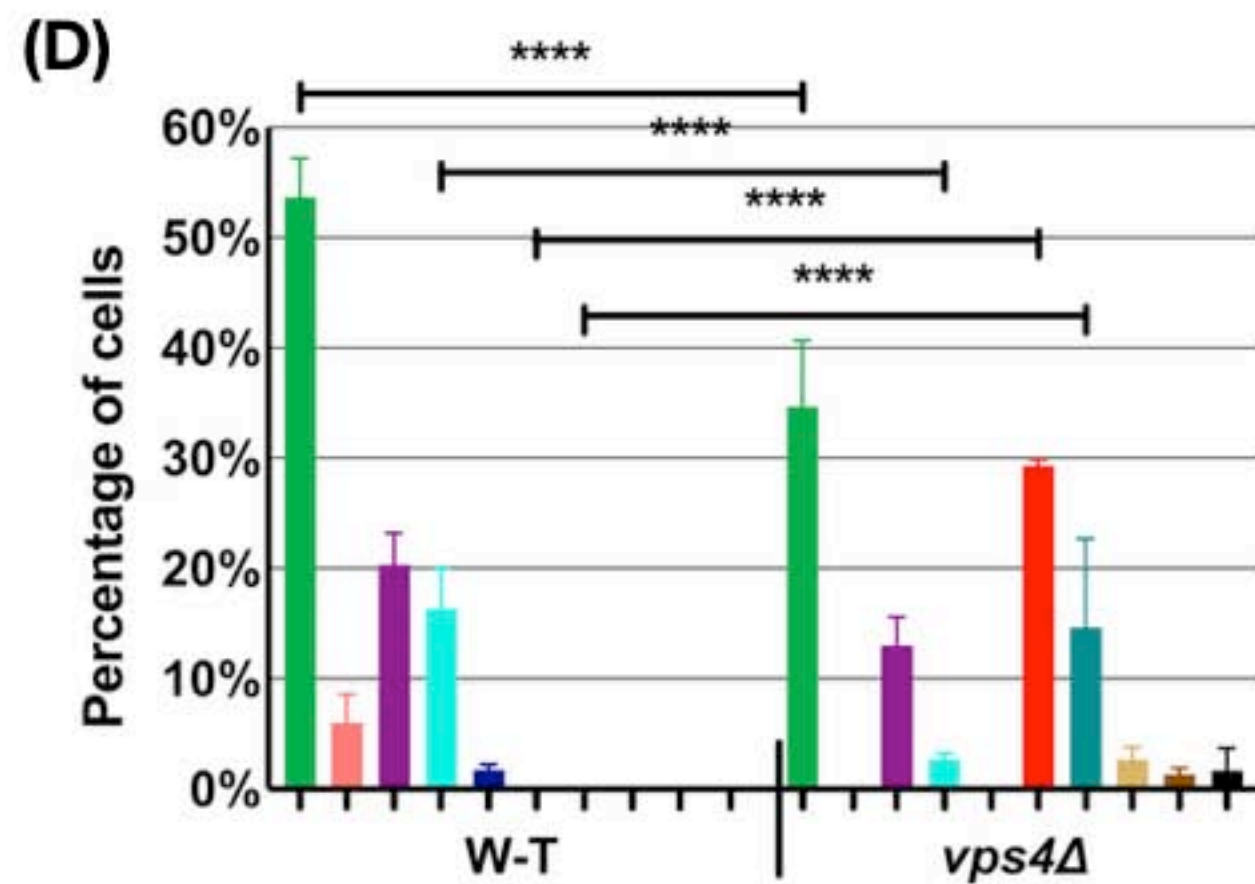

**(A)*****mid1*Δ X *ark1-T11* Tetrads**

bioRxiv preprint doi: <https://doi.org/10.1101/2019.12.13.875211>; this version posted December 13, 2019. The copyright holder for this preprint (which was not certified by peer review) is the author/funder, who has granted bioRxiv a license to display the preprint in perpetuity. It is made available under aCC-BY 4.0 International license.

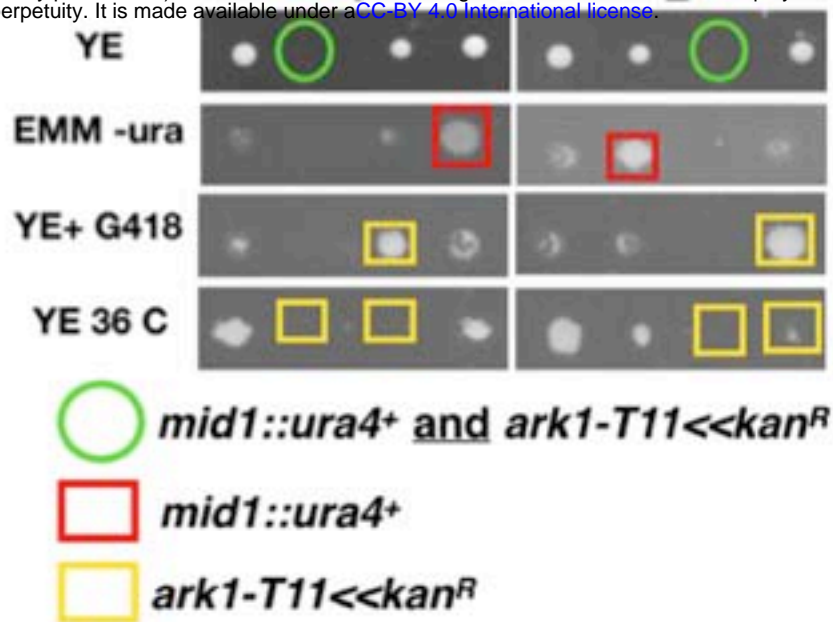**(B)**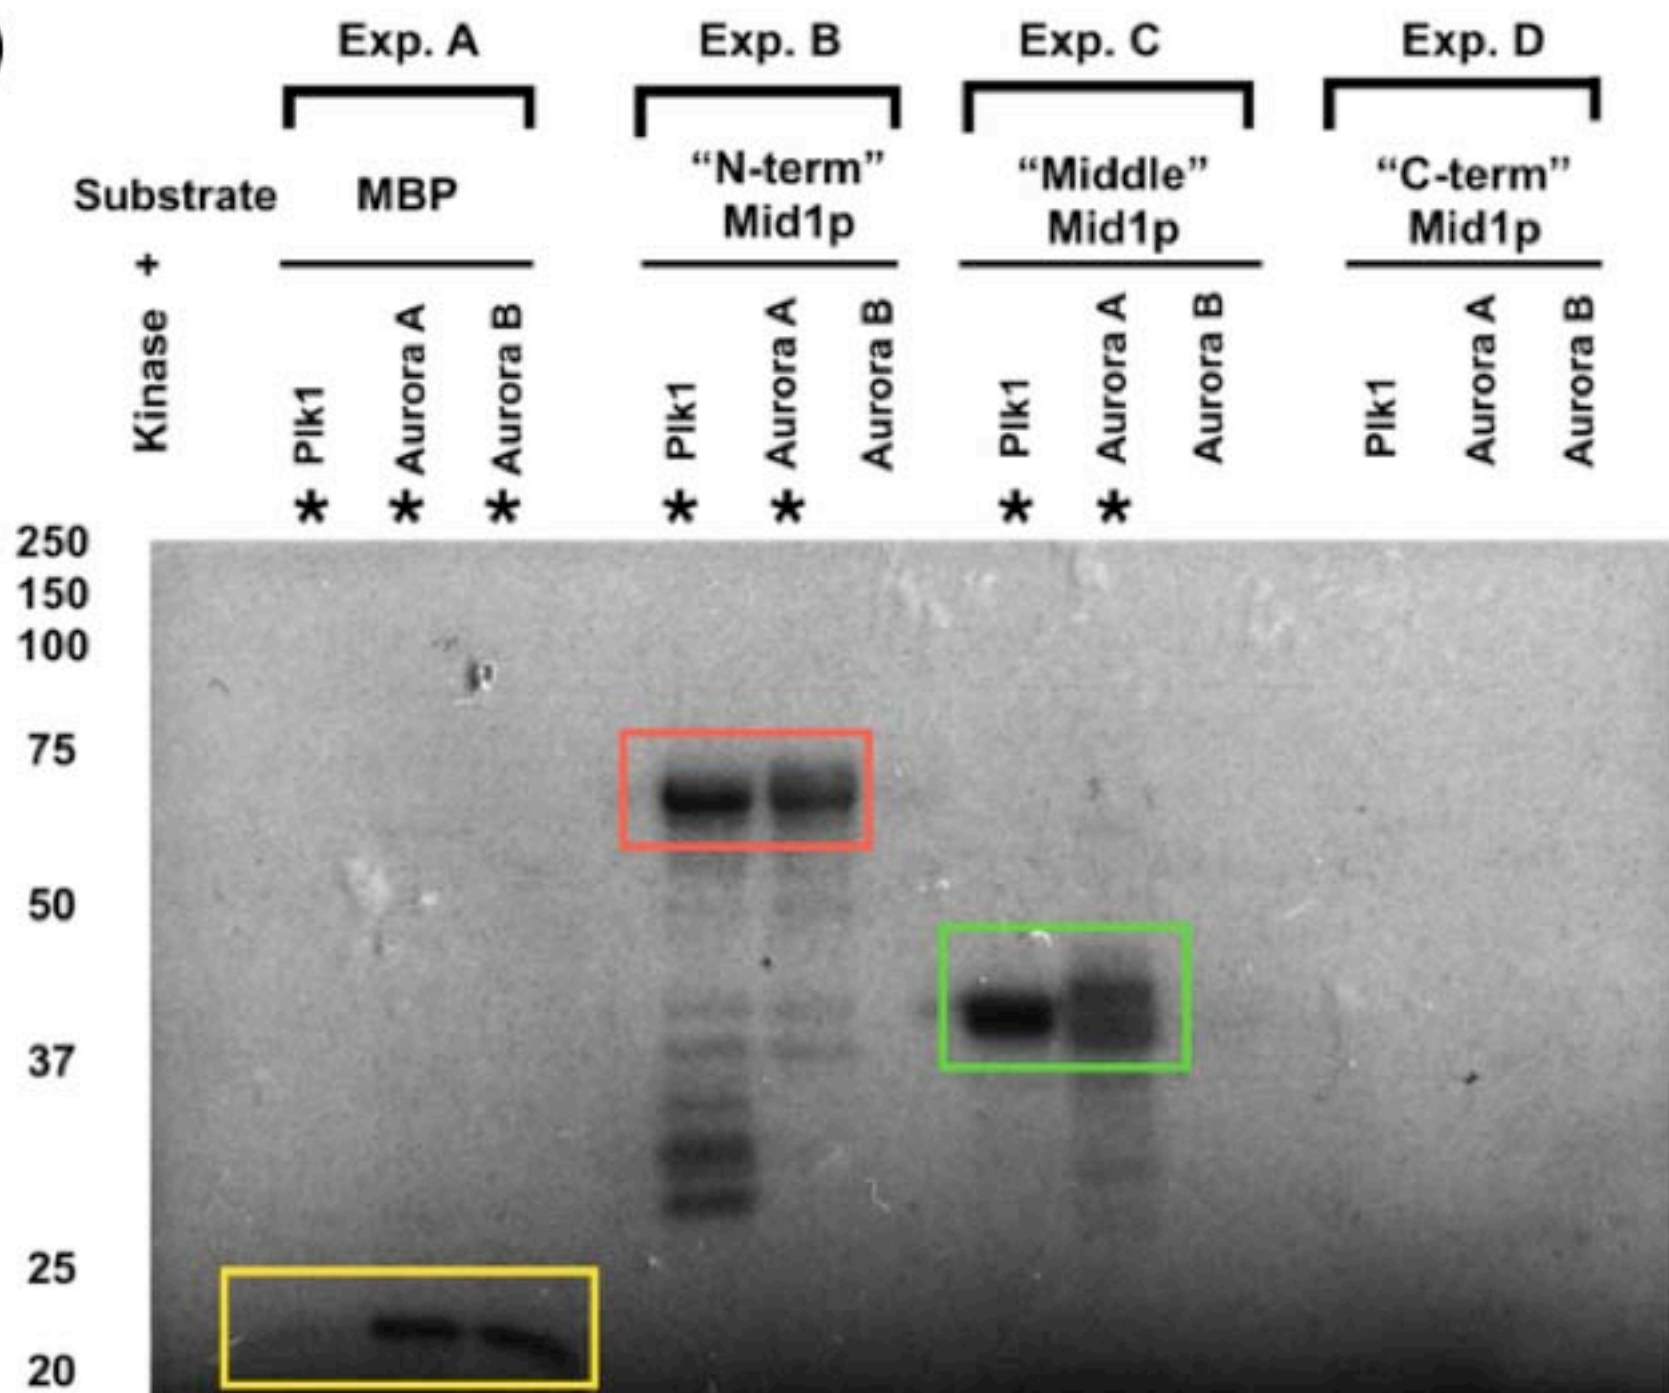



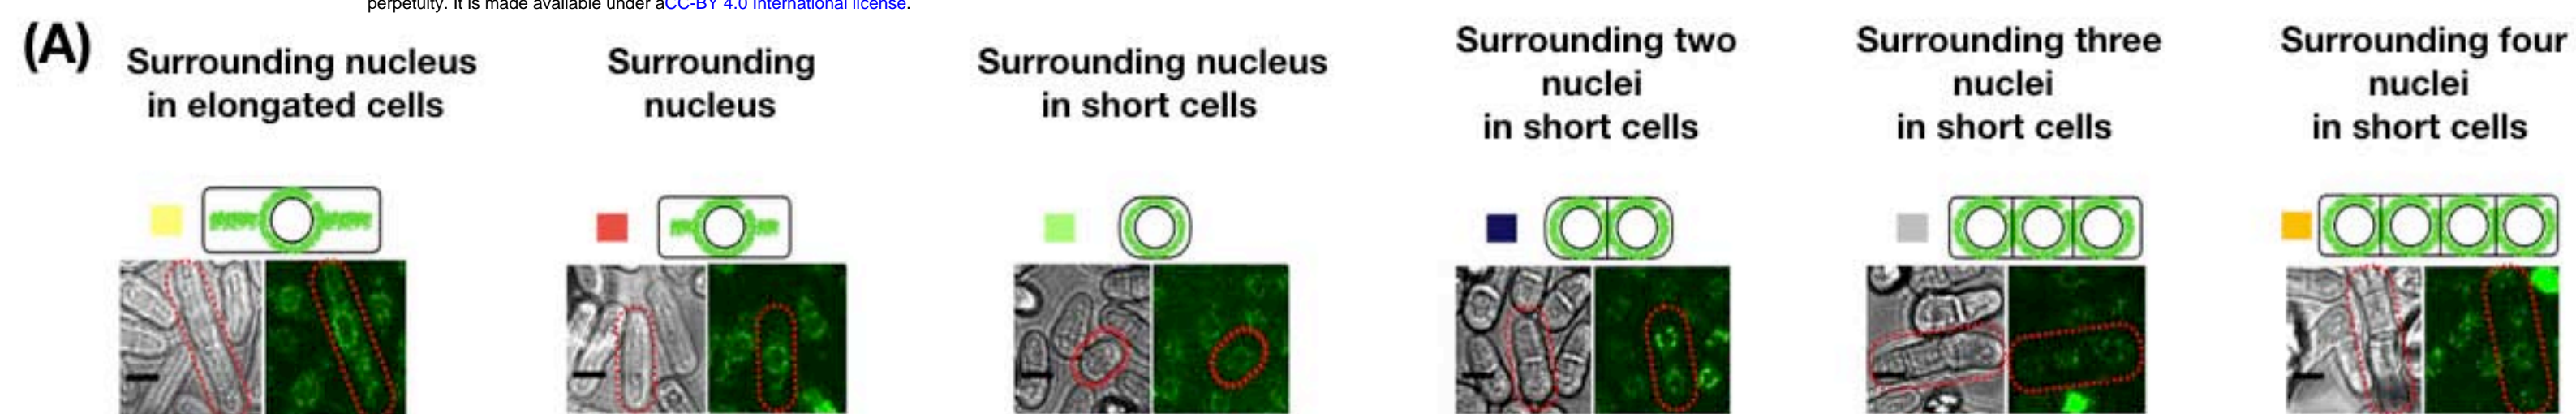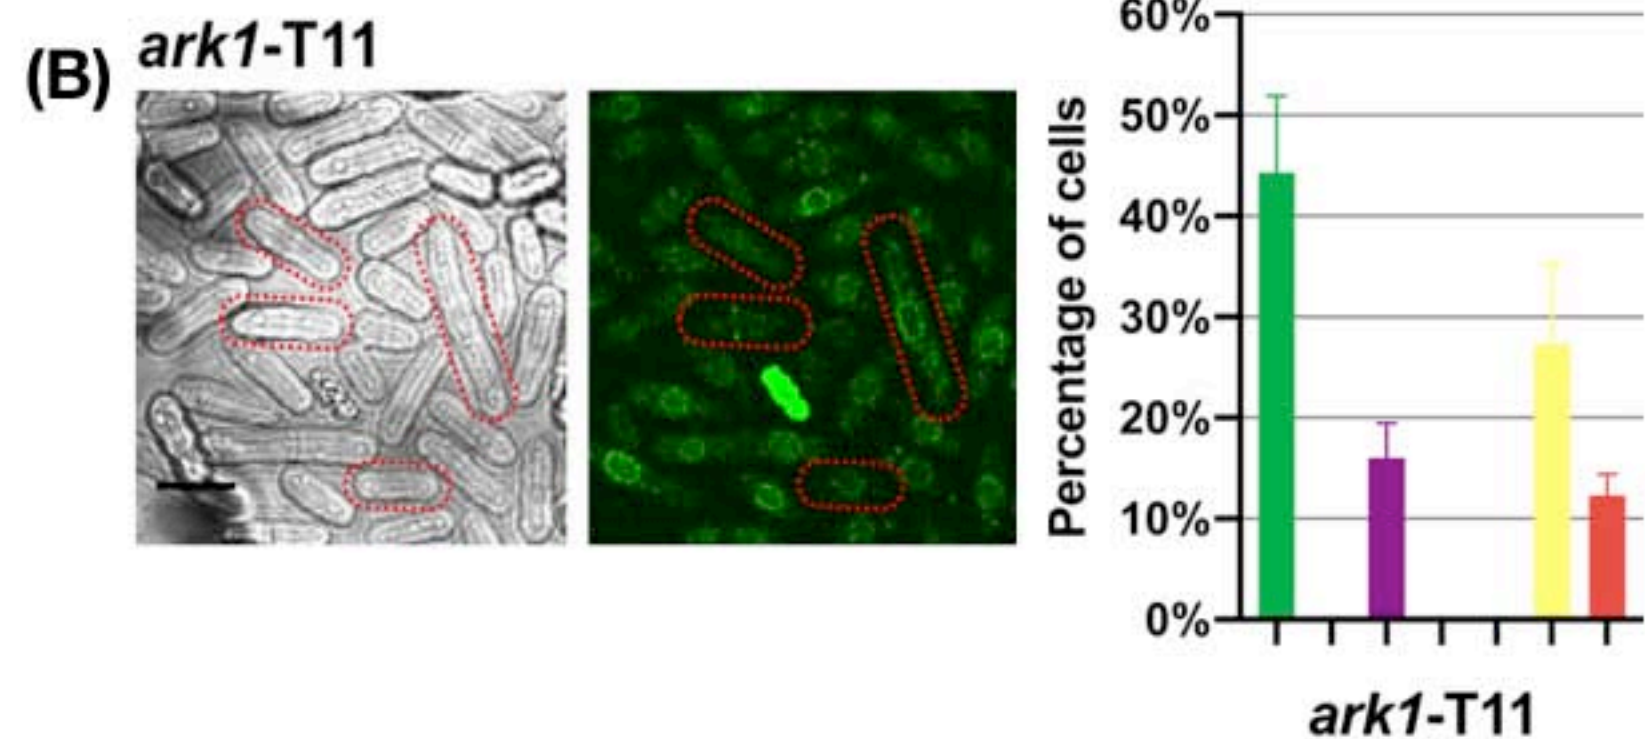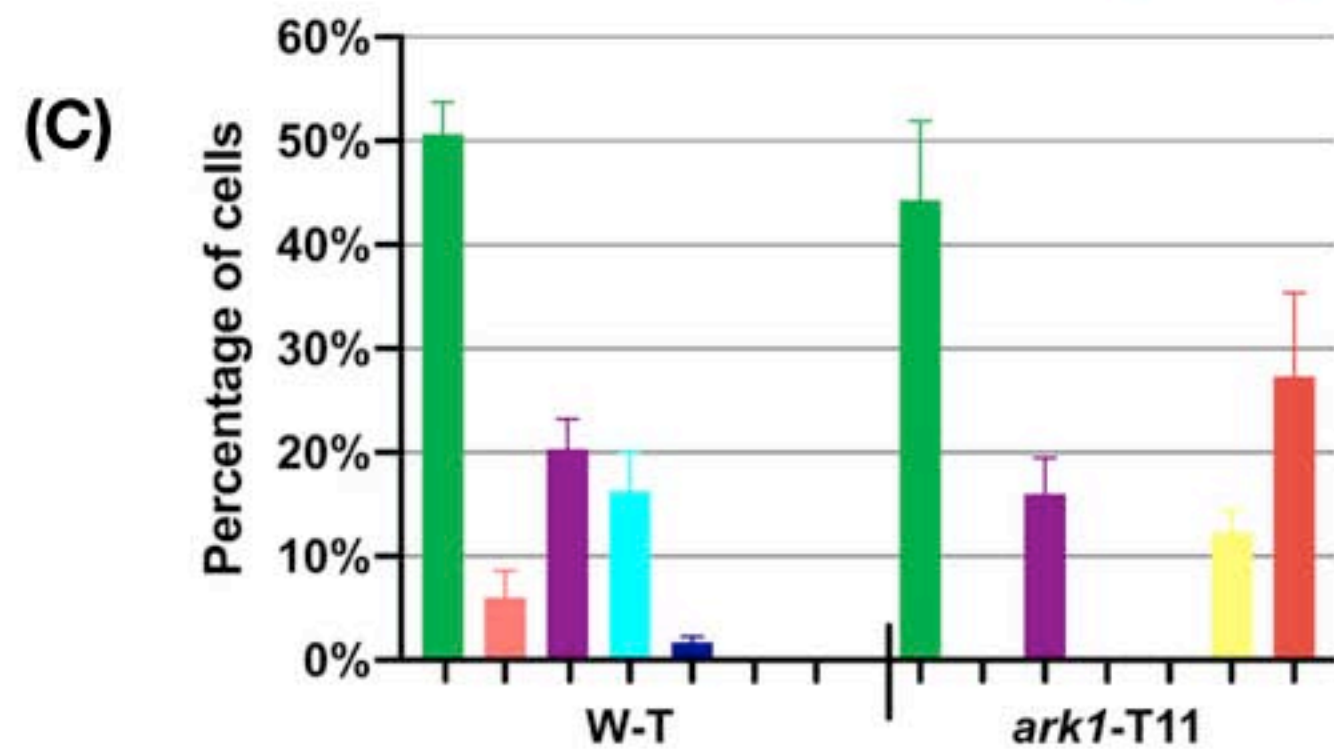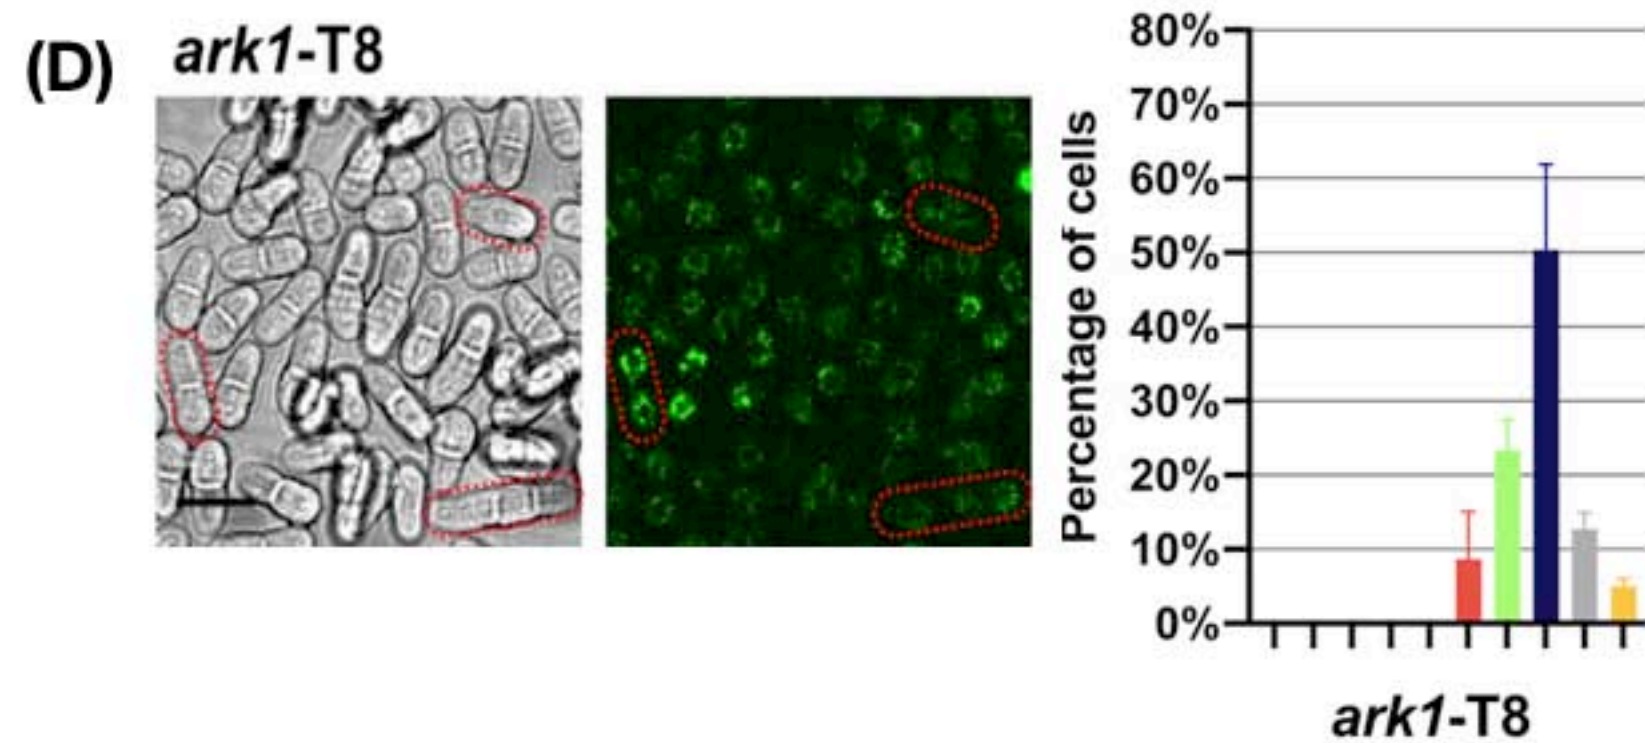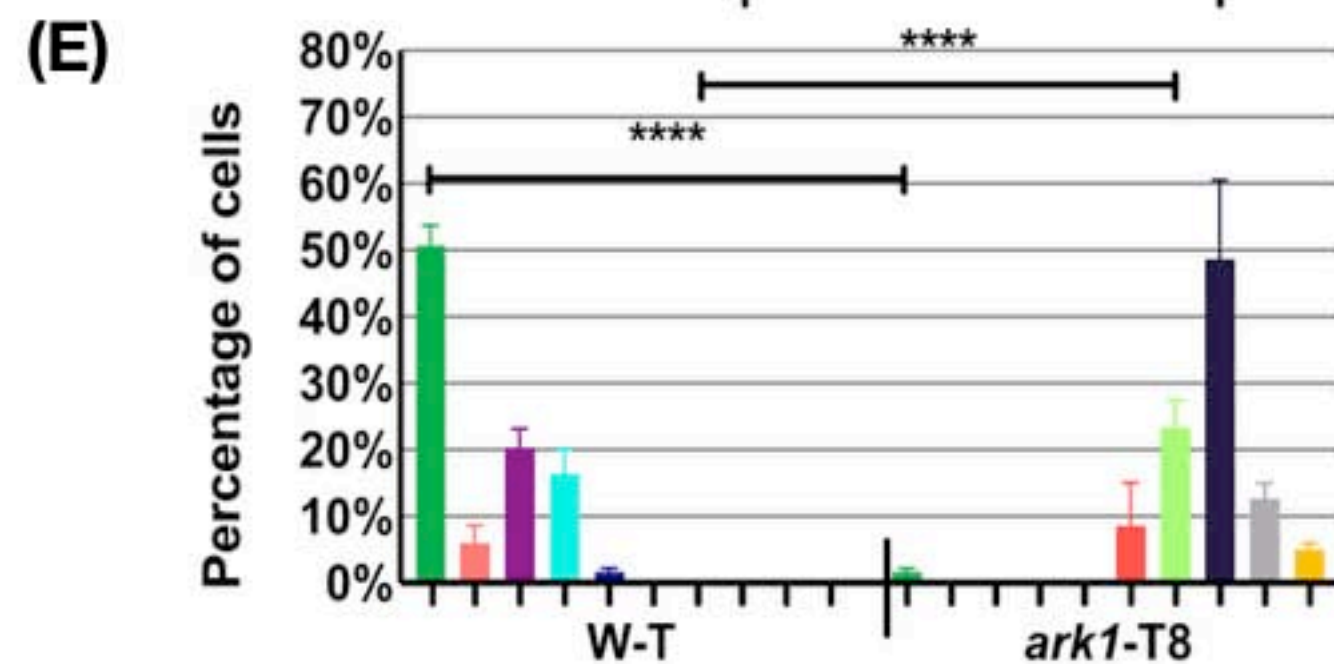



**(A)**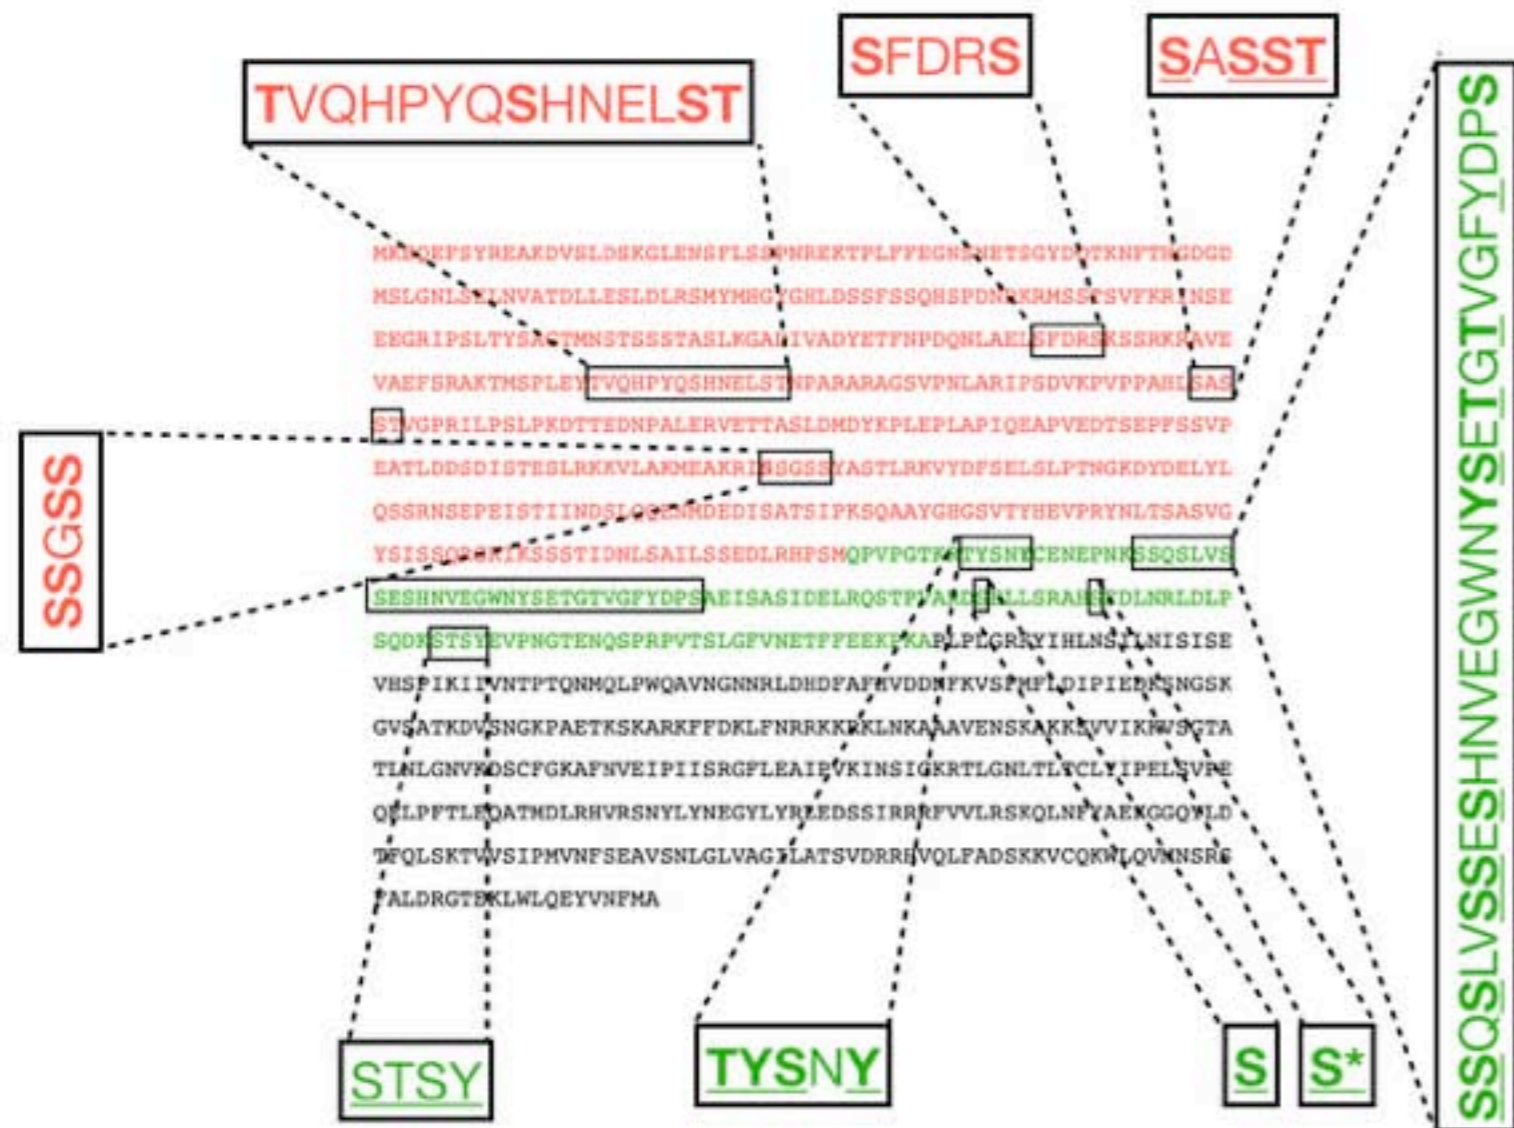**(B)**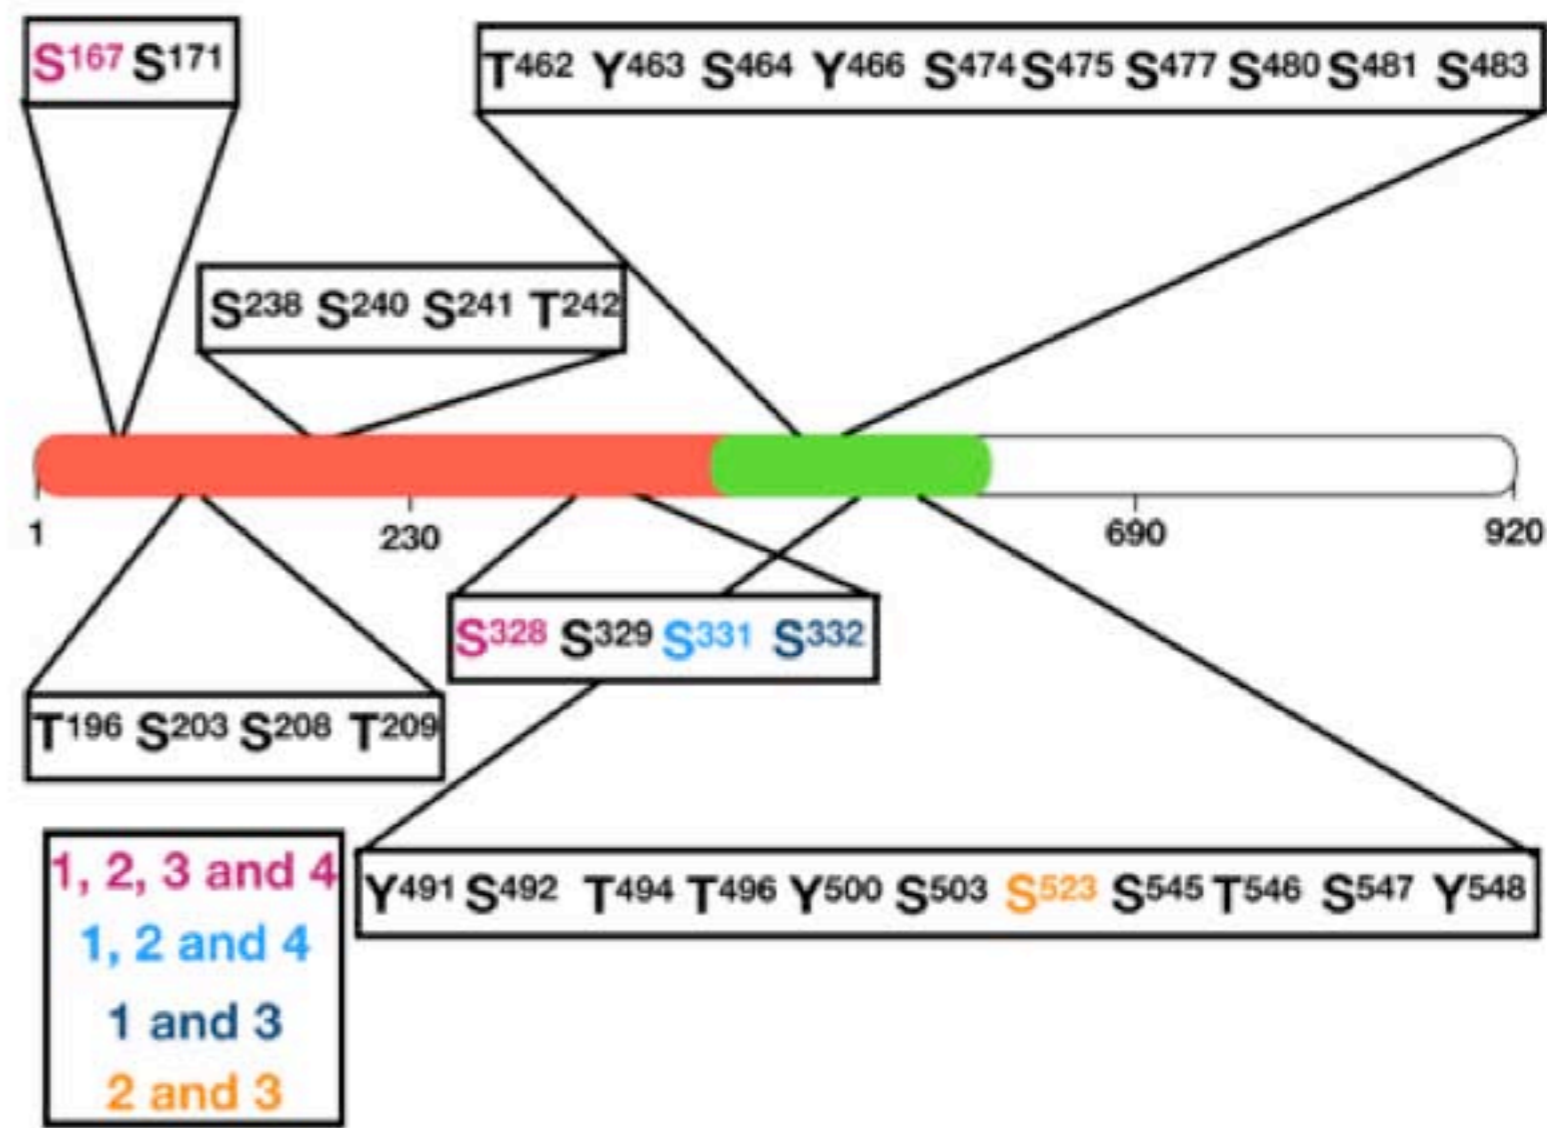

**(A)****Experiment A  
aurora A****Experiment B  
plk1**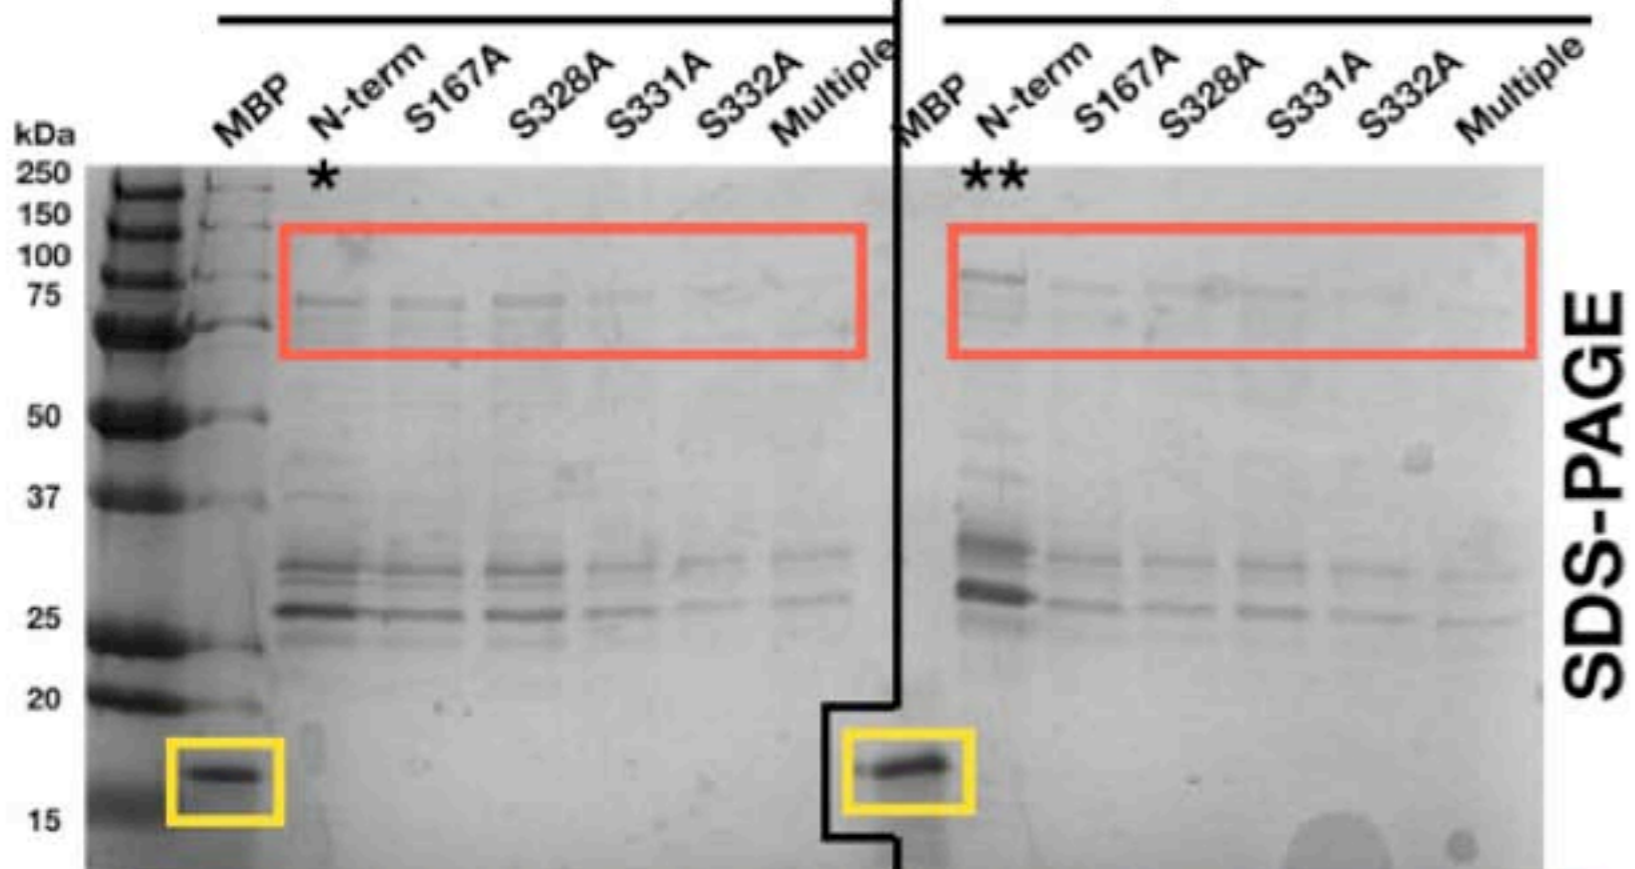**SDS-PAGE****Autoradiograph**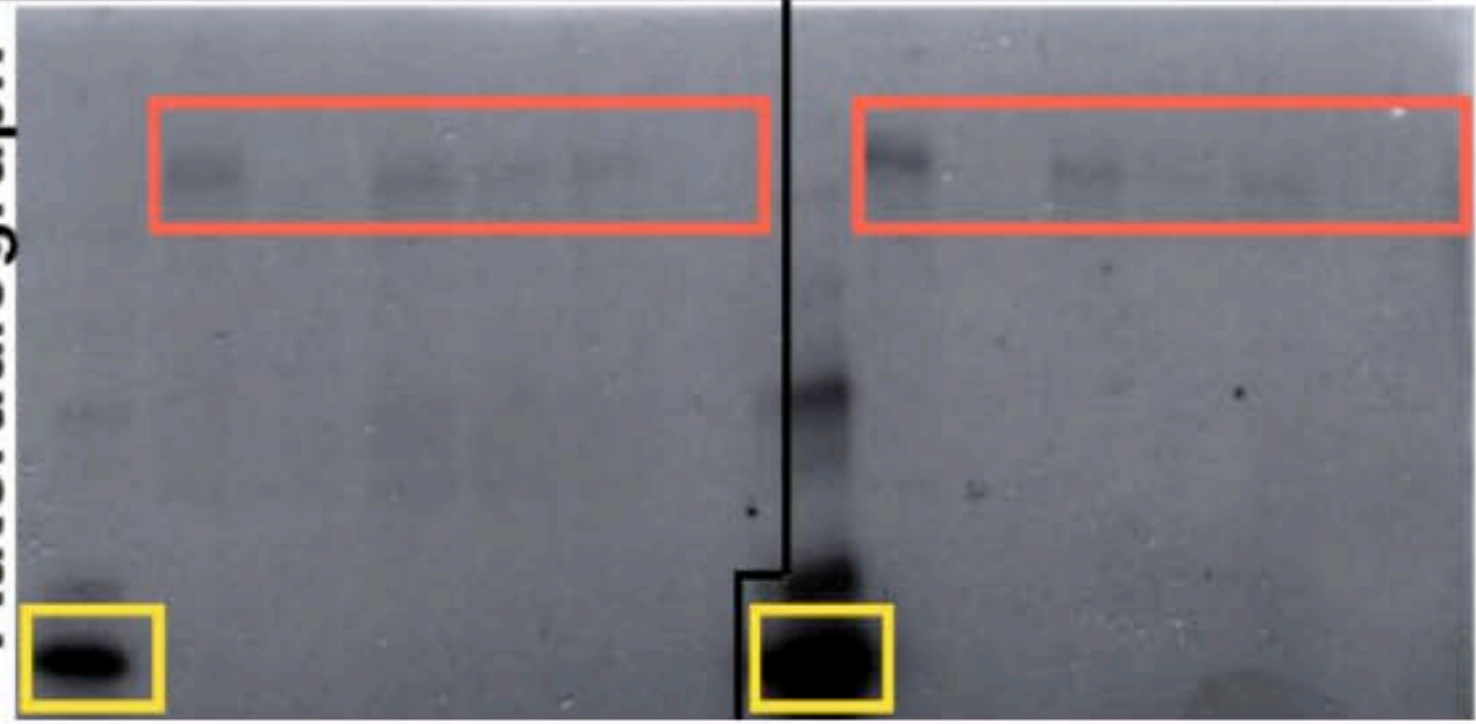**(B)****Experiment A  
aurora A****Experiment B  
plk1**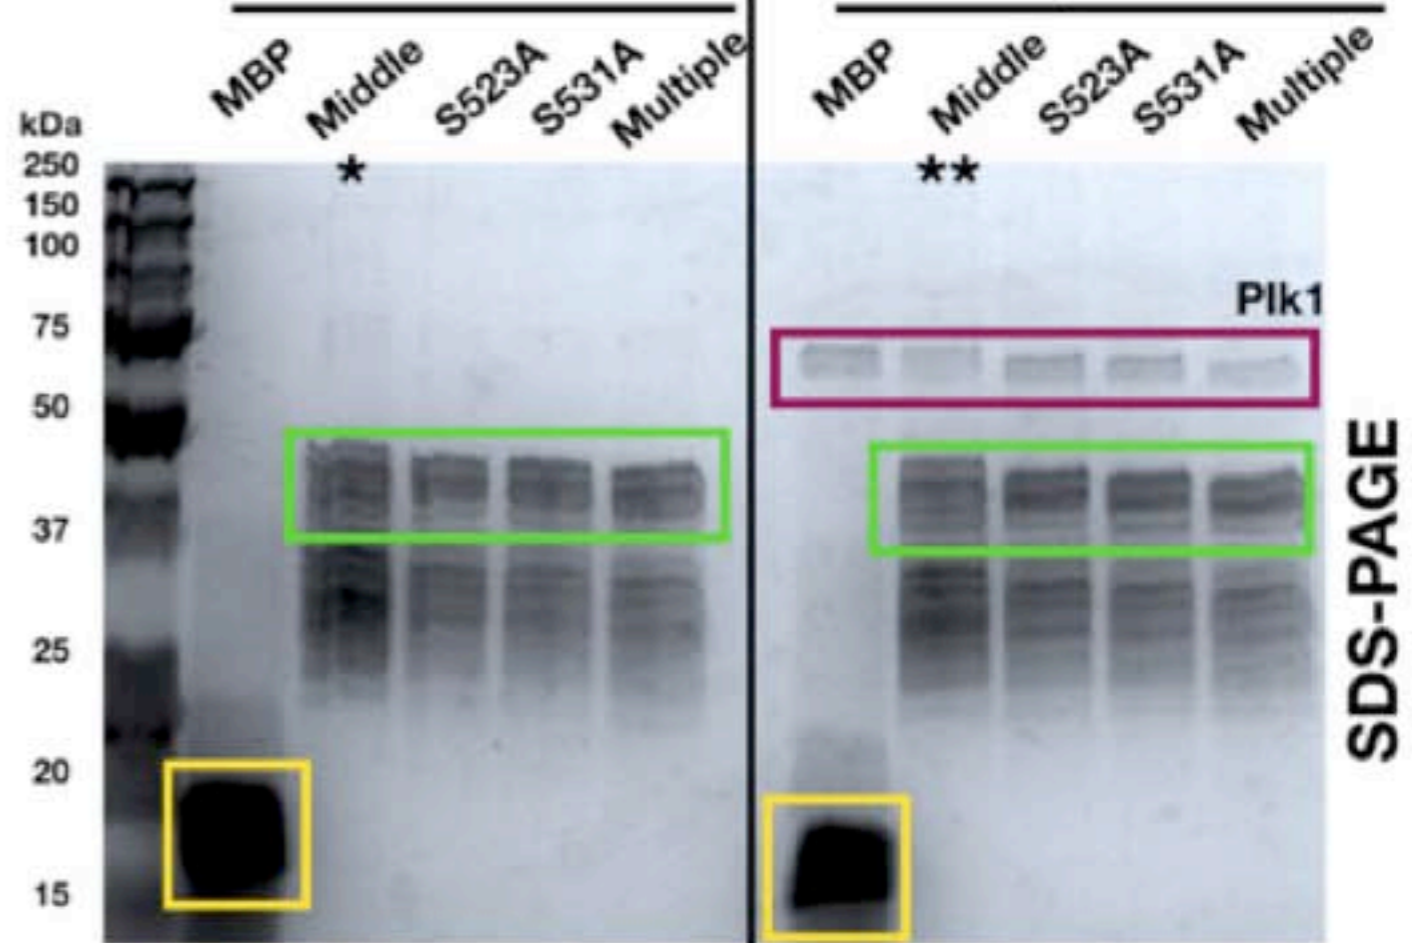**SDS-PAGE****Autoradiograph**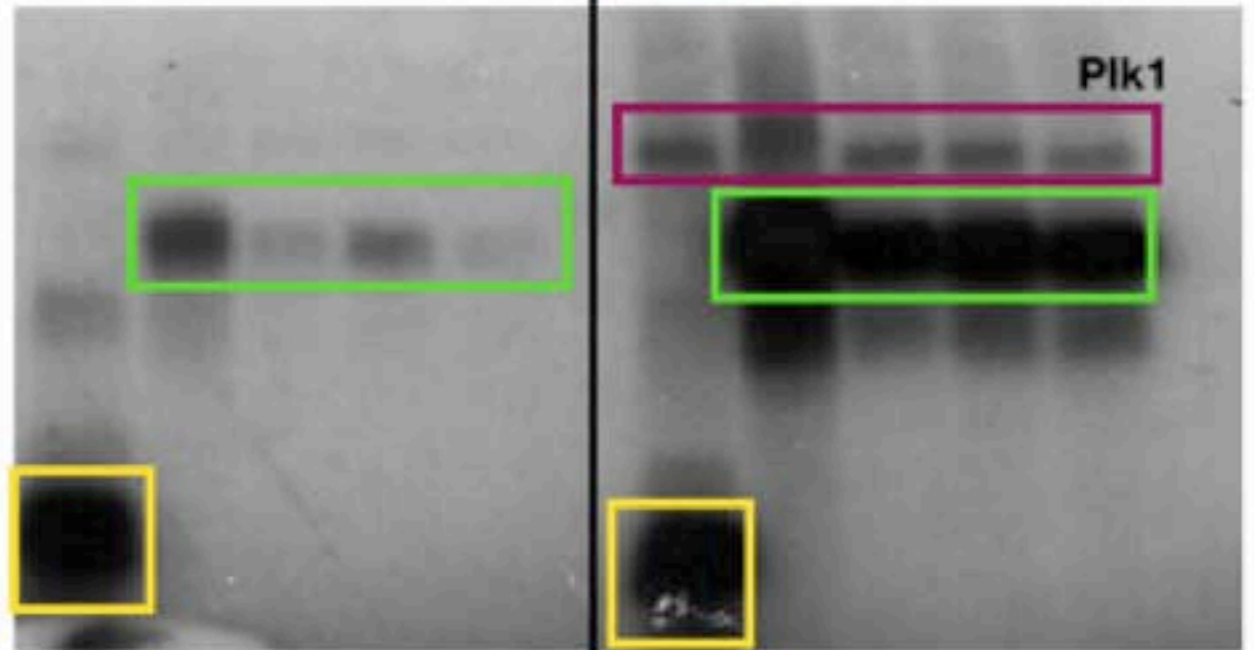



**(A)**

bioRxiv preprint doi: <https://doi.org/10.1101/2019.12.13.875211>; this version posted December 13, 2019. The copyright holder for this preprint (which was not certified by peer review) is the author/funder, who has granted bioRxiv a license to display the preprint in perpetuity. It is made available under aCC-BY 4.0 International license.

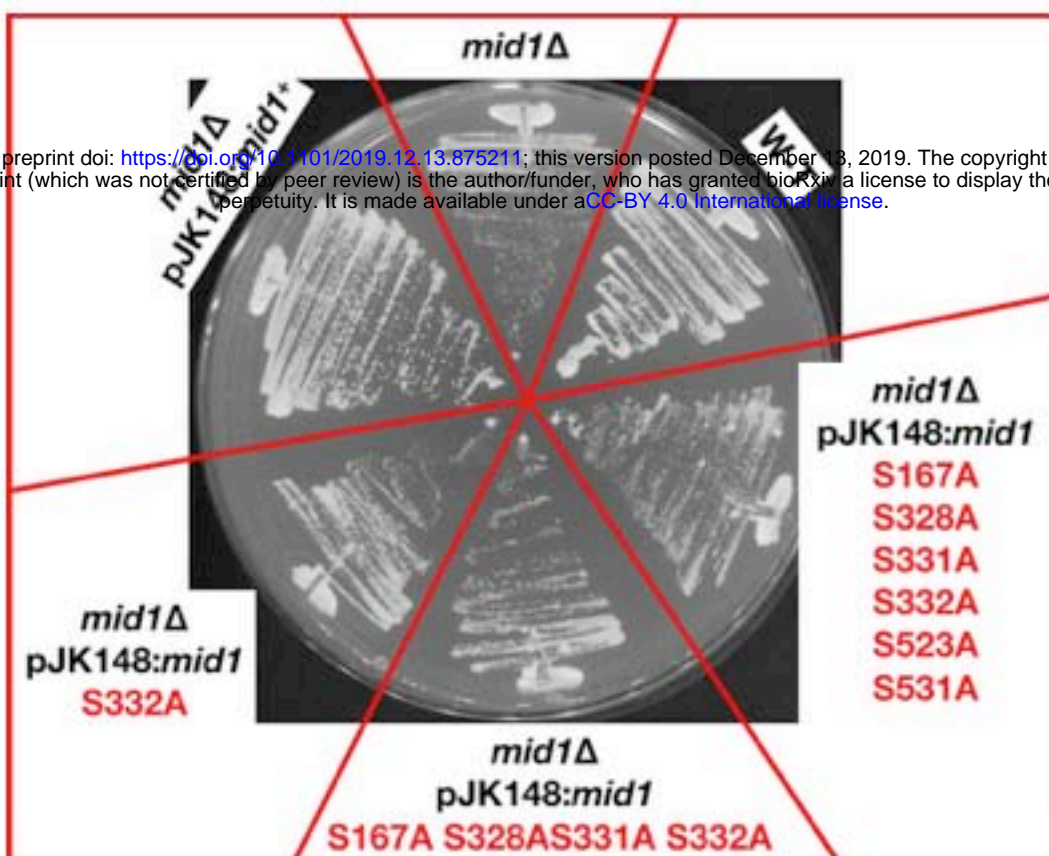**(B)***mid1Δ*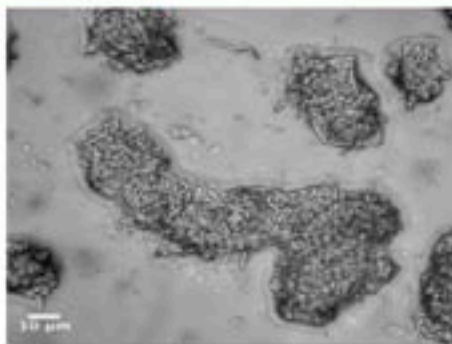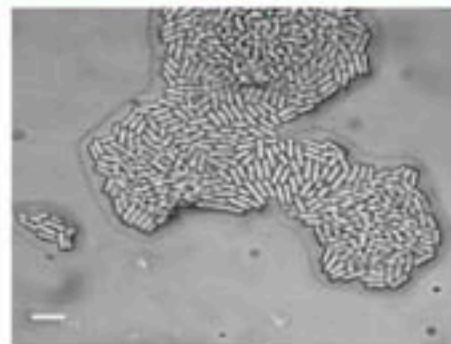*mid1Δ*  
pJK148:*mid1*<sup>+</sup>*mid1Δ*  
pJK148:*mid1*  
S332A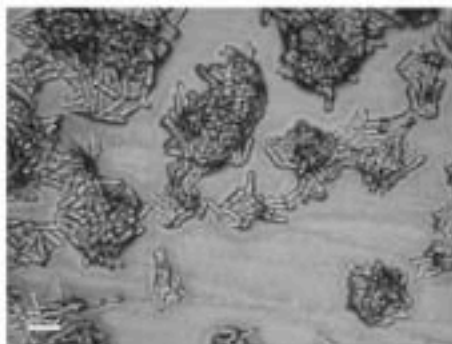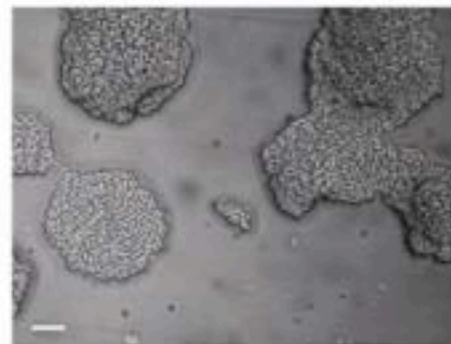*mid1Δ*  
pJK148:*mid1*  
S332D*mid1Δ*  
pJK148:*mid1*  
S167A  
S328A S331A  
S332A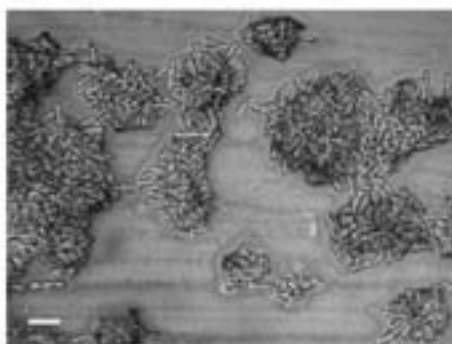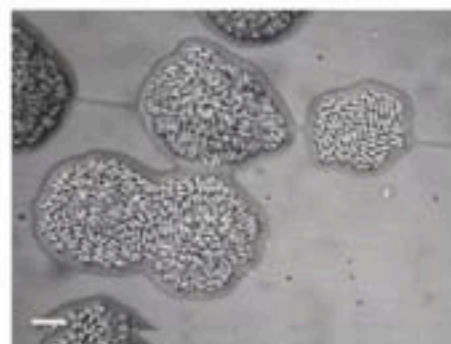*mid1Δ*  
pJK148:*mid1*  
S167D  
S328D S331D  
S332D*mid1Δ*  
pJK148:*mid1*  
S167A  
S328A S331A  
S332A S523A  
S531A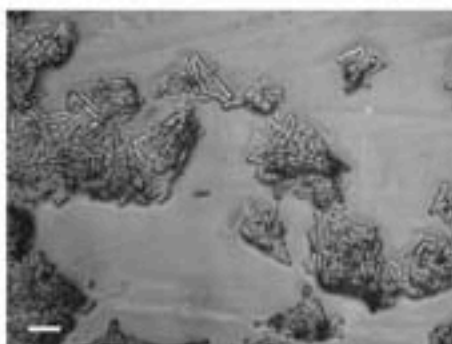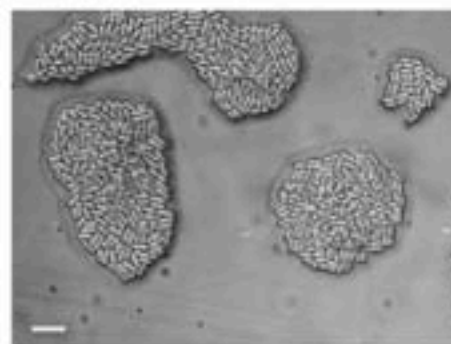*mid1Δ*  
pJK148:*mid1*  
S167D  
S328D S331D  
S332D S523D  
S531D*mid1Δ* phenotype

W-T phenotype



**W-T**

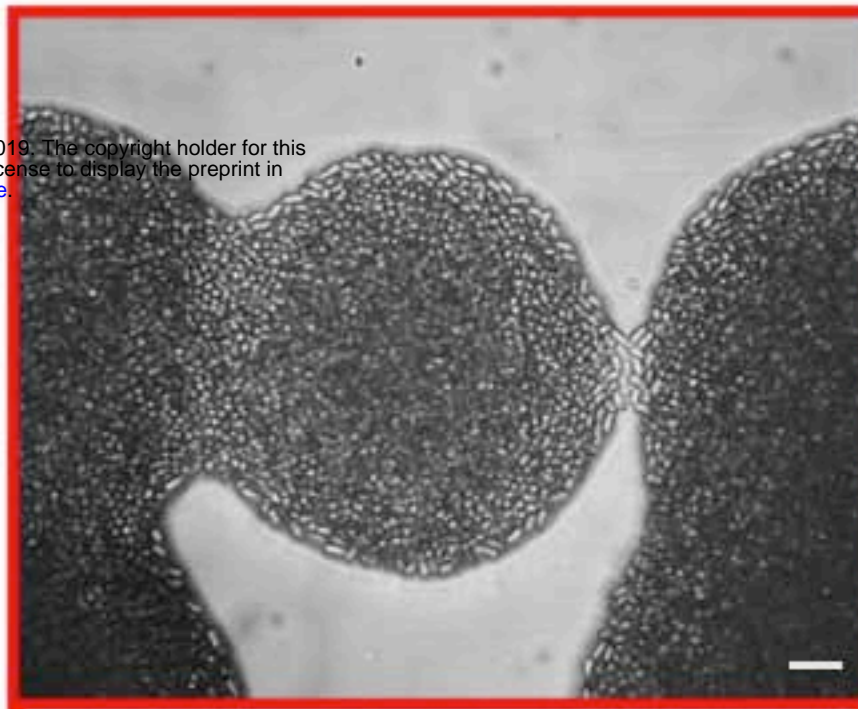

***mid1*Δ**  
**pJK148:*mid1*S523D S531D**

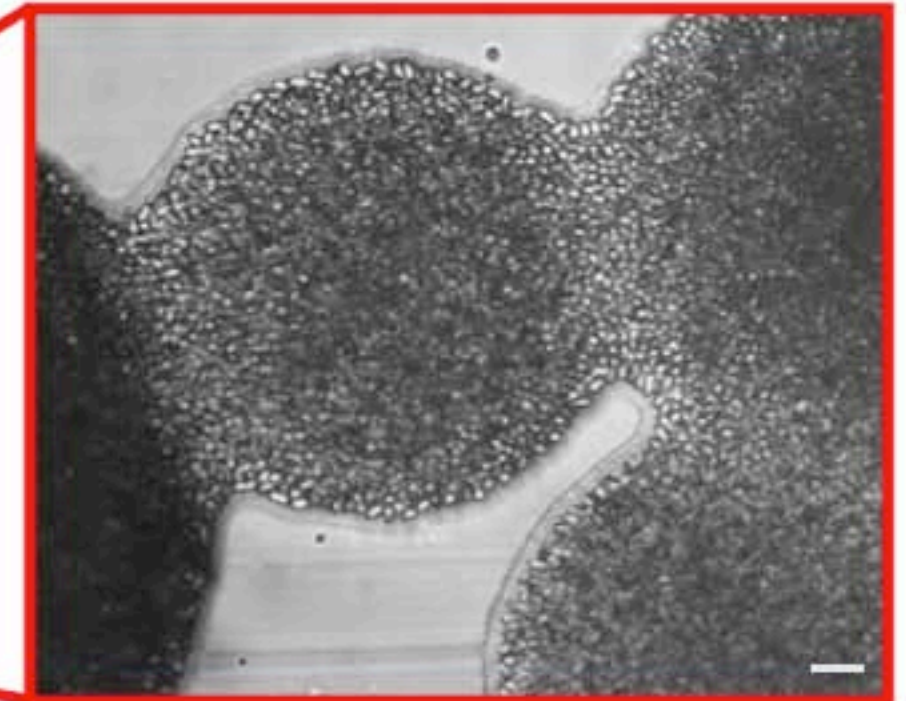

***vps4*Δ**

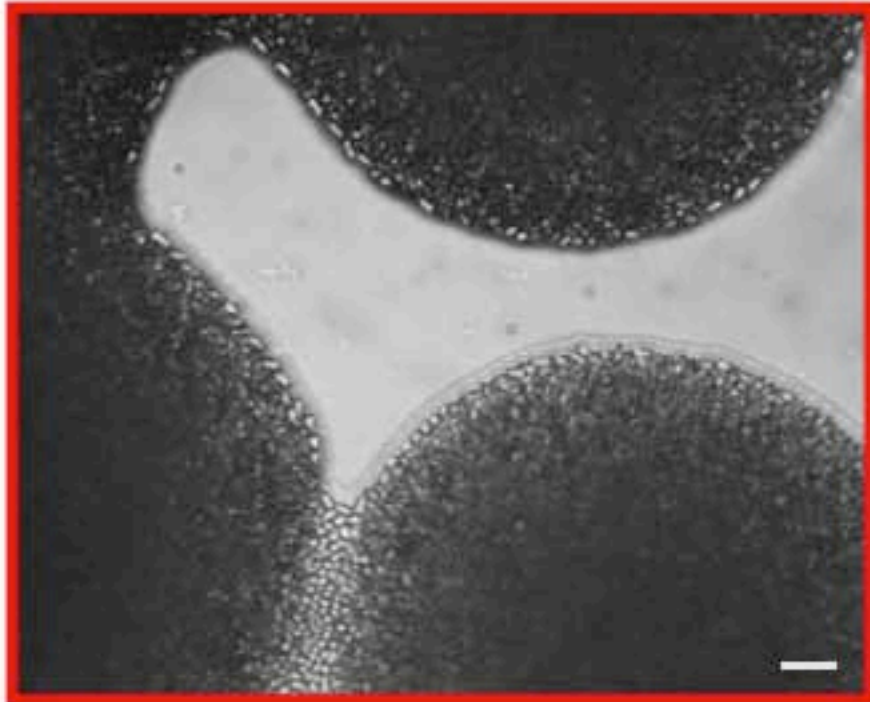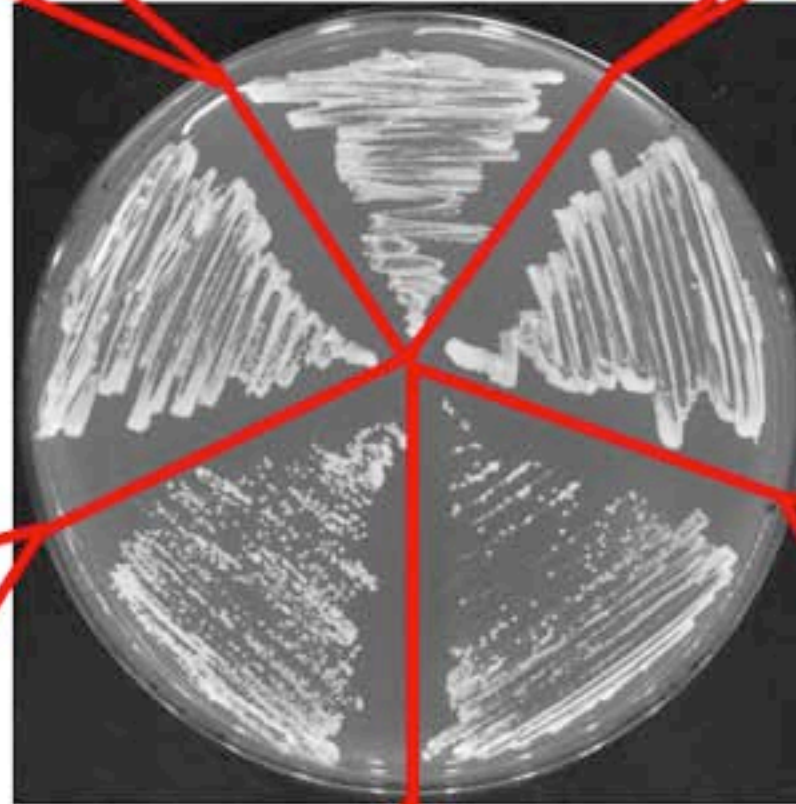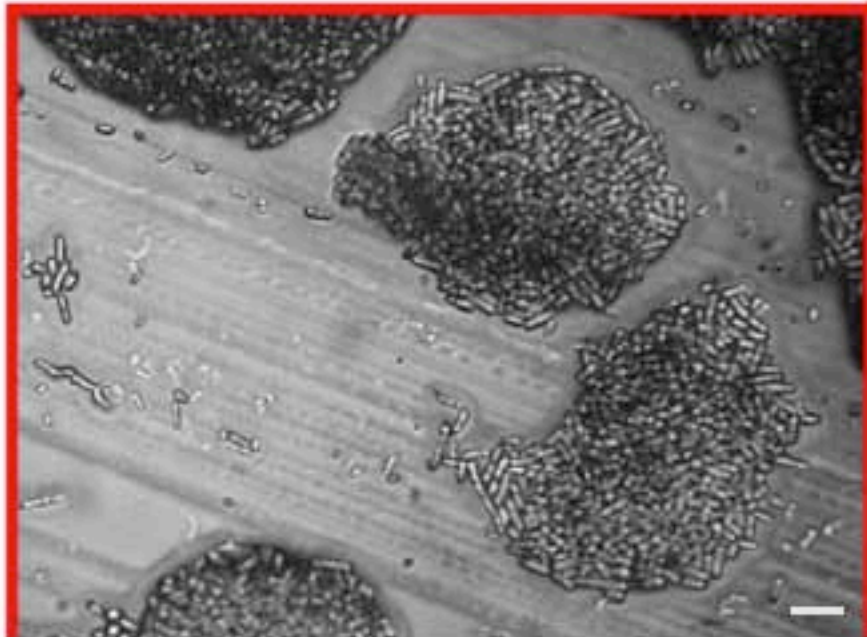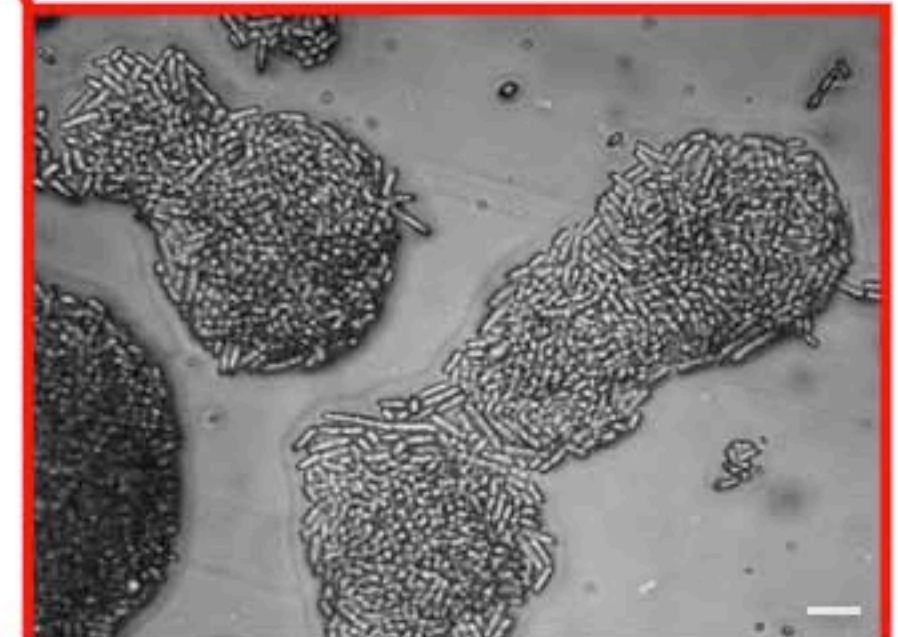

***mid1*Δ**

**pJK148:*mid1*S523D S531D *vps4*Δ**

***mid1*Δ**

**pJK148:*mid1*S523D S531D *vps4*Δ**



**A**

bioRxiv preprint doi: <https://doi.org/10.1101/2019.12.13.875211>; this version posted December 13, 2019. The copyright holder for this preprint (which was not certified by peer review) is the author/funder, who has granted bioRxiv a license to display the preprint in perpetuity. It is made available under aCC-BY 4.0 International license.

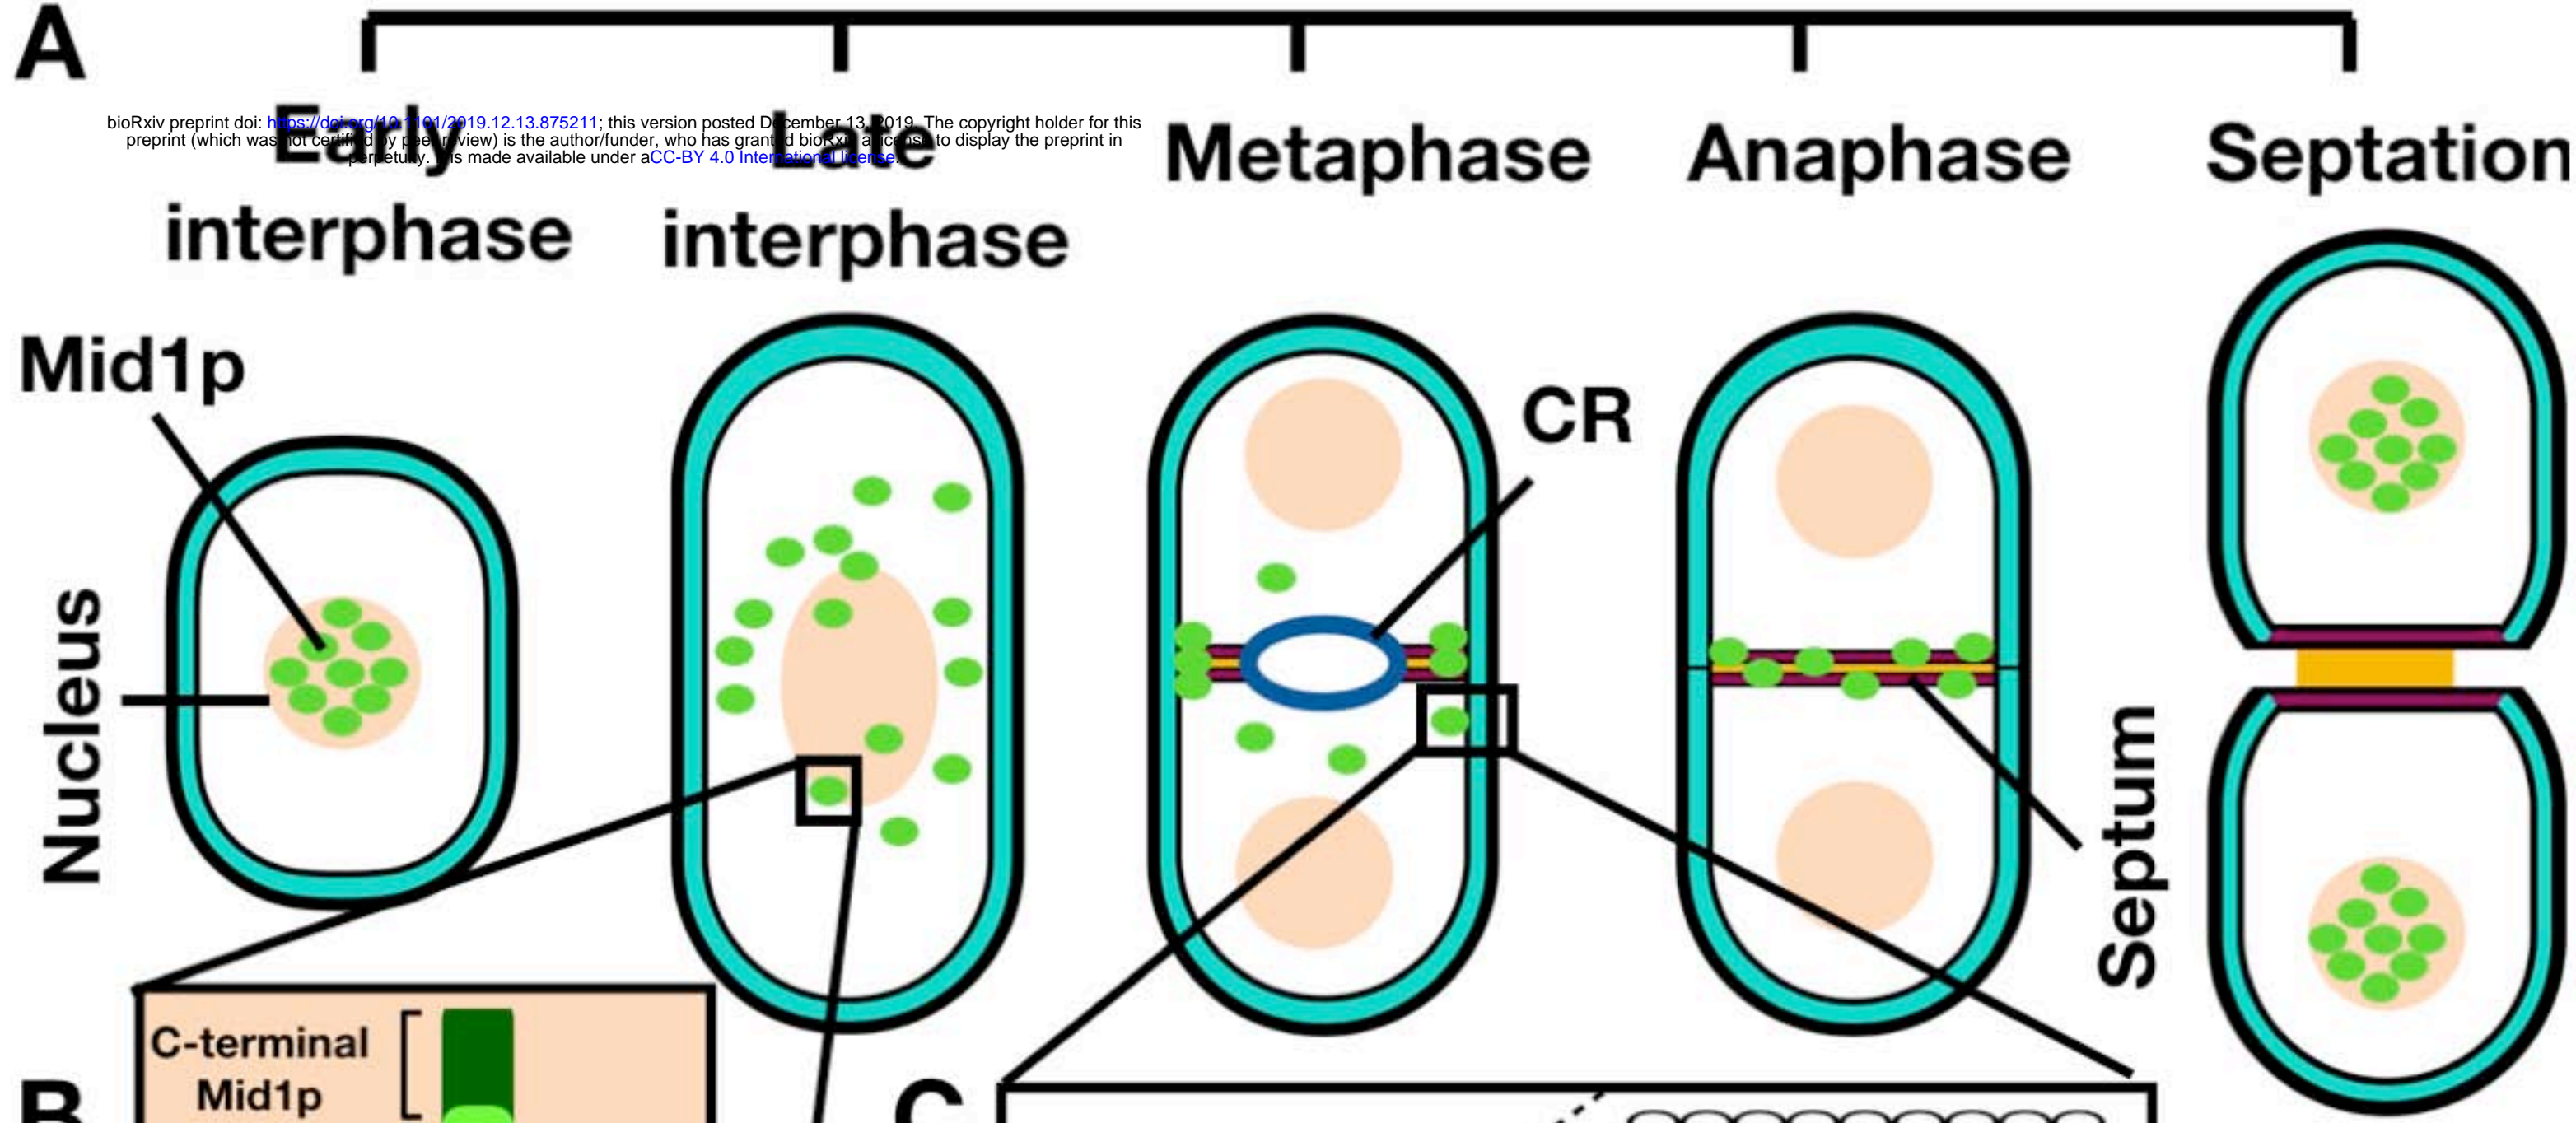**B**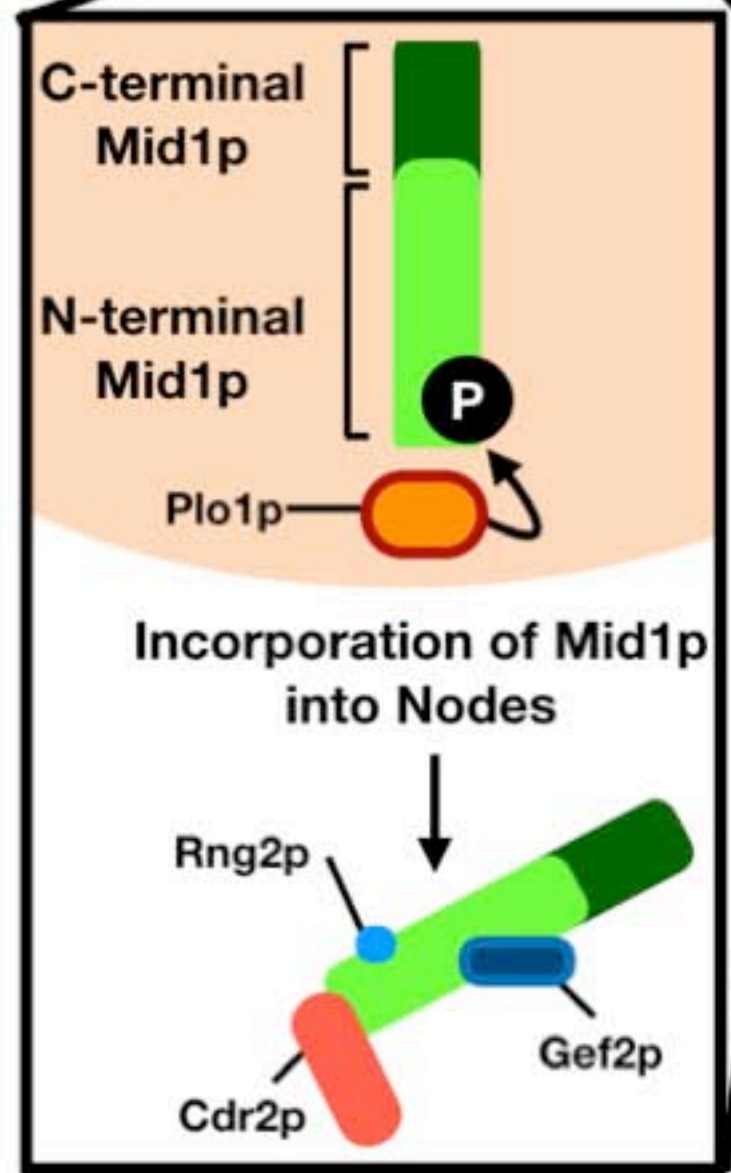**C**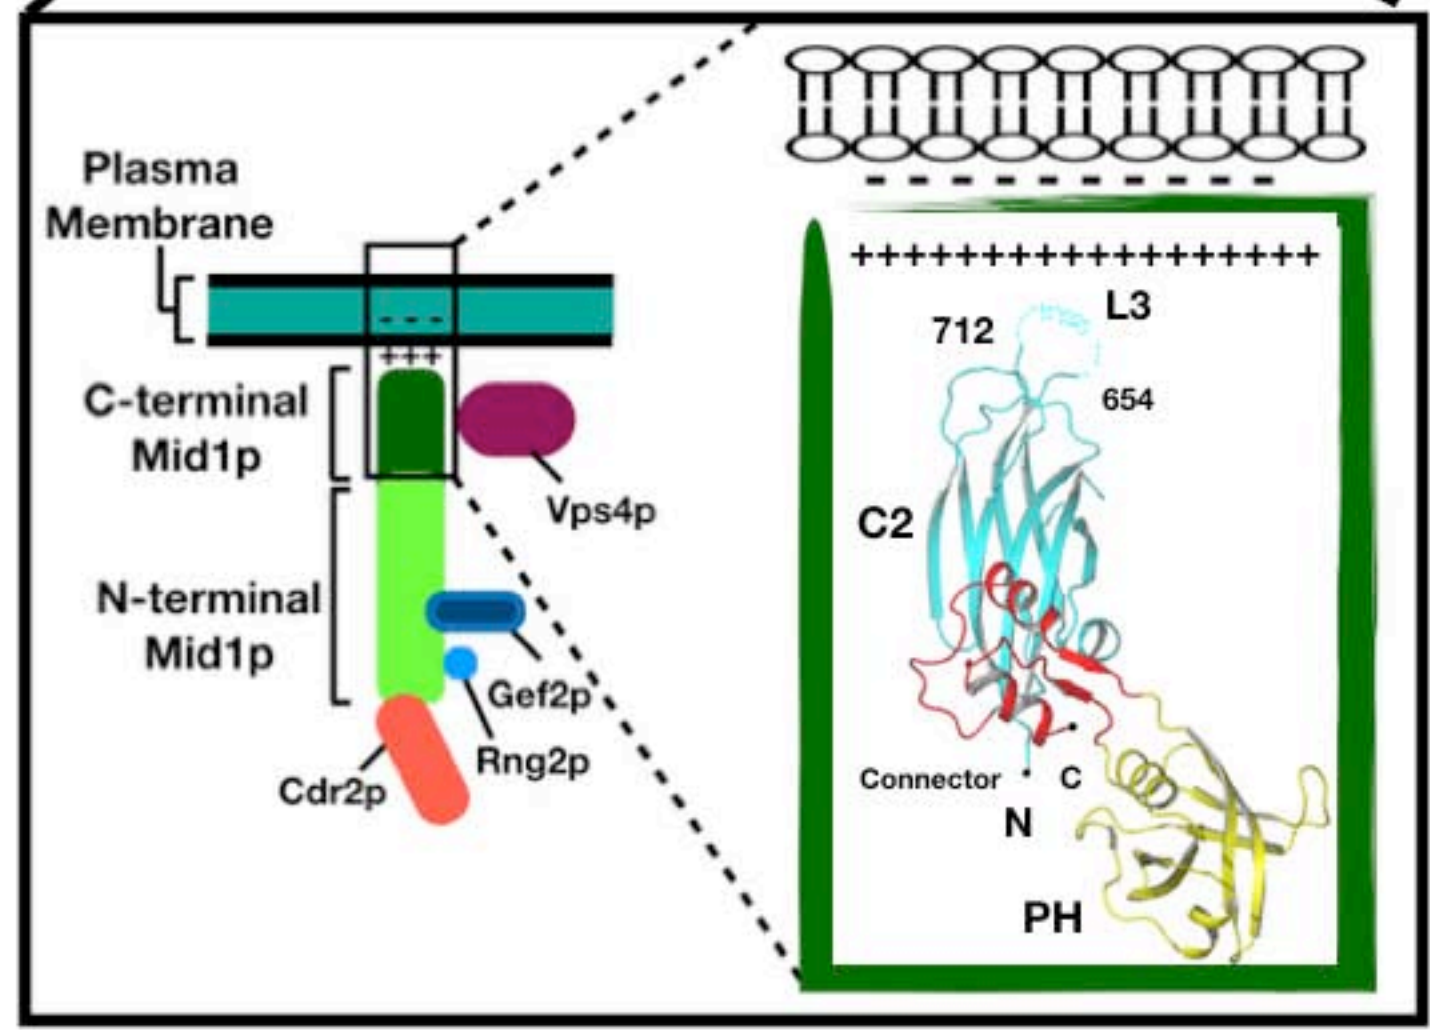

- 1 **S1 Table. *S. pombe* strains used in this study. "GG" number refers to the**  
 2 **laboratory reference collection. All strains *ade*<sup>-</sup>, unless indicated.**

| GG No. | Genotype                                                                                                                                                              | Annotation                                     |
|--------|-----------------------------------------------------------------------------------------------------------------------------------------------------------------------|------------------------------------------------|
| 1      | <i>h</i> <sup>-</sup> 972                                                                                                                                             | wild-type (W-T)                                |
| 397    | <i>h</i> <sup>+</sup> <i>ade6-210 leu1-32 ura4-D18</i>                                                                                                                |                                                |
| 400    | <i>h</i> <sup>-</sup> <i>ade6-216 leu1-32 ura4-D18</i>                                                                                                                |                                                |
| 1129   | <i>h</i> <sup>-</sup> <i>mid1::ura4<sup>+</sup> ura4-D18 leu1-32</i>                                                                                                  | <i>mid1</i> Δ                                  |
| 1347   | <i>pmid-mid1-4GFP</i> (integrated; pAP221; <i>leu1</i> <sup>+</sup> )<br><i>h</i> <sup>-</sup> <i>dmf1::ura4<sup>+</sup> ura4-D18 leu1-32</i>                         | Mid1p-GFP                                      |
| 1349   | <i>pmid-NLS*-mid1-GFP</i> (integrated; pAP167#2; <i>leu1</i> <sup>+</sup> )<br><i>h</i> <sup>-</sup> <i>dmf1::ura4<sup>+</sup> ura4-D18 leu1-32</i>                   |                                                |
| 1384   | pAM19 (D450-506 <i>mid1:12myc:leu1</i> <sup>+</sup> )<br><i>h</i> <sup>-</sup> <i>dmf1::ura4<sup>+</sup> ura4-D18 leu1-32</i>                                         |                                                |
| 1388   | pAM23 (NLS* <i>mid1:12myc:leu1</i> <sup>+</sup> )<br><i>h</i> <sup>-</sup> <i>dmf1::ura4<sup>+</sup> ura4-D18 leu1-32</i>                                             |                                                |
| 1554   | <i>h</i> <sup>+</sup> <i>dmf1::kanMX4 ura4-D18 leu1-32 ade</i> <sup>+</sup>                                                                                           | <i>mid1</i> Δ                                  |
| 1622   | <i>h</i> <sup>-</sup> <i>vps4::ura4<sup>+</sup> leu1-32 ura4-D18 ade</i> <sup>+</sup>                                                                                 | <i>vps4</i> Δ                                  |
| 2417   | <i>h</i> <sup>+</sup> <i>ark1-T11&lt;&lt;kanR leu1-32 ade</i> <sup>+</sup>                                                                                            | <i>ark1-T11</i>                                |
| 2432   | <i>h</i> <sup>+</sup> <i>ark1-T8&lt;&lt;kanR leu1-32 ade</i> <sup>+</sup>                                                                                             | <i>ark1-T8</i>                                 |
| 2673   | <i>h</i> <sup>+</sup> <i>vps4::ura4<sup>+</sup> leu1-32 ura4-D18 ade</i> <sup>+</sup>                                                                                 | <i>vps4</i> Δ                                  |
| 2674   | <i>pmid-mid1-4GFP</i> (integrated; pAP221; <i>leu1</i> <sup>+</sup> )<br><i>h</i> <sup>-</sup> <i>dmf1::ura4<sup>+</sup> ura4-D18? leu1-32 vps4::ura4<sup>+</sup></i> | <i>vps4</i> Δ Mid1p-GFP                        |
| 2709   | <i>pmid-mid1-4GFP</i> (integrated; pAP221; <i>leu1</i> <sup>+</sup> )<br><i>h</i> <sup>-</sup> <i>dmf1::ura4<sup>+</sup> ura4-D18? leu1-32 vps4::ura4<sup>+</sup></i> | <i>vps4</i> Δ Mid1p-GFP                        |
| 2886   | <i>pmid-mid1-4GFP</i> (integrated; pAP221; <i>leu1</i> <sup>+</sup> )<br><i>h</i> <sup>-</sup> <i>dmf1::ura4<sup>+</sup> ura4-D18? leu1-32 ark1-T11&lt;&lt;kanR</i>   | <i>ark1-T11</i> Mid1p-GFP                      |
| 2922   | <i>pmid-mid1-4GFP</i> (integrated; pAP221; <i>leu1</i> <sup>+</sup> )<br><i>h</i> <sup>+</sup> <i>dmf1::ura4<sup>+</sup> ura4-D18 leu1-32 ark1-T8&lt;&lt;kanR</i>     | <i>ark1-T8</i> Mid1p-GFP                       |
| 3100   | NLS* <i>mid1:12myc:leu1</i> <sup>+</sup><br><i>h</i> <sup>-</sup> <i>dmf1::ura4<sup>+</sup> vps4::ura4<sup>+</sup> ura4-D18 leu1-32</i>                               |                                                |
| 3107   | D450-506 <i>mid1:12myc:leu1</i> <sup>+</sup><br><i>h</i> <sup>-</sup> <i>dmf1::ura4<sup>+</sup> vps4::ura4<sup>+</sup> ura4-D18 leu1-32</i>                           |                                                |
| 3181   | pJK148: <i>mid1</i> <sup>+</sup> (wild-type)<br><i>h</i> <sup>-</sup> <i>mid1::ura4<sup>+</sup> ura4-D18 leu1-32</i>                                                  | <i>mid1</i> Δ pJK148: <i>mid1</i> <sup>+</sup> |
| 3185   | pJK148: <i>mid1</i> S523 to A523<br><i>h</i> <sup>-</sup> <i>mid1::ura4<sup>+</sup> ura4-D18 leu1-32</i>                                                              |                                                |
| 3189   | pJK148: <i>mid1</i> S523 to D523<br><i>h</i> <sup>-</sup> <i>mid1::ura4<sup>+</sup> ura4-D18 leu1-32</i>                                                              |                                                |
| 3193   | pJK148: <i>mid1</i> S531 to A531<br><i>h</i> <sup>-</sup> <i>mid1::ura4<sup>+</sup> ura4-D18 leu1-32</i>                                                              |                                                |
| 3197   | pJK148: <i>mid1</i> S531 to D531<br><i>h</i> <sup>-</sup> <i>mid1::ura4<sup>+</sup> ura4-D18 leu1-32</i>                                                              |                                                |
| 3201   | pJK148: <i>mid1</i> S523+S531 to A523+A531<br><i>h</i> <sup>-</sup> <i>mid1::ura4<sup>+</sup> ura4-D18 leu1-32</i>                                                    |                                                |
| 3205   | pJK148: <i>mid1</i> S523+S531 to D523+D531<br><i>h</i> <sup>-</sup> <i>mid1::ura4<sup>+</sup> ura4-D18 leu1-32</i>                                                    |                                                |
| 3218   | pJK148: <i>mid1</i> S523 to A523<br><i>h</i> <sup>?</sup> <i>mid1::ura4<sup>+</sup> ark1-T11&lt;&lt;kanR ade</i> <sup>+</sup>                                         |                                                |
| 3224   | pJK148: <i>mid1</i> S523 to A523<br><i>h</i> <sup>?</sup> <i>mid1::ura4<sup>+</sup> vps4::ura4+ura4-D18 leu1-32</i>                                                   |                                                |
| 3230   | pJK148: <i>mid1</i> S523 to D523<br><i>h</i> <sup>?</sup> <i>mid1::ura4<sup>+</sup> ark1-T11&lt;&lt;kanR ura4-C190T leu1-32</i>                                       |                                                |

|      |                                                                                                                                                                                                                   |
|------|-------------------------------------------------------------------------------------------------------------------------------------------------------------------------------------------------------------------|
| 3235 | pJK148: <i>mid1</i> S531 to A531<br>h <sup>?</sup> <i>mid1::ura4<sup>+</sup> ark1-T11</i> <<kanR <i>ura4-C190T leu1-32</i>                                                                                        |
| 3239 | pJK148: <i>mid1</i> S531 to D531<br>h <sup>?</sup> <i>mid1::ura4<sup>+</sup> ark1-T11</i> <<kanR <i>ura4-C190T leu1-32</i>                                                                                        |
| 3242 | pJK148: <i>mid1</i> S523 to A523+S531 to A531<br>h <sup>?</sup> <i>mid1::ura4<sup>+</sup> ark1-T11</i> <<kanR <i>ura4-C190T leu1-32</i>                                                                           |
| 3246 | pJK148: <i>mid1</i> S523+S531 to D523+D531<br>h <sup>?</sup> <i>mid1::ura4<sup>+</sup> ark1-T11</i> <<kanR <i>ura4-C190T leu1-32</i>                                                                              |
| 3250 | pJK148: <i>mid1</i> (wild-type) <span style="float: right;"><i>mid1</i>Δ pJK148:<i>mid1<sup>+</sup> ark1-T11</i></span><br>h <sup>?</sup> <i>mid1::ura4<sup>+</sup> ark1-T11</i> <<kanR <i>ura4-C190T leu1-32</i> |
| 3257 | pJK148: <i>mid1</i> S523+S531 to D523+D531<br>h <sup>-</sup> <i>mid1::ura4<sup>+</sup> vps4::ura4<sup>+</sup> ura4-D18 leu1-32</i>                                                                                |
| 3258 | pJK148: <i>mid1</i> S523+S531 to D523+D531<br>h <sup>-</sup> <i>mid1::ura4<sup>+</sup> vps4::ura4<sup>+</sup> ura4-D18 leu1-32</i>                                                                                |
| 3260 | pJK148: <i>mid1</i> S523+S531 to A523+A531<br>h <sup>?</sup> <i>mid1::ura4<sup>+</sup> vps4::ura4<sup>+</sup> ura4-D18 leu1-32</i>                                                                                |
| 3264 | pJK148: <i>mid1</i> S531 to D531<br>h <sup>?</sup> <i>mid1::ura4<sup>+</sup> vps4::ura4<sup>+</sup> ura4-D18 leu1-32</i>                                                                                          |
| 3267 | pJK148: <i>mid1</i> S167 to A167<br>h <sup>-</sup> <i>mid1::ura4<sup>+</sup> ura4-D18 leu1-32</i>                                                                                                                 |
| 3271 | pJK148: <i>mid1</i> S167 to D167<br>h <sup>-</sup> <i>mid1::ura4<sup>+</sup> ura4-D18 leu1-32</i>                                                                                                                 |
| 3275 | pJK148: <i>mid1</i> S328 to A328<br>h <sup>-</sup> <i>mid1::ura4<sup>+</sup> ura4-D18 leu1-32</i>                                                                                                                 |
| 3280 | pJK148: <i>mid1</i> S328 to D328<br>h <sup>-</sup> <i>mid1::ura4<sup>+</sup> ura4-D18 leu1-32</i>                                                                                                                 |
| 3283 | pJK148: <i>mid1</i> S331 to A331<br>h <sup>-</sup> <i>mid1::ura4<sup>+</sup> ura4-D18 leu1-32</i>                                                                                                                 |
| 3290 | pJK148: <i>mid1</i> S331 to D331<br>h <sup>-</sup> <i>mid1::ura4<sup>+</sup> ura4-D18 leu1-32</i>                                                                                                                 |
| 3291 | pJK148: <i>mid1</i> S332 to A332<br>h <sup>-</sup> <i>mid1::ura4<sup>+</sup> ura4-D18 leu1-32</i>                                                                                                                 |
| 3295 | pJK148: <i>mid1</i> S332 to D332<br>h <sup>-</sup> <i>mid1::ura4<sup>+</sup> ura4-D18 leu1-32</i>                                                                                                                 |
| 3299 | pJK148: <i>mid1</i> S167+S328+S331+S332 to A167+A328+A331+A332<br>h <sup>-</sup> <i>mid1::ura4<sup>+</sup> ura4-D18 leu1-32</i>                                                                                   |
| 3305 | pJK148: <i>mid1</i> S167+S328+S331+S332 to D167+D328+D331+D332<br>h <sup>-</sup> <i>mid1::ura4<sup>+</sup> ura4-D18 leu1-32</i>                                                                                   |
| 3307 | pJK148: <i>mid1</i> S167+S328+S331+S332+S523+S531 to<br>A167+A328+A331+A332+A523+A531<br>h <sup>-</sup> <i>mid1::ura4<sup>+</sup> ura4-D18 leu1-32</i>                                                            |
| 3311 | pJK148: <i>mid1</i> S167+S328+S331+S332+S523+S531 to<br>D167+D328+D331+D332+D523+D531<br>h <sup>-</sup> <i>mid1::ura4<sup>+</sup> ura4-D18 leu1-32</i>                                                            |
| 3315 | pJK148: <i>mid1</i> S523 to D523<br>h <sup>?</sup> <i>mid1::ura4<sup>+</sup> vps4::ura4<sup>+</sup> ura4-D18 leu1-32</i>                                                                                          |
| 3318 | pJK148: <i>mid1</i> S531 to A531<br>h <sup>?</sup> <i>mid1::ura4<sup>+</sup> vps4::ura4<sup>+</sup> ura4-D18 leu1-32</i>                                                                                          |
| 3321 | pJK148: <i>mid1</i> S167 to A167<br>h <sup>?</sup> <i>mid1::ura4<sup>+</sup> ark1-T11</i> <<kanR <i>ura4-C190T leu1-32</i>                                                                                        |
| 3324 | pJK148: <i>mid1</i> S167 to D167<br>h <sup>?</sup> <i>mid1::ura4<sup>+</sup> ark1-T11</i> <<kanR <i>ura4-C190T leu1-32</i>                                                                                        |
| 3327 | pJK148: <i>mid1</i> S328 to A328<br>h <sup>?</sup> <i>mid1::ura4<sup>+</sup> ark1-T11</i> <<kanR <i>ura4-C190T leu1-32</i>                                                                                        |
| 3330 | pJK148: <i>mid1</i> S328 to D328<br>h <sup>?</sup> <i>mid1::ura4<sup>+</sup> ark1-T11</i> <<kanR <i>ura4-C190T leu1-32</i>                                                                                        |
| 3333 | pJK148: <i>mid1</i> S331 to A331<br>h <sup>?</sup> <i>mid1::ura4<sup>+</sup> ark1-T11</i> <<kanR <i>ura4-C190T leu1-32</i>                                                                                        |



|      |                                                                                                                                                                                                                 |
|------|-----------------------------------------------------------------------------------------------------------------------------------------------------------------------------------------------------------------|
| 3336 | pJK148: <i>mid1</i> S331 to D331<br>h <sup>?</sup> <i>mid1::ura4<sup>+</sup> ark1-T11&lt;&lt;kanR ura4-C190T leu1-32</i>                                                                                        |
| 3339 | pJK148: <i>mid1</i> S332 to A332<br>h <sup>?</sup> <i>mid1::ura4<sup>+</sup> ark1-T11&lt;&lt;kanR ura4-C190T leu1-32</i>                                                                                        |
| 3342 | pJK148: <i>mid1</i> S332 to D332<br>h <sup>?</sup> <i>mid1::ura4<sup>+</sup> ark1-T11&lt;&lt;kanR ura4-C190T leu1-32</i>                                                                                        |
| 3345 | pJK148: <i>mid1</i> S167+S328+S331+S332 to A167+A328+A331+A332<br>h <sup>?</sup> <i>mid1::ura4<sup>+</sup> ark1-T11&lt;&lt;kanR ura4-C190T leu1-32</i>                                                          |
| 3349 | pJK148: <i>mid1</i> S167+S328+S331+S332 to D167+D328+D331+D332<br>h <sup>?</sup> <i>mid1::ura4<sup>+</sup> ark1-T11&lt;&lt;kanR ura4-C190T leu1-32</i>                                                          |
| 3352 | pJK148: <i>mid1</i> S167+S328+S331+S332+S523+S531 to<br>A167+A328+A331+A332+A523+A531<br>h <sup>?</sup> <i>mid1::ura4<sup>+</sup> ark1-T11&lt;&lt;kanR ura4-C190T leu1-32</i>                                   |
| 3355 | pJK148: <i>mid1</i> S167+S328+S331+S332+S523+S531 to<br>D167+D328+D331+D332+D523+D531<br>h <sup>?</sup> <i>mid1::ura4<sup>+</sup> ark1-T11&lt;&lt;kanR ura4-C190T leu1-32</i>                                   |
| 3375 | pJK148: <i>mid1</i> S167 to A167<br>h <sup>?</sup> <i>mid1::ura4<sup>+</sup> plo1-ts35 ura4-D18 leu1-32</i>                                                                                                     |
| 3377 | pJK148: <i>mid1</i> S167 to D167<br>h <sup>?</sup> <i>mid1::ura4<sup>+</sup> plo1-ts35 ura4-D18 leu1-32</i>                                                                                                     |
| 3383 | pJK148: <i>mid1</i> S167 to A167<br>h <sup>?</sup> <i>mid1::ura4<sup>+</sup> vps4::ura4<sup>+</sup> ura4-D18 leu1-32</i>                                                                                        |
| 3392 | pJK148: <i>mid1</i> S328 to A328<br>h <sup>?</sup> <i>mid1::ura4<sup>+</sup> plo1-ts35 ura4-D18 leu1-32</i>                                                                                                     |
| 3386 | pJK148: <i>mid1</i> S328 to D328<br>h <sup>?</sup> <i>mid1::ura4<sup>+</sup> plo1-ts35 ura4-D18 leu1-32</i>                                                                                                     |
| 3392 | pJK148: <i>mid1</i> S328 to A328<br>h <sup>?</sup> <i>mid1::ura4<sup>+</sup> plo1-ts35 ura4-D18 leu1-32</i>                                                                                                     |
| 3397 | pJK148: <i>mid1</i> S331 to A331<br>h <sup>?</sup> <i>mid1::ura4<sup>+</sup> plo1-ts35 ura4-D18 leu1-32</i>                                                                                                     |
| 3400 | pJK148: <i>mid1</i> S332 to A332<br>h <sup>?</sup> <i>mid1::ura4<sup>+</sup> plo1-ts35 ura4-D18 leu1-32</i>                                                                                                     |
| 3403 | pJK148: <i>mid1</i> S523 to D523<br>h <sup>-</sup> <i>mid1::ura4<sup>+</sup> plo1-ts35 ura4-D18 leu1-32</i>                                                                                                     |
| 3407 | pJK148: <i>mid1</i> S523 to A523<br>h <sup>-</sup> <i>mid1::ura4<sup>+</sup> plo1-ts35 ura4-D18 leu1-32</i>                                                                                                     |
| 3411 | pJK148: <i>mid1</i> S332 to D332<br>h <sup>-</sup> <i>mid1::ura4<sup>+</sup> plo1-ts35 ura4-D18 leu1-32</i>                                                                                                     |
| 3415 | pJK148: <i>mid1</i> S531 to A531<br>h <sup>-</sup> <i>mid1::ura4<sup>+</sup> plo1-ts35 ura4-D18 leu1-32</i>                                                                                                     |
| 3419 | pJK148: <i>mid1</i> S167+S328+S331+S332 to A167+A328+A331+A332<br>h <sup>-</sup> <i>mid1::ura4<sup>+</sup> plo1-ts35 ura4-D18 leu1-32</i>                                                                       |
| 3422 | pJK148: <i>mid1</i> S167+S328+S331+S332 to D167+D328+D331+D332<br>h <sup>-</sup> <i>mid1::ura4<sup>+</sup> plo1-ts35 ura4-D18 leu1-32</i>                                                                       |
| 3425 | pJK148: <i>mid1</i> S167+S328+S331+S332+S523+S531 to<br>A167+A328+A331+A332+A523+A531<br>h <sup>-</sup> <i>mid1::ura4<sup>+</sup> plo1-ts35 ura4-D18 leu1-32</i>                                                |
| 3428 | pJK148: <i>mid1</i> S531 to D531<br>h <sup>-</sup> <i>mid1::ura4<sup>+</sup> plo1-ts35 ura4-D18 leu1-32</i>                                                                                                     |
| 3437 | pJK148: <i>mid1<sup>+</sup></i> (wild-type) <span style="float: right;"><i>mid1Δ</i> pJK148:<i>mid1<sup>+</sup> plo1-ts35</i></span><br>h <sup>-</sup> <i>mid1::ura4<sup>+</sup> plo1-ts35 ura4-D18 leu1-32</i> |
| 3441 | pJK148: <i>mid1</i> S167+S328+S331+S332+S523+S531 to<br>D167+D328+D331+D332+D523+D531<br>h <sup>-</sup> <i>mid1::ura4<sup>+</sup> plo1-ts35 ura4-D18 leu1-32</i>                                                |
| 3444 | pJK148: <i>mid1</i> S523 to A523 + S531 to A531<br>h <sup>-</sup> <i>mid1::ura4<sup>+</sup> plo1-ts35 ura4-D18 leu1-32</i>                                                                                      |
| 3447 | pJK148: <i>mid1</i> S523 to D523 + S531 to D531<br>h <sup>-</sup> <i>mid1::ura4<sup>+</sup> plo1-ts35 ura4-D18 leu1-32</i>                                                                                      |

|      |                                                                                                                                                                               |
|------|-------------------------------------------------------------------------------------------------------------------------------------------------------------------------------|
| 3450 | pJK148: <i>mid1</i> S167 to A167<br>h <sup>?</sup> <i>mid1::ura4<sup>+</sup> vps4::ura4+ ura4-D18 leu1-32</i>                                                                 |
| 3456 | pJK148: <i>mid1</i> S328 to A328<br>h <sup>?</sup> <i>mid1::ura4<sup>+</sup> vps4::ura4+ ura4-D18 leu1-32</i>                                                                 |
| 3461 | pJK148: <i>mid1</i> S167+S328+S331+S332 to D167+D328+D331+D332<br>h <sup>?</sup> <i>mid1::ura4<sup>+</sup> vps4::ura4+ ura4-D18 leu1-32</i>                                   |
| 3463 | pJK148: <i>mid1</i> S167+S328+S331+S332+S523+S531 to<br>D167+D328+D331+D332+D523+D531<br>h <sup>?</sup> <i>mid1::ura4<sup>+</sup> vps4::ura4+ ura4-D18 leu1-32</i>            |
| 3467 | pJK148: <i>mid1</i> S167+S328+S331+S332+S523+S531 to<br>A167+A328+A331+A332+A523+A531<br>h <sup>?</sup> <i>mid1::ura4<sup>+</sup> vps4::ura4+ ura4-D18 leu1-32</i>            |
| 3469 | pJK148: <i>mid1</i> S332 to D332<br>h <sup>?</sup> <i>mid1::ura4<sup>+</sup> vps4::ura4+ ura4-D18 leu1-32</i>                                                                 |
| 3473 | pJK148: <i>mid1</i> S332 to A332<br>h <sup>?</sup> <i>mid1::ura4<sup>+</sup> vps4::ura4+ ura4-D18 leu1-32</i>                                                                 |
| 3481 | pJK148: <i>mid1</i> S328 to D328<br>h <sup>?</sup> <i>mid1::ura4<sup>+</sup> vps4::ura4+ ura4-D18 leu1-32</i>                                                                 |
| 3485 | pJK148: <i>mid1</i> S331 to A331<br>h <sup>?</sup> <i>mid1::ura4<sup>+</sup> vps4::ura4+ ura4-D18 leu1-32</i>                                                                 |
| 3486 | pJK148: <i>mid1<sup>+</sup></i> (wild-type) <i>mid1</i> Δ pJK148: <i>mid1<sup>+</sup> vps4</i> Δ<br>h <sup>?</sup> <i>mid1::ura4<sup>+</sup> vps4::ura4+ ura4-D18 leu1-32</i> |
| 3488 | pJK148: <i>mid1<sup>+</sup></i> S167+S328+S331+S332 to A167+A328+A331+A332<br>h <sup>?</sup> <i>mid1::ura4<sup>+</sup> vps4::ura4+ ura4-D18 leu1-32</i>                       |

3

4

1 **S2 Table. Vector DNA constructs used in this study. "GB" number refers to the**  
 2 **laboratory reference collection.**

| GB No. | Abbreviated plasmid vector description                                                                                                                                |
|--------|-----------------------------------------------------------------------------------------------------------------------------------------------------------------------|
| 880    | pET-14b - His tagged, Vps4p full length, <i>Nde I/Bam HI</i><br>Invitrogen order 13AB6ZFP                                                                             |
| 881    | pGEX4T1 - GST tagged, Mid1p 1-453, <i>Bam HI/Xho I</i> - "N-term"<br>GenScript order U2640BJ110                                                                       |
| 882    | pGEX4T1 - GST tagged, Mid1p 452-579, <i>Bam HI/Xho I</i> - "Middle"                                                                                                   |
| 883    | pGEX4T1 - GST tagged, Mid1p 578-799, <i>Bam HI/Xho I</i>                                                                                                              |
| 884    | pGEX4T1 - GST tagged, Mid1p 798-920, <i>Bam HI/Xho I</i> - "C-term"                                                                                                   |
| 889    | pET-14b - His tagged, Myo2p C-terminus amino acids 1394-1526, <i>Nde I/Bam HI</i><br>GenScript order U9540CD270_2                                                     |
| 907    | <i>mid1</i> <sup>+</sup> wild-type + 1 kb upstream of ORF - 3,853 base pairs in total<br><i>Kpn I/Sac I</i> fragment cloned into pJK148<br>GenScript order U2002DH100 |
| 909    | <i>mid1</i> mutant (1) S523 to A523 in pJK148                                                                                                                         |
| 911    | <i>mid1</i> mutant (1) S523 to D523 in pJK148                                                                                                                         |
| 913    | <i>mid1</i> mutant (1) S531 to A531 in pJK148                                                                                                                         |
| 915    | <i>mid1</i> mutant (1) S531 to D531 in pJK148                                                                                                                         |
| 917    | <i>mid1</i> mutant (2) S523 to A523 + S531 to A531 in pJK148                                                                                                          |
| 919    | <i>mid1</i> mutant (2) S523 to D523 + S531 to D531 in pJK148                                                                                                          |
| 923    | <i>mid1</i> mutant (1) S167 to A167 in pJK148<br>GenScript order U894VEB050                                                                                           |
| 924    | <i>mid1</i> mutant (1) S167 to D167 in pJK148                                                                                                                         |
| 925    | <i>mid1</i> mutant (1) S328 to A328 in pJK148                                                                                                                         |
| 926    | <i>mid1</i> mutant (1) S328 to D328 in pJK148                                                                                                                         |
| 927    | <i>mid1</i> mutant (1) S331 to A331 in pJK148                                                                                                                         |
| 928    | <i>mid1</i> mutant (1) S331 to D331 in pJK148                                                                                                                         |
| 929    | <i>mid1</i> mutant (1) S332 to A332 in pJK148                                                                                                                         |
| 930    | <i>mid1</i> mutant (1) S332 to D332 in pJK148                                                                                                                         |
| 931    | <i>mid1</i> mutant (4) S167 to A167 + S328 to A328 + S331 to A331+ S332 to A332 in pJK148                                                                             |
| 932    | <i>mid1</i> mutant (4) S167 to D167 + S328 to D328 + S331 to D331+ S332 to D332 in pJK148                                                                             |
| 933    | <i>mid1</i> mutant (6) S167 to A167 + S328 to A328 + S331 to A331+ S332 to A332 + S523 to A523 + S531 to A531 in pJK148                                               |
| 934    | <i>mid1</i> mutant (6) S167 to D167 + S328 to D328 + S331 to D331+ S332 to D332 + S523 to D523 + S531 to D531 in pJK148                                               |
| 935    | pGEX4T1 - GST tagged, Mid1p 1-453, <i>Bam HI/Xho I</i> - "N-term" S167 to A167<br>GenScript order U8198EF120                                                          |
| 936    | pGEX4T1 - GST tagged, Mid1p 1-453, <i>Bam HI/Xho I</i> - "N-term" S328 to A328                                                                                        |
| 937    | pGEX4T1 - GST tagged, Mid1p 1-453, <i>Bam HI/Xho I</i> - "N-term" S331 to A331                                                                                        |
| 938    | pGEX4T1 - GST tagged, Mid1p 1-453, <i>Bam HI/Xho I</i> - "N-term" S332 to A332                                                                                        |
| 939    | pGEX4T1 - GST tagged, Mid1p 1-453, <i>Bam HI/Xho I</i> - "N-term"<br>S167 to A167 + S328 to A328 + S331 to A331 + S332 to A332                                        |
| 940    | pGEX4T1 - GST tagged, Mid1p 452-579, <i>Bam HI/Xho I</i> - "Middle" S523 to A523                                                                                      |
| 941    | pGEX4T1 - GST tagged, Mid1p 452-579, <i>Bam HI/Xho I</i> - "Middle" S531 to A531                                                                                      |
| 942    | pGEX4T1 - GST tagged, Mid1p 452-579, <i>Bam HI/Xho I</i> - "Middle"<br>S523 to A523 + S531 to A531                                                                    |

1 **S3 Table. Summary of *S. pombe* global proteomic studies of identified Mid1p**  
 2 **phospho-sites.**

| Study | Total number of phosphorylation events | Mid1p phospho-sites |                        |          |                        | Reference |
|-------|----------------------------------------|---------------------|------------------------|----------|------------------------|-----------|
|       |                                        | Ref. No.            | Mid1p Residue position | Ref. No. | Mid1p Residue position |           |
| 1     | 8000                                   | 7140                | <b>S15</b>             | 7150     | <b>S335</b>            | [21]      |
|       |                                        | 7141                | <b>S18</b>             | 7151     | <b>S110</b>            |           |
|       |                                        | 7142                | <b>S167</b>            | 7152     | <b>S112</b>            |           |
|       |                                        | 7144                | <b>S24</b>             | 7153     | <b>S344</b>            |           |
|       |                                        | 7145                | <b>S27</b>             | 7154     | <b>S347</b>            |           |
|       |                                        | 7146                | <b>S328</b>            | 9637     | <b>T336</b>            |           |
|       |                                        | 7148                | <b>S331</b>            | 9638     | <b>T111</b>            |           |
|       |                                        | 7149                | <b>S332</b>            | 10,040   | <b>Y333</b>            |           |
| 2     | 3682                                   | 3150                | <b>S7</b>              | 3156     | <b>S328</b>            | [22]      |
|       |                                        | 3151                | <b>S167</b>            | 3157     | <b>S331</b>            |           |
|       |                                        | 3153                | <b>S24</b>             | 3158     | <b>S109</b>            |           |
|       |                                        | 3154                | <b>S27</b>             | 3159     | <b>S344</b>            |           |
|       |                                        | 3155                | <b>28</b>              | 3160     | <b>S347</b>            |           |
| 3     | 12,524                                 |                     |                        | 20,982   | <b>S523</b>            | [23]      |
|       |                                        | 10,736              | <b>S218</b>            | 10,749   | <b>S434</b>            |           |
|       |                                        | 10,738              | <b>S24</b>             | 10,750   | <b>T435</b>            |           |
|       |                                        | 5831                | <b>S167</b>            | 10,755   | <b>S440</b>            |           |
|       |                                        | 10,742              | <b>S331</b>            | 10,756   | <b>S444</b>            |           |
|       |                                        | 10,743              | <b>S328</b>            | 10,757   | <b>S445</b>            |           |
|       |                                        | 10,744              | <b>S332</b>            | 10,758   | <b>S532</b>            |           |
|       |                                        | 10,745              | <b>T336</b>            | 10,759   | <b>S527</b>            |           |
|       |                                        | 10,746              | <b>S403</b>            | 10,760   | <b>S531</b>            |           |
|       |                                        | 10,747              | <b>S432</b>            | 10,764   | <b>T34</b>             |           |
|       |                                        | 10,748              | <b>S433</b>            | 10,765   | <b>S42</b>             |           |
| 4     | 7298                                   |                     |                        | 10,767   | <b>S335</b>            | [24]      |
|       |                                        | 5835                | <b>S167</b>            | 5844     | <b>S403</b>            |           |
|       |                                        | 5836                | <b>S218</b>            | 5845     | <b>S434</b>            |           |
|       |                                        | 5837                | <b>S24</b>             | 5846     | <b>S444</b>            |           |
|       |                                        | 5838                | <b>S27</b>             | 5847     | <b>S531</b>            |           |
|       |                                        | 5839                | <b>S28</b>             | 5848     | <b>S541</b>            |           |
|       |                                        | 5840                | <b>S328</b>            | 5849     | <b>S7</b>              |           |
|       |                                        | 5842                | <b>S331</b>            | 5850     | <b>T34</b>             |           |
| 5843  | <b>S395</b>                            | 5851                | <b>T405</b>            |          |                        |           |





(A)

W-T

*mid1* $\Delta$

*mid1* $\Delta$  pJK148:*mid1*<sup>+</sup>

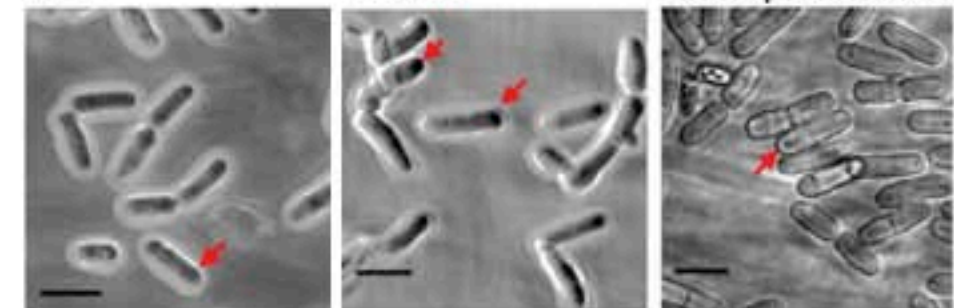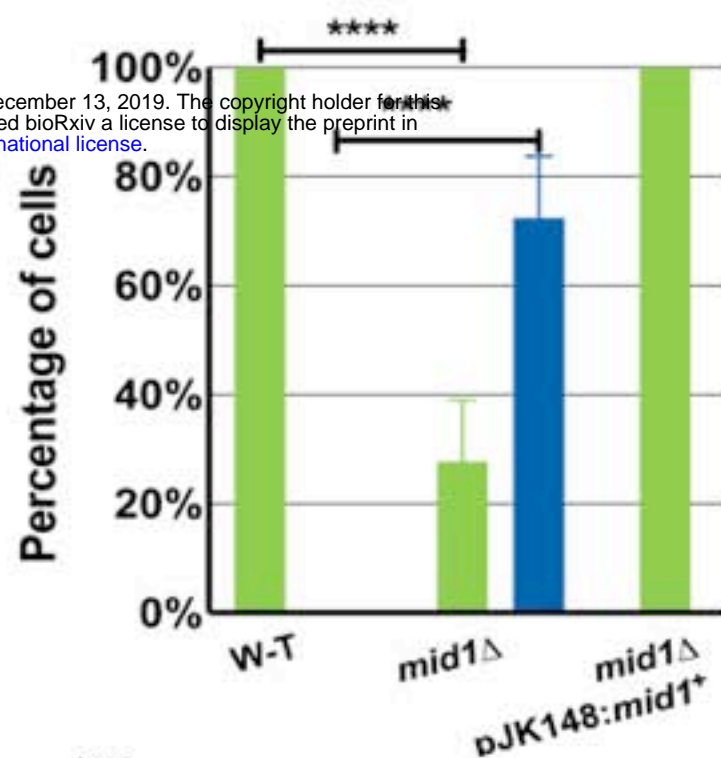

(B)

Rod

Branched

Bulged

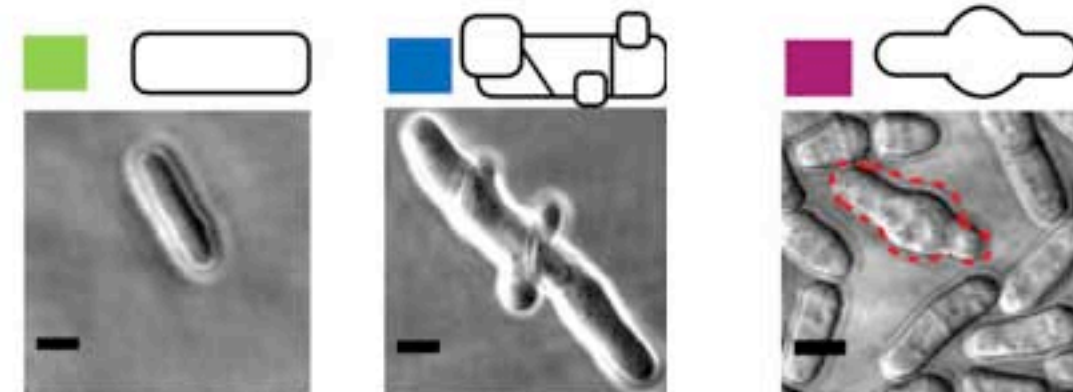

Capped tip

Pointed tip

Misplaced septa

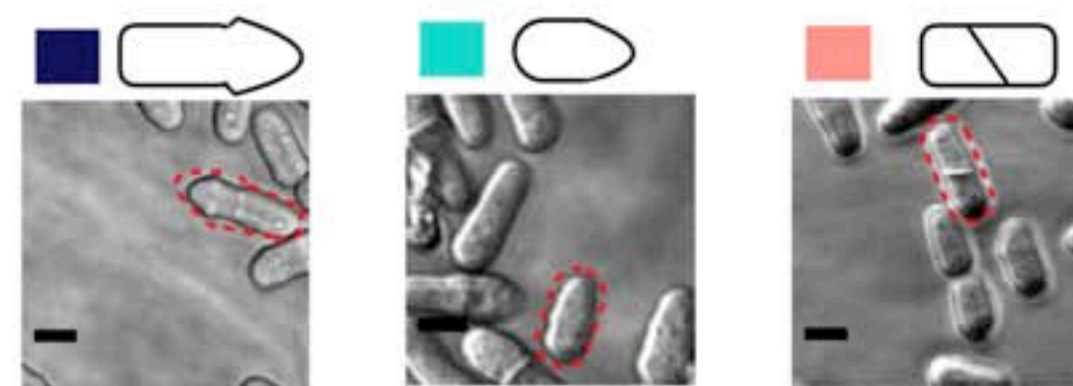

(C)

*mid1* $\Delta$

*mid1* $\Delta$

pJK148:*mid1* S523A pJK148:*mid1* S523D

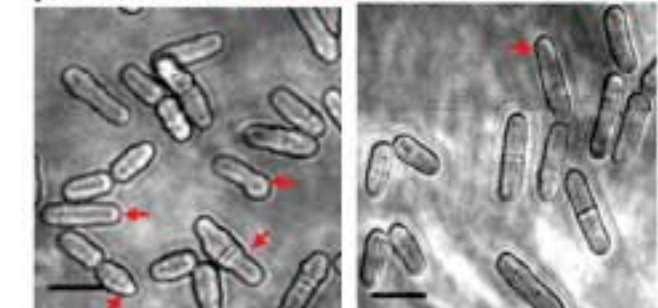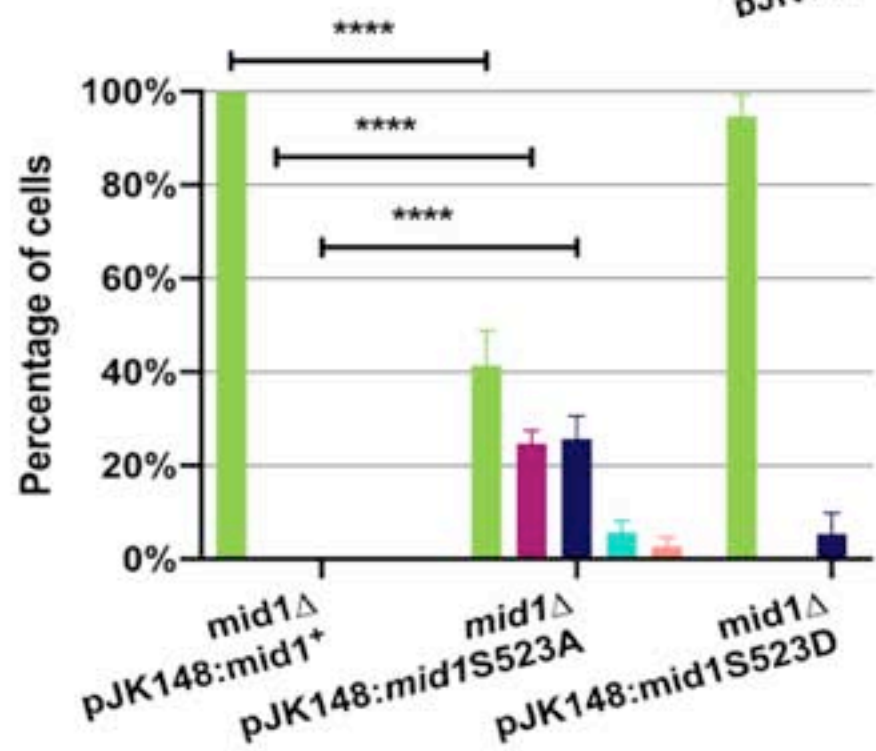

(D)

*mid1* $\Delta$

*mid1* $\Delta$

pJK148:*mid1* S531A pJK148:*mid1* S531D

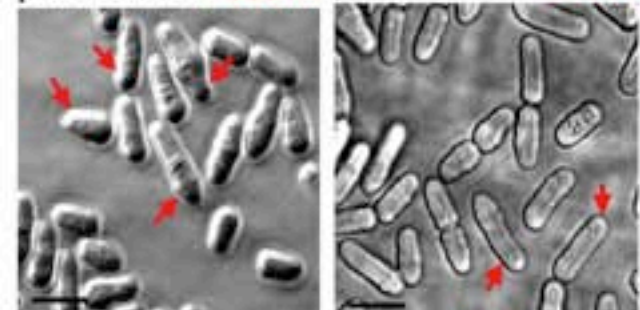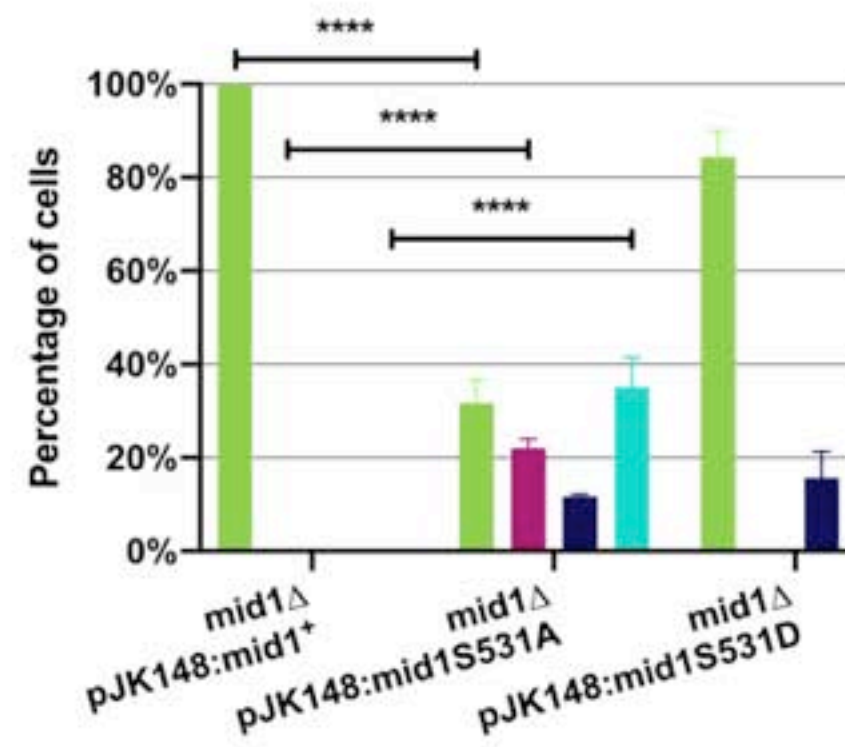

(E)

*mid1* $\Delta$

*mid1* $\Delta$

pJK148:*mid1* S523A and S531A pJK148:*mid1* S523D and S531D

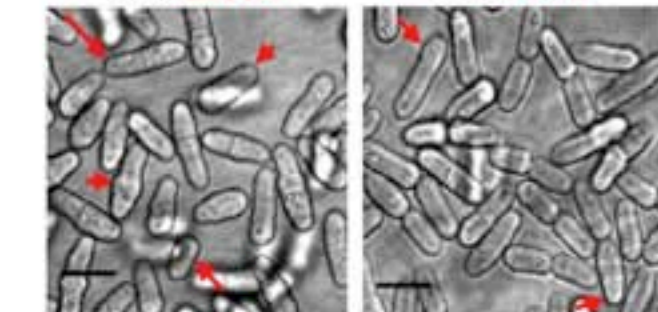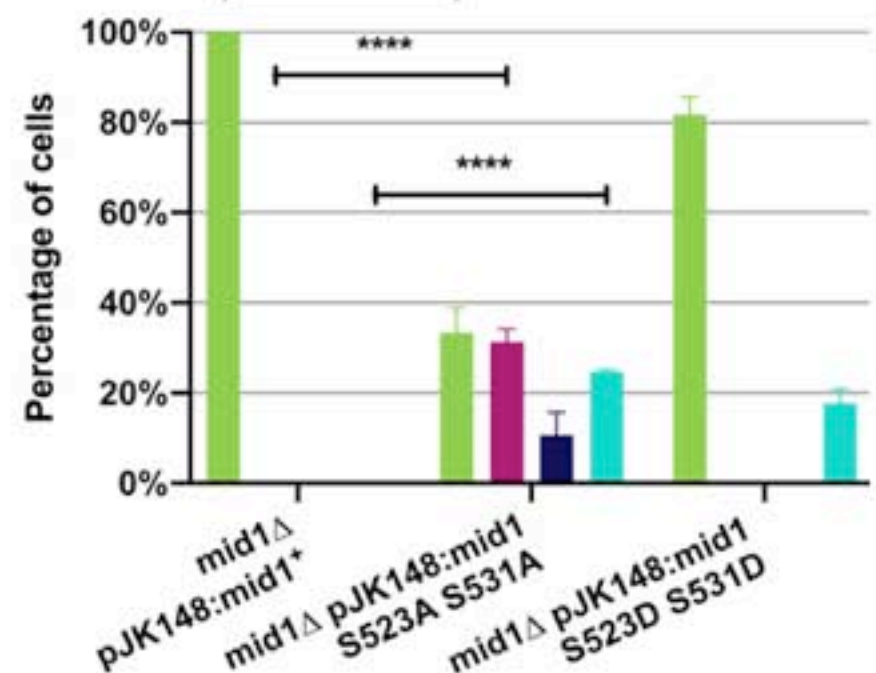



**(A)**

bioRxiv preprint doi: <https://doi.org/10.1101/2019.12.13.875211>; this version posted December 13, 2019. The copyright holder for this preprint (which was not certified by peer review) is the author/funder, who has granted bioRxiv a license to display the preprint in perpetuity. It is made available under aCC-BY 4.0 International license.

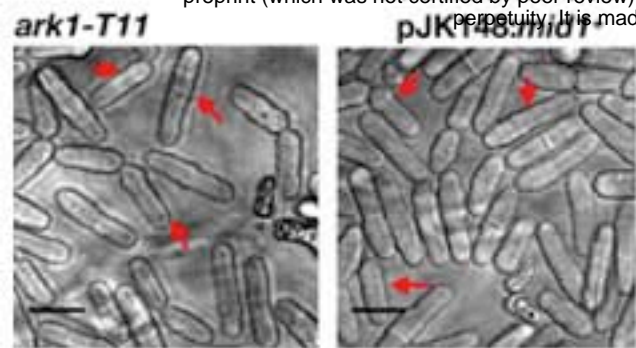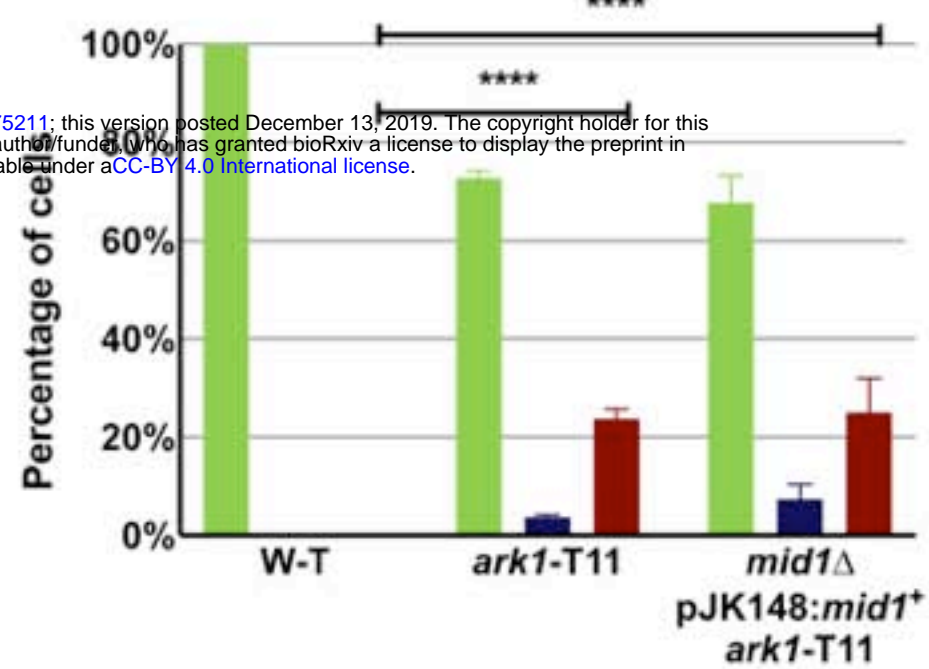**(B)**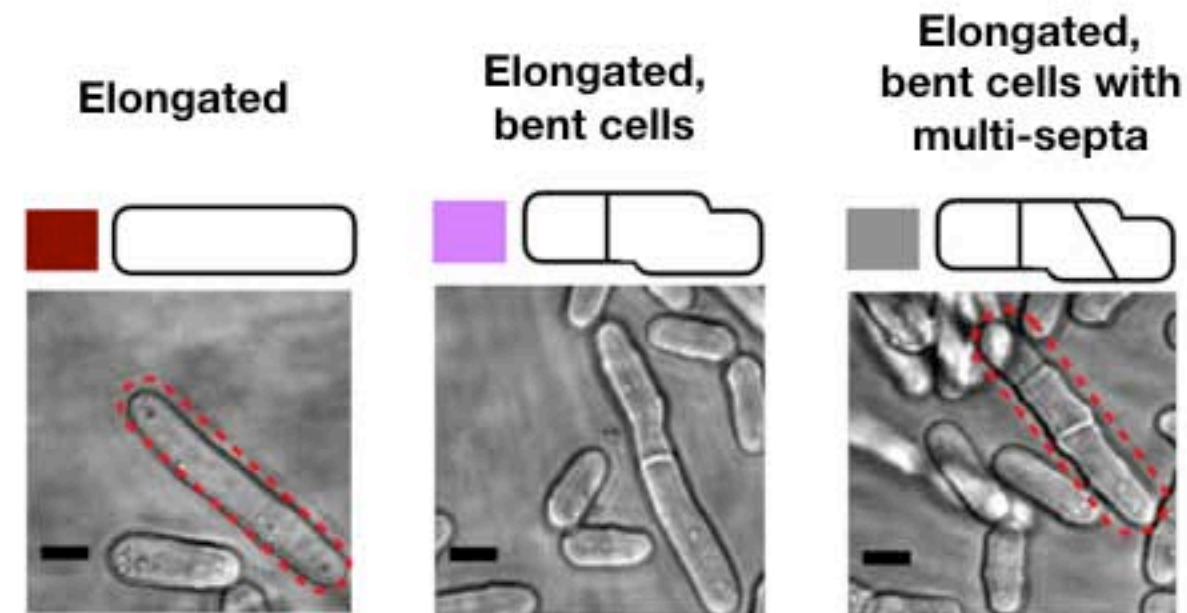**(C)**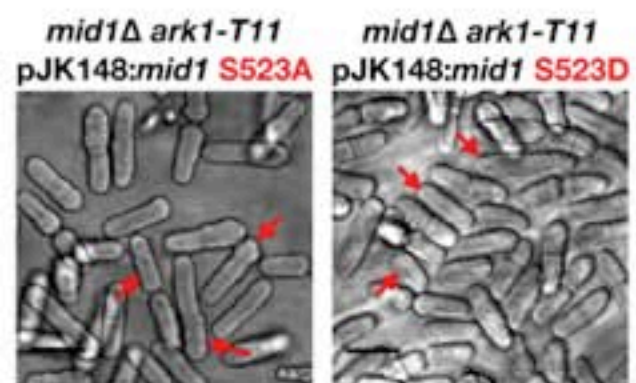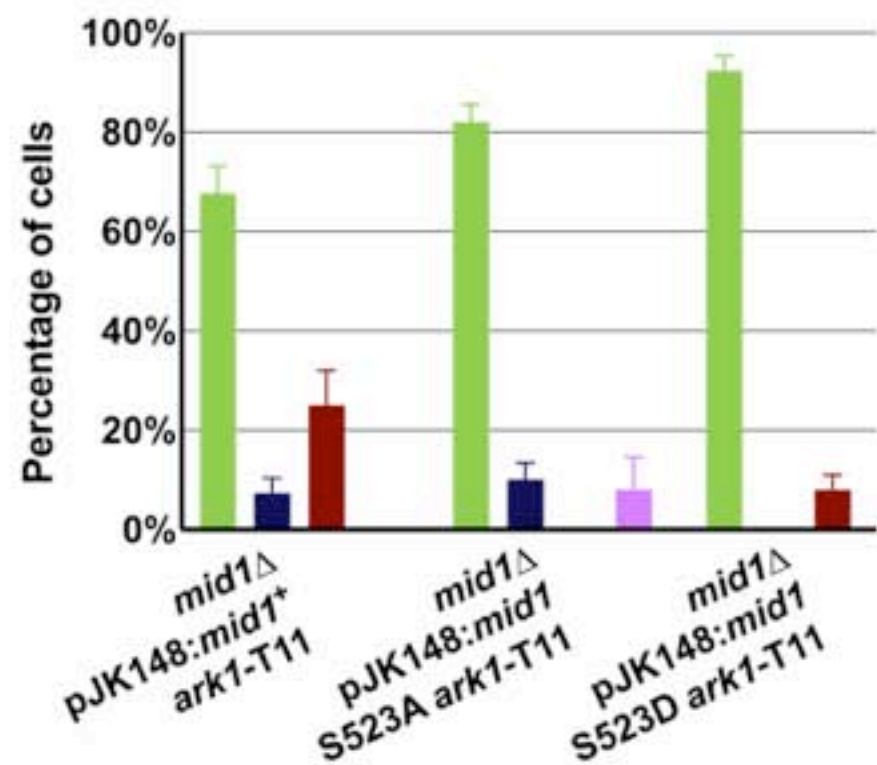**(E)**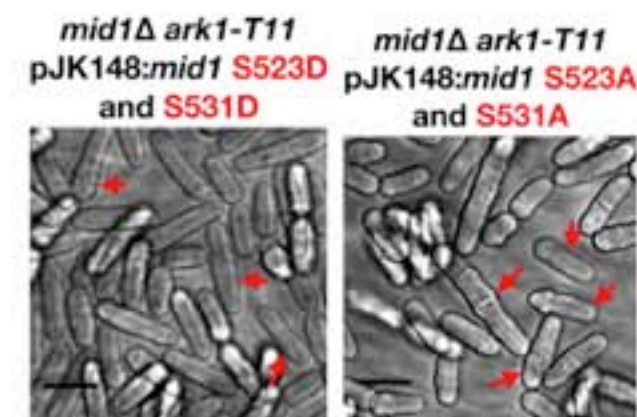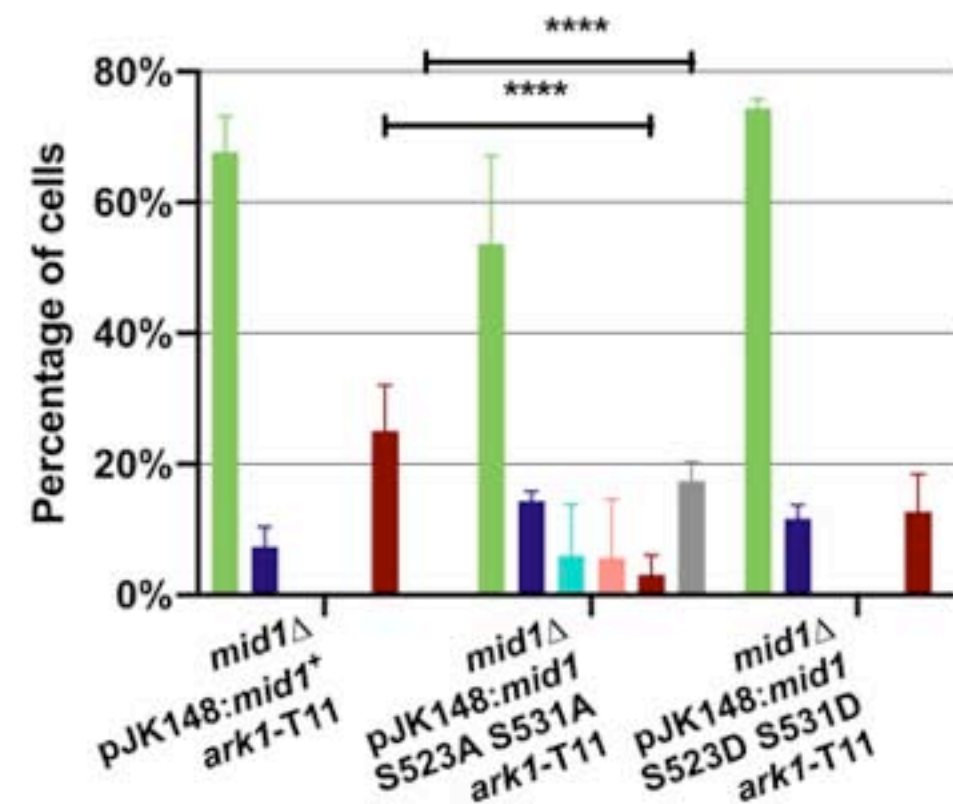**(D)**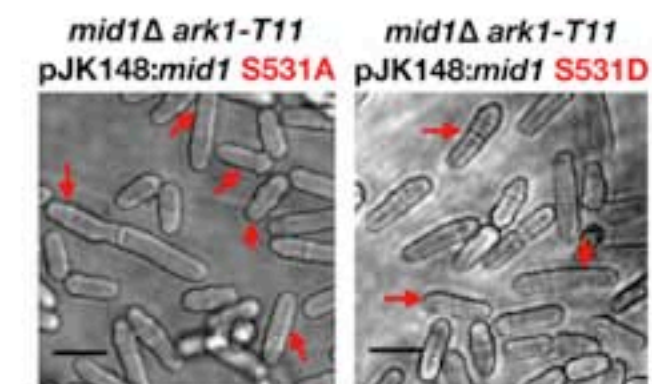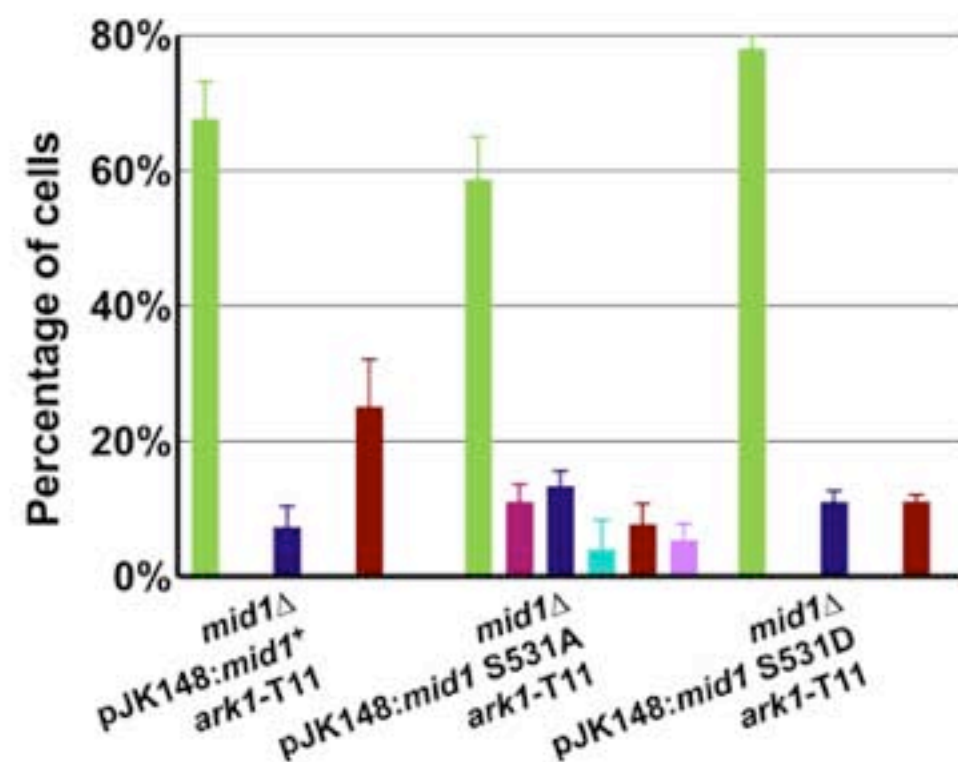

Source: http://biorxiv.org/content/10.1101/2019.12.13.875211v1.full.pdf
